# Supplementary material
Source: PubMed Central journal article supplement (PMC7611104)
Supplement: EMS127821-supplement-Supplementary_Material.pdf [file EMS127821-supplement-Supplementary_Material.pdf]

---

**Supplementary information**

---

**The burden of heat-related mortality  
attributable to recent human-induced  
climate change**

---

In the format provided by the  
authors and unedited

## Supplementary Information

### **The burden of heat-related mortality attributable to recent human-induced climate change**

A. M. Vicedo-Cabrera, N. Scovronick, F. Sera, D. Roye, R. Schneider, A. Tobias, C. Astrom, Y. Guo, Y. Honda, D. M. Hondula, R. Abrutzky, S. Tong, M. de Sousa Zanotti Stagliorio Coelho, P. H. Nascimento Saldiva, E. Lavigne, P. Matus Correa, N. Valdes Ortega, H. Kan, S. Osorio, J. Kysely, A. Urban, H. Orru, E. Indermitte, J. J. K. Jaakkola, N. Rytty, M. Pascal, A. Schneider, K. Katsouyanni, E. Samoli, F. Mayvaneh, A. Entezari, P. Goodman, A. Zeka, P. Michelozzi, F. de'Donato, M. Hashizume, B. Alahmad, M. Hurtado Diaz, C. De La Cruz Valencia, A. Overcenco, D. Houthuijs, C. Ameling, S. Rao, F. Di Ruscio, G. Carrasco-Escobar, X. Seposo, S. Silva, J. Madureira, I. H. Holobaca, S. Fratianni, F. Acquaotta, H. Kim, W. Lee, C. Iniguez, B. Forsberg, MS. Ragettli, Y. L. L. Guo, B. Y. Chen, S. Li, B. Armstrong, A. Aleman, A. Zanobetti, J. Schwartz, T. N. Dang, D. V. Dung, N. Gillett, A. Haines, M. Mengel, V. Huber, A. Gasparrini.

**Supplementary Table 1.** Description of the observed temperature and mortality data in the MCC locations.

| COUNTRY   | NUMBER OF LOCATIONS                                      | PERIOD    | MORTALITY DATA                                                                                        | TEMPERATURE DATA                                                                                                                                                                                                                        | NOTES                                                                                          |
|-----------|----------------------------------------------------------|-----------|-------------------------------------------------------------------------------------------------------|-----------------------------------------------------------------------------------------------------------------------------------------------------------------------------------------------------------------------------------------|------------------------------------------------------------------------------------------------|
| Argentina | 3 cities                                                 | 2005-2015 | Non-external causes only (ICD-9: 0-799; ICD-10: A00-R99) from National Ministry of Health.            | Mean daily temperature (in °C) and relative humidity (in %), computed as the 24-hour average based on hourly measurements from one meteorological station in each city provided by the National Weather Service.                        | Missing data amount for 0.91% and 0.00% of the mortality and temperature series, respectively. |
| Australia | 3 cities                                                 | 1991-2009 | Non-external causes only (ICD-9: 0-799; ICD-10: A00-R99) from Australian Bureau of Statistics.        | Mean daily temperature (in °C) and relative humidity (in %), computed as the 24-hour average based on hourly measurements from meteorological stations located within ≤30 km of each city provided by Australian Bureau of Meteorology. | Missing data amount for 0.18% and 0.00% of the mortality and temperature series, respectively. |
| Brazil    | 18 cities                                                | 1997-2011 | Non-external causes only (ICD-9: 0-799; ICD-10: A00-R99) from the Ministry of Health.                 | Mean daily temperature (in °C) and relative humidity (in %), computed from the 24-h average of hourly measurements, from weather stations located within the urban area provided by National Institute of Meteorology of Brazil         | Missing data amount for 1.85% and 3.21% of the mortality and temperature series, respectively. |
| Canada    | 25 census metropolitan areas (CMA) and 1 city (Hamilton) | 1991-2015 | All causes collected from Canadian Mortality Database.                                                | Mean daily temperature (in °C) and relative humidity (in %), computed as the 24-hour average based on hourly measurements, were obtained from Environment Canada collected from monitoring stations located closest to the CMA centre.  | Missing data amount for 0.82% and 2.79% of the mortality and temperature series, respectively. |
| Chile     | 4 cities                                                 | 2004-2014 | All causes provided by the Departamento de Estadísticas e Información de Salud (Ministerio de Salud)) | Mean daily temperature (in °C), computed as 24-hour average based on hourly measurements, were obtained from Sistema de Información Nacional de Calidad del Aire (SINCA), Ministerio del Medio Ambiente.                                | Missing data amount for 0.15% and 9.7% of the mortality and temperature series, respectively.  |
| China     | 14 cities                                                | 1996-2015 | Non-external causes only (ICD-9: 0-799; ICD-10: A00-R99) from Municipal Center                        | Mean daily temperature (in °C), computed as averaged hourly temperatures, were obtained from China                                                                                                                                      | Missing data amount for 6.98% and 7.35% of the mortality and                                   |

|                       |                             |           |                                                                                                            |                                                                                                                                                                                                                                     |                                                                                                                                                                                                                   |
|-----------------------|-----------------------------|-----------|------------------------------------------------------------------------------------------------------------|-------------------------------------------------------------------------------------------------------------------------------------------------------------------------------------------------------------------------------------|-------------------------------------------------------------------------------------------------------------------------------------------------------------------------------------------------------------------|
|                       |                             |           | for Disease Control and Prevention in each city.                                                           | Meteorological Data Sharing Service System ( <a href="http://data.cma.cn/">http://data.cma.cn/</a> ).                                                                                                                               | temperature series, respectively. Data on 17 cities were originally collected, but we excluded 3 cities (Tangshan, Nanjing, Guangzhou) because of no data on non-external or suspected errors in data collection. |
| <i>Colombia</i>       | 5 cities                    | 1998-2013 | All causes provided by the National Administrative Department of Statistics DANE                           | Mean daily temperature (in °C), computed as 24-hour average based on hourly measurements, were obtained from Instituto de Hidrología, Meteorología y Estudios Ambientales de Colombia (IDEAM)                                       | Missing data amount for 0.00% and 3.98% of the mortality and temperature series, respectively.                                                                                                                    |
| <i>Costa Rica</i>     | 1 city                      | 2000-2017 | All causes provided by the Instituto Nacional de Estadística y Censo. Open Access.                         | Meteorological data were obtained from WMO-NOAA (Surface Data Hourly Global, DS3505)                                                                                                                                                | Missing data amount for 0.00% and 0.97% of the mortality and temperature series, respectively.                                                                                                                    |
| <i>Czech Republic</i> | 3 cities and 1 rural region | 1994-2015 | All causes provided by the Czech Statistical Office and the Institute of Health Information and Statistics | Meteorological data (temperature and relative humidity) were obtained from stations operated by the Czech Hydrometeorological Institute (measurements in standard climatic terms 7:00, 14:00 and 21:00 local time, and daily means) | Missing data amount for 0.00% and 0.00% of the mortality and temperature series, respectively.                                                                                                                    |
| <i>Ecuador</i>        | 2 cities                    | 2014-2016 | All causes provided by the Instituto Nacional de Estadística y Censos                                      | Meteorological data were obtained from WMO-NOAA (Surface Data Hourly Global, DS3505)                                                                                                                                                | Missing data amount for 0.00% and 4.33% of the mortality and temperature series, respectively.                                                                                                                    |
| <i>Estonia</i>        | 4 cities and 1 region       | 1997-2015 | All causes provided by <i>Estonian Causes of Death Registry</i>                                            | Mean daily temperature (in °C) and relative humidity (%) were computed as the 24-h average of hourly measurements collected from <i>Estonian Environment Agency</i> .                                                               | Missing data amount for 0.0% and 0.0% of the mortality and temperature series, respectively.                                                                                                                      |
| <i>Finland</i>        | 1 metropolitan area         | 1994-2014 | All causes provided by Statistics Finland                                                                  | Mean daily temperature (in °C), Finnish                                                                                                                                                                                             | Missing data amount for                                                                                                                                                                                           |

|                          |                                                                                    |           |                                                                                                                                                                              |                                                                                                                                                                                                                                                                                     |                                                                                                |
|--------------------------|------------------------------------------------------------------------------------|-----------|------------------------------------------------------------------------------------------------------------------------------------------------------------------------------|-------------------------------------------------------------------------------------------------------------------------------------------------------------------------------------------------------------------------------------------------------------------------------------|------------------------------------------------------------------------------------------------|
|                          |                                                                                    |           |                                                                                                                                                                              | Meteorological Institute. The weather stations around the country were interpolated onto a 10×10 km grid covering the whole of Finland, using a Kriging model.                                                                                                                      | 0.00% and 4.88% of the mortality and temperature series, respectively.                         |
| <i>France</i>            | 18 cities                                                                          | 2000-2014 | All causes provided by French National Institute of Health and Medical Research (CepiDC),                                                                                    | Mean daily temperature (in °C), computed as the mean of the minimal and maximal temperature, were obtained from the Meteo France. A single weather station was selected for each city.                                                                                              | Missing data amount for 0.25% and 0.04% of the mortality and temperature series, respectively. |
| <i>Germany</i>           | 12 cities                                                                          | 1993-2015 | All causes provided by Research Data Centres of the Federation and the Federal States of Germany (Forschungsdatenzentrum der Statistischen Ämter des Bundes und der Länder), | Mean daily temperature (in °C), computed as the 24-h average based on hourly measurements, was obtained from the Climate Data Centre of the German National Meteorological Service (Deutscher Wetterdienst).                                                                        | Missing data amount for 0.00% and 0.00% of the mortality and temperature series, respectively. |
| <i>Greece</i>            | 1 city                                                                             | 2001-2010 | All causes provided by Hellenic Statistical Authority                                                                                                                        | Mean daily temperature (in °C) and relative humidity (%) were computed as the 24-h average based on hourly measurements collected from the National observatory of Athens ( <a href="http://www.noa.gr/">http://www.noa.gr/</a> ) from site "Thisio" located in the city of Athens. | Missing data amount for 0.00% and 7.05% of the mortality and temperature series, respectively. |
| <i>Guatemala</i>         | 1 city                                                                             | 2009-2016 | All causes provided by the Instituto Nacional de Estadística, Unidad de Estadística de Salud.                                                                                | Temperature data are provided by the Instituto Nacional de Sismología, Vulcanología, Meteorología y Hidrología.                                                                                                                                                                     | Missing data amount for 0.00% and 2.15% of the mortality and temperature series, respectively. |
| <i>Island of Ireland</i> | 4 regions covering all Island population (ROI) and 2 in the Northern Ireland (NI)) | 1991-2007 | Non-external causes only (ICD-9: 0-799; ICD-10: A00-R99) provided by Irish Central Statistics Office Northern and Ireland Social Research Agency.                            | Mean daily temperature (in °C) and relative humidity (in %), computed as the 24-hour average based on hourly measurements, were obtained from two weather stations for each ROI regions and NI regions from Met Eireann, and the United Kingdom Meteorological Office.              | Missing data amount for 0.01% and 0.00% of the mortality and temperature series, respectively  |
| <i>Iran</i>              | 1 city                                                                             | 2004-2013 | All causes provided by the Ferdows organization of Mashhad Municipality                                                                                                      | Mean, Max, Min daily temperature (in °C) and relative humidity (in %), computed as the 24-hour average based on hourly measurements                                                                                                                                                 | Missing data amount for 0.00% and 0.00% of the mortality and temperature                       |

|                    |                       |           |                                                                                                                                             |                                                                                                                                                                                                                                                                                            |                                                                                                                                                                                                                                                     |
|--------------------|-----------------------|-----------|---------------------------------------------------------------------------------------------------------------------------------------------|--------------------------------------------------------------------------------------------------------------------------------------------------------------------------------------------------------------------------------------------------------------------------------------------|-----------------------------------------------------------------------------------------------------------------------------------------------------------------------------------------------------------------------------------------------------|
|                    |                       |           |                                                                                                                                             | collected from IRAN Meteorological Organization (IRIMO) ( <a href="http://www.irimo.ir">http://www.irimo.ir</a> )                                                                                                                                                                          | series, respectively                                                                                                                                                                                                                                |
| <i>Italy</i>       | 11 cities             | 1991-2010 | All causes provided by the obtained from local mortality registries and from the rapid mortality surveillance system                        | Mean daily temperature (in °C) was computed as the 24-h average based on 6-h measurements obtained from the Meteorological Service of the Italian Air Force. A single weather station was selected for each city, using the airport monitoring station located closest to the city center. | Missing data amount for 1.26% and 2.34% of the mortality and temperature series, respectively. Data on 12 cities were initially collected, but 1 (Rieti) was excluded because of potential problems in data collection (strange temporal patterns). |
| <i>Japan</i>       | 47 prefectures        | 1991-2015 | All causes provided by Ministry of Health, Labour and Welfare.                                                                              | Weather station located within the urban area of the capital city (Japan Meteorology Agency)                                                                                                                                                                                               | Missing data amount for 0.00% and 0.04% of the mortality and temperature series, respectively                                                                                                                                                       |
| <i>South Korea</i> | 36 cities             | 1997-2016 | All causes provided by Korea Bureau of Statistics                                                                                           | Mean daily temperature (in °C) and relative humidity (in %), computed as the 24-hour average based on hourly measurements, were obtained from weather stations located within the urban area managed by Korea Meteorological Administration.                                               | Missing data amount for 0.00% and 0.01% of the mortality and temperature series, respectively                                                                                                                                                       |
| <i>Kuwait</i>      | 1 city                | 2000-2016 | Non-external causes only (ICD-9: 0-799; ICD-10: A00-R99) provided by the National Center for Health Information, Ministry of Health, Kuwait | Mean daily temperature (in °C) and relative humidity. (in %), computed as the 24-hour average based on hourly measurements from two sources: the Directorate General of Civil Aviation (Kuwait Airport) and Kuwait's Environmental Public Authority.                                       | Missing data amount for 0.00% and 0.00% of the mortality and temperature series, respectively                                                                                                                                                       |
| <i>Mexico</i>      | 10 metropolitan areas | 1998-2014 | All causes provided by National Institute of Statistics, Geography and Informatics                                                          | Mean daily temperature (in °C) and relative humidity (%) were computed as the 24-hour average based on hourly measurements collected through the Servicio Meteorológico Nacional (SMN) and                                                                                                 | Missing data amount for 0.00% and 27.03% of the mortality and temperature series, respectively                                                                                                                                                      |

|                        |            |           |                                                                                                                                                                                 |                                                                                                                                                                                                                                   |                                                                                                |
|------------------------|------------|-----------|---------------------------------------------------------------------------------------------------------------------------------------------------------------------------------|-----------------------------------------------------------------------------------------------------------------------------------------------------------------------------------------------------------------------------------|------------------------------------------------------------------------------------------------|
|                        |            |           |                                                                                                                                                                                 | the Instituto Nacional de Ecología y Cambio Climático (INECC).                                                                                                                                                                    |                                                                                                |
| <i>Moldova</i>         | 4 cities   | 2001-2010 | All causes provided by National Centre for Health Management                                                                                                                    | Mean daily temperature (in °C) computed as the average between daily minimum and maximum, were obtained from State Hydrometeorological Service, Moldova. A single weather station was selected for each city                      | Missing data amount for 0.00% and 0.00% of the mortality and temperature series, respectively  |
| <i>The Netherlands</i> | 4 regions  | 1995-2016 | All causes provided by Statistics Netherlands                                                                                                                                   | Mean daily temperature (in °C) and relative humidity (%) were obtained from the Royal Dutch Meteorological Institute (KNMI) as 24-hour average based on hourly measurements                                                       | Missing data amount for 0.00% and 0.00% of the mortality and temperature series, respectively  |
| <i>Norway</i>          | 1 city     | 1991-2016 | All causes provided by Norwegian Cause of Death registry                                                                                                                        | Mean daily temperature (in °C) based on an observational modeled dataset from the Norwegian Meteorological Institute.                                                                                                             | Missing data amount for 2.02% and 3.85% of the mortality and temperature series, respectively  |
| <i>Panama</i>          | 1 city     | 2013-2016 | All causes provided by Instituto Nacional de Estadística y Censo, Centro de Información Estadística.                                                                            | Temperature data are provided by the Empresa de Transmisión Eléctrica, S.A. (ETESA). Open Access.                                                                                                                                 | Missing data amount for 0.00% and 10.66% of the mortality and temperature series, respectively |
| <i>Paraguay</i>        | 1 city     | 2004-2016 | All causes provided by Ministerio de Salud Pública y Bienestar Social, Dirección General de Información Estratégica en Salud, Subsistema de Información de Estadísticas Vitales | Temperature data are obtained from the Global Historical Climatology Network (NOAA/WMO)                                                                                                                                           | Missing data amount for 0.00% and 0.00% of the mortality and temperature series, respectively  |
| <i>Peru</i>            | 18 regions | 2008-2014 | All causes provided by the Peruvian Ministry of Health (MINSA in Spanish)                                                                                                       | Mean daily temperature (in °C) was obtained from the National Meteorology and Hydrology Service of Peru (SENAMHI in Spanish). A total of 18 weather stations (one station per Region) contributed data to each department series. | Missing data amount for 2.73% and 12.12% of the mortality and temperature series, respectively |
| <i>Philippines</i>     | 4 cities   | 2006-2010 | All causes provided by Philippine Statistics Agency                                                                                                                             | Mean daily temperature (in °C), computed as 24-hour average based on hourly measurements, were obtained from National Oceanic and                                                                                                 | Missing data amount for 0.04% and 0.00% of the mortality and temperature series, respectively  |

|                     |                            |           |                                                                                                                                 |                                                                                                                                                                                                                                                                                 |                                                                                                                                                                                                                                                                         |
|---------------------|----------------------------|-----------|---------------------------------------------------------------------------------------------------------------------------------|---------------------------------------------------------------------------------------------------------------------------------------------------------------------------------------------------------------------------------------------------------------------------------|-------------------------------------------------------------------------------------------------------------------------------------------------------------------------------------------------------------------------------------------------------------------------|
|                     |                            |           |                                                                                                                                 | Atmospheric Administration (NOAA).                                                                                                                                                                                                                                              |                                                                                                                                                                                                                                                                         |
| <i>Portugal</i>     | 5 districts                | 1991-2016 | All causes provided by Statistics Portugal.                                                                                     | Mean daily temperature (in °C) was computed as the 24-hour average based on hourly measurements collected from the National Oceanic and Atmospheric Administration (NOAA)                                                                                                       | Missing data amount for 0.00% and 0.00% of the mortality and temperature series, respectively                                                                                                                                                                           |
| <i>Puerto Rico</i>  | 1 city                     | 2009-2016 | All causes provided by Instituto de Estadísticas Vitales de Puerto Rico, Área de Estadísticas Vitales del Departamento de Salud | Temperature data are obtained from the Global Historical Climatology Network (NOAA/WMO)                                                                                                                                                                                         | Missing data amount for 0.00% and 5.02% of the mortality and temperature series, respectively                                                                                                                                                                           |
| <i>Romania</i>      | 8 cities                   | 1994-2016 | All causes provided by Romanian National Institute of Statistics                                                                | Meteorological data (temperature and relative humidity) were obtained from stations operated by the National Meteorological Administration of Romania (NMA RO) (measurements in standard climatic terms, mean daily) by <a href="https://www.ecad.eu/">https://www.ecad.eu/</a> | Missing data amount for 0.00% and 0.00% of the mortality and temperature series, respectively                                                                                                                                                                           |
| <i>South Africa</i> | 45 district municipalities | 1997-2013 | All causes provided by Statistics South Africa                                                                                  | Mean daily temperature (in °C) was computed as the average between daily minimum and maximum collected from the Agricultural Research Council of South Africa and the National Oceanic and Atmospheric Administration (NOAA).                                                   | Missing data amount for 0.00% and 12.27% of the mortality and temperature series, respectively<br><br>7 locations were excluded because of a high % of missing data or unstable temporal patterns in the mortality data, possibly due to problems with data collection. |
| <i>Spain</i>        | 50 cities                  | 1991-2014 | Non-external causes (ICD-9: 0-799; ICD-10: A00-R99) from the Spain National Institute of Statistics.                            | Mean daily temperature (in °C), computed as the 24-hour average based on hourly measurements, and was obtained from weather stations of the Spain National Meteorology Agency. A single weather station, located within the urban                                               | Missing data amount for 0.00% and 0.84% of the mortality and temperature series, respectively                                                                                                                                                                           |



|                    |                                           |           |                                                                                                                                                |                                                                                                                                                                                                                                                                                                                                                        |                                                                                                                                                                                  |
|--------------------|-------------------------------------------|-----------|------------------------------------------------------------------------------------------------------------------------------------------------|--------------------------------------------------------------------------------------------------------------------------------------------------------------------------------------------------------------------------------------------------------------------------------------------------------------------------------------------------------|----------------------------------------------------------------------------------------------------------------------------------------------------------------------------------|
|                    |                                           |           |                                                                                                                                                | area or at the near airport, was selected for each city                                                                                                                                                                                                                                                                                                |                                                                                                                                                                                  |
| <i>Sweden</i>      | 3 cities                                  | 1991-2016 | All causes provided by the Swedish Cause of Death Register at the Swedish National Board of Health and Welfare                                 | Mean daily temperature (in °C) and relative humidity (%), computed as the 24-hour average based on hourly measurements, were obtained from the Environment and Health Administration.                                                                                                                                                                  | Missing data amount for 0.00% and 2.06% of the mortality and temperature series, respectively                                                                                    |
| <i>Switzerland</i> | 7 cities and 1 metropolitan area (Lugano) | 1995-2013 | Non-external causes only other than accidents (ICD-10codes A00-R99, V01-V99, W00-X59) provided from Federal Office of Statistics (Switzerland) | Mean daily temperature (in °C) and relative humidity (%), computed as the 24-hour average based on hourly measurements, were obtained from the IDAWEB database (a service provided by MeteoSwiss, the Swiss Federal Office of Meteorology and Climatology). A single weather station located within or near the urban area was selected for each city. | Missing data amount for 0.0% and 0.0% of the mortality and temperature series, respectively.                                                                                     |
| <i>Thailand</i>    | 61 regions                                | 1999-2008 | Non-external (ICD-9: 0-799; ICD-10: A00-R99) mortality, provided the Ministry of Public Health, Thailand.                                      | Mean daily temperature (in °C) and relative humidity (in %), computed as the average between daily minimum and maximum, were obtained from the Meteorological Department, Ministry of Information and Communication Technology, Thailand.                                                                                                              | Missing data amount for 0.00% and 4.99% of the mortality and temperature series, respectively. The region of Phetchabun was excluded because of high percentage of missing data. |
| <i>Taiwan</i>      | 3 cities                                  | 1994-2014 | All causes provided by the Department of Health in Taiwan                                                                                      | Mean daily temperature (in °C) and relative humidity (%) were computed as the 24-hour average based on hourly measurements provided by air quality monitoring stations by the Taiwan Environmental Protection Agency                                                                                                                                   | Missing data amount for 0.03% and 0.00% of the mortality and temperature series, respectively.                                                                                   |
| <i>UK</i>          | 70 built-up areas                         | 1991-2016 | All causes provided by the Office of National Statistics.                                                                                      | Mean daily temperature (in °C) and relative humidity (%) were computed as the 24-hour average based on hourly measurements from UKCP09 5kmx5km product                                                                                                                                                                                                 | Missing data amount for 0.00% and 0.00% of the mortality and temperature series, respectively                                                                                    |
| <i>Uruguay</i>     | 1 city                                    | 2012-2016 | Non-external causes are provided by the                                                                                                        | Temperature data are provided by the Instituto                                                                                                                                                                                                                                                                                                         | Missing data amount for                                                                                                                                                          |

|                |            |           |                                                         |                                                                                                                                                                                                                                                                                                       |                                                                                                                                                                          |
|----------------|------------|-----------|---------------------------------------------------------|-------------------------------------------------------------------------------------------------------------------------------------------------------------------------------------------------------------------------------------------------------------------------------------------------------|--------------------------------------------------------------------------------------------------------------------------------------------------------------------------|
|                |            |           | Ministerio de Salud Publica (MSP).                      | Uruguayo de Meteorología (INUMET)                                                                                                                                                                                                                                                                     | 0.00% and 0.00% of the mortality and temperature series, respectively                                                                                                    |
| <i>USA</i>     | 210 cities | 1991-2006 | All causes provided by                                  | Mean daily temperature (in °C) and relative humidity (%), computed as the 24-hour average based on hourly measurements, were obtained from the National Climatic Data Center (NCDC) of the National Oceanic and Atmospheric Administration (NOAA).                                                    | Missing data amount for 2.65% and 2.70% of the mortality and temperature series, respectively.<br><br>1 city was excluded (Nampa) because of high percentage of missing. |
| <i>Vietnam</i> | 2 cities   | 2009-2013 | All causes provided by Provincial Department of Health. | Mean daily temperature (in °C), and relative humidity (in %) computed as computed from the 24-h average of hourly measurements, were obtained from National Oceanic and Atmospheric Administration's (NOAA) National Climate Data Center (NCDC). A single weather station was selected for each city. | Missing data amount for 0.00% and 0.57% of the mortality and temperature series, respectively                                                                            |

**Supplementary Table2.** Description of the location-specific data included in the Multi-country Multi-city (MCC) Collaborative Network database.

| Location           | Country   | Study Period | Warm period (months) | Total deaths | Median mean daily temperature [IQR] |
|--------------------|-----------|--------------|----------------------|--------------|-------------------------------------|
| Buenos Aires       | Argentina | 2005 - 2015  | 12 - 3               | 130575       | 23.8 [21.5 - 25.9]                  |
| Cordoba            | Argentina | 2005 - 2015  | 11 - 2               | 37189        | 23.9 [21.9 - 26.2]                  |
| Rosario            | Argentina | 2005 - 2015  | 11 - 2               | 37887        | 23.8 [21.7 - 25.8]                  |
| Brisbane           | Australia | 1991 - 2009  | 12 - 3               | 51863        | 24.1 [22.9 - 25.5]                  |
| Melbourne          | Australia | 1991 - 2009  | 12 - 3               | 121265       | 19.1 [17.1 - 22.4]                  |
| Sydney             | Australia | 1991 - 2009  | 12 - 3               | 138057       | 22.2 [20.6 - 23.8]                  |
| Belem              | Brazil    | 1997 - 2011  | 8 - 11               | 42837        | 27.4 [26.9 - 27.8]                  |
| Belo Horizonte     | Brazil    | 1997 - 2011  | 12 - 3               | 150216       | 23.6 [22.3 - 24.8]                  |
| Brasilia           | Brazil    | 1997 - 2011  | 9 - 12               | 37960        | 22.0 [21.0 - 23.5]                  |
| Curitiba           | Brazil    | 1997 - 2011  | 12 - 3               | 47278        | 21.1 [19.3 - 22.5]                  |
| Cuiaba             | Brazil    | 1997 - 2011  | 9 - 12               | 16659        | 27.9 [26.6 - 29.2]                  |
| Fortaleza          | Brazil    | 1997 - 2011  | 10 - 1               | 65341        | 27.7 [27.3 - 28.0]                  |
| Goiania            | Brazil    | 1997 - 2011  | 8 - 11               | 44935        | 25.4 [24.2 - 26.8]                  |
| Joao Pessoa        | Brazil    | 1997 - 2011  | 12 - 3               | 17525        | 28.1 [27.7 - 28.5]                  |
| Maceio             | Brazil    | 1997 - 2011  | 12 - 3               | 30648        | 26.3 [25.6 - 26.9]                  |
| Manaus             | Brazil    | 1997 - 2011  | 8 - 11               | 31989        | 28.2 [27.1 - 29.2]                  |
| Natal              | Brazil    | 1997 - 2011  | 12 - 3               | 26323        | 27.6 [27.0 - 28.0]                  |
| Porto Alegre       | Brazil    | 1997 - 2011  | 12 - 3               | 66822        | 24.2 [22.6 - 25.7]                  |
| Recife             | Brazil    | 1997 - 2011  | 12 - 3               | 85922        | 27.3 [26.8 - 27.7]                  |
| Sao Luis           | Brazil    | 1997 - 2011  | 9 - 12               | 26123        | 27.6 [27.3 - 27.9]                  |
| Salvador           | Brazil    | 1997 - 2011  | 12 - 3               | 73998        | 27.1 [26.5 - 27.6]                  |
| Sao Paulo          | Brazil    | 1997 - 2011  | 12 - 3               | 287993       | 23.0 [21.4 - 24.4]                  |
| Teresina           | Brazil    | 1997 - 2011  | 9 - 12               | 21556        | 29.2 [28.3 - 30.0]                  |
| Vitoria            | Brazil    | 1997 - 2011  | 12 - 3               | 17165        | 27.1 [25.9 - 28.0]                  |
| Abbotsford         | Canada    | 1991 - 2015  | 6 - 9                | 14268        | 17.1 [15.2 - 19.0]                  |
| Calgary            | Canada    | 1991 - 2015  | 6 - 9                | 44495        | 14.8 [11.7 - 17.3]                  |
| Edmonton           | Canada    | 1991 - 2015  | 6 - 9                | 51453        | 14.9 [12.2 - 17.4]                  |
| Halifax            | Canada    | 1991 - 2015  | 6 - 9                | 22054        | 17.6 [14.9 - 19.8]                  |
| Hamilton           | Canada    | 1991 - 2015  | 6 - 9                | 33127        | 19.3 [16.6 - 21.8]                  |
| Kingston           | Canada    | 1991 - 2015  | 6 - 9                | 14370        | 19.1 [16.6 - 21.5]                  |
| Kitchener-Waterloo | Canada    | 1991 - 2015  | 6 - 9                | 22131        | 18.1 [15.5 - 20.8]                  |
| London Ontario     | Canada    | 1991 - 2015  | 6 - 9                | 27677        | 19.1 [16.5 - 21.6]                  |
| Montreal           | Canada    | 1991 - 2015  | 6 - 9                | 117348       | 19.7 [16.9 - 22.2]                  |
| Niagara            | Canada    | 1991 - 2015  | 6 - 9                | 31237        | 20.4 [17.9 - 23.1]                  |
| Oakville           | Canada    | 1991 - 2015  | 6 - 9                | 19756        | 19.9 [17.3 - 22.4]                  |
| Oshawa             | Canada    | 1991 - 2015  | 6 - 9                | 24593        | 19.0 [16.5 - 21.2]                  |
| Ottawa             | Canada    | 1991 - 2015  | 6 - 9                | 48063        | 19.1 [16.4 - 21.6]                  |
| Regina             | Canada    | 1991 - 2015  | 6 - 9                | 15399        | 16.5 [13.3 - 19.3]                  |
| Sarnia             | Canada    | 1991 - 2015  | 6 - 9                | 9128         | 19.3 [16.6 - 22.0]                  |
| Sudbury            | Canada    | 1991 - 2015  | 6 - 9                | 12728        | 17.1 [14.2 - 19.8]                  |
| Saint John NB      | Canada    | 1991 - 2015  | 6 - 9                | 13408        | 15.8 [13.5 - 17.7]                  |
| St. John's NFL     | Canada    | 1991 - 2015  | 6 - 9                | 16972        | 14.5 [11.2 - 17.4]                  |

|                   |                |             |        |        |                    |
|-------------------|----------------|-------------|--------|--------|--------------------|
| Sault Ste. Marie  | Canada         | 1991 - 2015 | 6 - 9  | 9506   | 16.4 [13.6 - 19.1] |
| Saskatoon         | Canada         | 1991 - 2015 | 6 - 9  | 17894  | 16.2 [13.1 - 19.0] |
| Thunder Bay       | Canada         | 1991 - 2015 | 6 - 9  | 11033  | 15.7 [12.9 - 18.3] |
| Toronto           | Canada         | 1991 - 2015 | 6 - 9  | 219328 | 19.8 [17.3 - 22.2] |
| Victoria          | Canada         | 1991 - 2015 | 6 - 9  | 25798  | 15.8 [14.4 - 17.2] |
| Vancouver         | Canada         | 1991 - 2015 | 6 - 9  | 102921 | 17.1 [15.3 - 18.8] |
| Windsor           | Canada         | 1991 - 2015 | 6 - 9  | 22685  | 21.3 [18.5 - 23.8] |
| Winnipeg          | Canada         | 1991 - 2015 | 6 - 9  | 52194  | 18.0 [14.7 - 20.8] |
| Anshan            | China          | 2004 - 2006 | 6 - 9  | 9404   | 24.3 [22.1 - 26.1] |
| Beijing           | China          | 2007 - 2015 | 5 - 8  | 52416  | 25.8 [23.1 - 27.5] |
| Fuzhou            | China          | 2004 - 2006 | 6 - 9  | 5422   | 28.5 [26.2 - 30.1] |
| Hong Kong         | China          | 1996 - 2002 | 6 - 9  | 67289  | 28.7 [27.4 - 29.5] |
| Hangzhou          | China          | 2002 - 2004 | 6 - 9  | 6370   | 26.7 [24.1 - 29.5] |
| Lanzhou           | China          | 2004 - 2008 | 5 - 8  | 10612  | 18.0 [16.0 - 20.0] |
| Shanghai          | China          | 2001 - 2015 | 6 - 9  | 85669  | 26.5 [24.2 - 29.6] |
| Shenyang          | China          | 2005 - 2008 | 6 - 9  | 30197  | 22.0 [20.0 - 24.0] |
| Suzhu             | China          | 2005 - 2008 | 6 - 9  | 14563  | 27.4 [24.7 - 29.5] |
| Taiyuan           | China          | 2004 - 2008 | 5 - 8  | 13879  | 22.5 [20.1 - 25.0] |
| Tianjin           | China          | 2005 - 2008 | 6 - 9  | 4814   | 25.5 [23.1 - 27.2] |
| Wulumuqi          | China          | 2006 - 2007 | 6 - 9  | 4048   | 22.4 [19.6 - 25.5] |
| Wuhan             | China          | 2003 - 2005 | 6 - 9  | 17896  | 27.5 [24.9 - 30.5] |
| Xian              | China          | 2004 - 2008 | 5 - 8  | 14321  | 24.0 [22.0 - 26.0] |
| Chillan           | Chile          | 2008 - 2014 | 12 - 3 | 2629   | 18.8 [16.7 - 20.6] |
| Santiago          | Chile          | 2008 - 2014 | 12 - 3 | 76168  | 21.3 [19.4 - 22.7] |
| Temuco            | Chile          | 2004 - 2013 | 12 - 3 | 5001   | 15.5 [14.0 - 17.0] |
| Valparaiso        | Chile          | 2004 - 2013 | 12 - 3 | 14230  | 17.5 [16.4 - 18.6] |
| Bogota            | Colombia       | 1998 - 2013 | 3 - 6  | 143479 | 14.1 [13.4 - 14.8] |
| Barranquilla      | Colombia       | 1998 - 2013 | 5 - 8  | 31965  | 28.4 [27.7 - 28.9] |
| Cali              | Colombia       | 1998 - 2013 | 6 - 9  | 62269  | 24.9 [24.0 - 25.7] |
| Cartagena         | Colombia       | 1998 - 2013 | 5 - 8  | 18437  | 28.8 [28.2 - 29.3] |
| Medellin          | Colombia       | 1998 - 2013 | 5 - 8  | 66600  | 23.3 [22.1 - 24.5] |
| San José (CR)     | Costa Rica     | 2000 - 2017 | 2 - 5  | 10093  | 23.3 [22.7 - 24.0] |
| Brno              | Czech Republic | 1994 - 2015 | 5 - 8  | 28506  | 18.7 [15.6 - 21.5] |
| Ostrava           | Czech Republic | 1994 - 2015 | 5 - 8  | 24826  | 17.6 [14.9 - 20.3] |
| Prague            | Czech Republic | 1994 - 2015 | 6 - 9  | 91436  | 16.9 [14.0 - 19.9] |
| South Bohemia     | Czech Republic | 1994 - 2015 | 5 - 8  | 81877  | 16.5 [13.6 - 19.4] |
| Guayaquil         | Ecuador        | 2014 - 2016 | 2 - 5  | 13389  | 27.6 [26.9 - 28.2] |
| Quito             | Ecuador        | 2014 - 2016 | 1 - 4  | 8340   | 15.8 [15.2 - 16.5] |
| Kohtla-Järve linn | Estonia        | 1997 - 2015 | 6 - 9  | 4871   | 14.9 [12.6 - 17.5] |
| Narva linn        | Estonia        | 1997 - 2015 | 6 - 9  | 4853   | 14.9 [12.6 - 17.5] |
| Pärnu linn        | Estonia        | 1997 - 2015 | 6 - 9  | 3943   | 16.0 [13.7 - 18.2] |
| Tallinn           | Estonia        | 1997 - 2015 | 6 - 9  | 26435  | 15.4 [13.0 - 17.6] |
| Tartu linn        | Estonia        | 1997 - 2015 | 6 - 9  | 5992   | 16.0 [13.7 - 18.2] |
| Helsinki          | Finland        | 1994 - 2014 | 6 - 9  | 48810  | 15.7 [13.2 - 18.1] |
| Bordeaux          | France         | 2000 - 2014 | 6 - 9  | 22891  | 20.0 [17.9 - 22.2] |
| Clermont-Ferrand  | France         | 2000 - 2014 | 6 - 9  | 10306  | 18.8 [16.4 - 21.4] |

|                                      |           |             |       |        |                    |
|--------------------------------------|-----------|-------------|-------|--------|--------------------|
| Dijon                                | France    | 2000 - 2014 | 6 - 9 | 8204   | 18.6 [16.4 - 21.2] |
| Grenoble                             | France    | 2000 - 2014 | 6 - 9 | 14365  | 18.7 [16.2 - 21.3] |
| Le Havre                             | France    | 2000 - 2014 | 6 - 9 | 10258  | 16.7 [15.3 - 18.1] |
| Lille                                | France    | 2000 - 2014 | 6 - 9 | 38119  | 17.1 [15.2 - 19.0] |
| Lens-Douai                           | France    | 2000 - 2014 | 6 - 9 | 15323  | 17.1 [15.2 - 19.0] |
| Lyon                                 | France    | 2000 - 2014 | 6 - 9 | 33066  | 20.4 [17.9 - 23.3] |
| Montpellier                          | France    | 2000 - 2014 | 6 - 9 | 11672  | 22.6 [20.7 - 24.6] |
| Marseille                            | France    | 2000 - 2014 | 6 - 9 | 39761  | 23.5 [21.1 - 25.3] |
| Nice                                 | France    | 2000 - 2014 | 6 - 9 | 21727  | 23.0 [21.2 - 24.6] |
| Nancy                                | France    | 2000 - 2014 | 6 - 9 | 12472  | 18.0 [15.7 - 20.7] |
| Nantes                               | France    | 2000 - 2014 | 6 - 9 | 18815  | 18.1 [16.4 - 20.2] |
| Paris                                | France    | 2000 - 2014 | 6 - 9 | 194271 | 18.9 [16.7 - 21.2] |
| Rennes                               | France    | 2000 - 2014 | 6 - 9 | 7107   | 17.8 [16.0 - 19.7] |
| Rouen                                | France    | 2000 - 2014 | 6 - 9 | 17755  | 16.4 [14.6 - 18.4] |
| Strasbourg                           | France    | 2000 - 2014 | 6 - 9 | 15263  | 18.6 [16.3 - 21.2] |
| Toulouse                             | France    | 2000 - 2014 | 6 - 9 | 21536  | 21.1 [18.7 - 23.5] |
| Berlin                               | Germany   | 1993 - 2015 | 6 - 9 | 254786 | 17.9 [15.2 - 20.7] |
| Bremen                               | Germany   | 1993 - 2015 | 6 - 9 | 47405  | 16.2 [14.0 - 18.9] |
| Dresden                              | Germany   | 1993 - 2015 | 6 - 9 | 39458  | 17.2 [14.5 - 20.2] |
| Dortmund                             | Germany   | 1993 - 2015 | 6 - 9 | 48541  | 16.7 [14.3 - 19.4] |
| Duesseldorf                          | Germany   | 1993 - 2015 | 6 - 9 | 50585  | 17.1 [14.8 - 19.8] |
| Frankfurt                            | Germany   | 1993 - 2015 | 6 - 9 | 52555  | 18.3 [15.7 - 21.1] |
| Hamburg                              | Germany   | 1993 - 2015 | 6 - 9 | 139251 | 16.6 [14.3 - 19.2] |
| Hannover                             | Germany   | 1993 - 2015 | 6 - 9 | 87591  | 16.6 [14.2 - 19.3] |
| Koeln                                | Germany   | 1993 - 2015 | 6 - 9 | 71784  | 16.9 [14.5 - 19.6] |
| Leipzig                              | Germany   | 1993 - 2015 | 6 - 9 | 48227  | 17.5 [14.8 - 20.2] |
| Muenchen                             | Germany   | 1993 - 2015 | 5 - 8 | 92286  | 17.7 [14.7 - 20.7] |
| Stuttgart                            | Germany   | 1993 - 2015 | 6 - 9 | 42960  | 17.9 [15.2 - 20.9] |
| Athens                               | Greece    | 2001 - 2010 | 6 - 9 | 90845  | 27.6 [24.6 - 29.6] |
| Guatemala                            | Guatemala | 2009 - 2016 | 4 - 7 | 20826  | 20.5 [19.7 - 21.2] |
| East of Northern Ireland             | Ireland   | 1991 - 2007 | 6 - 9 | 46104  | 13.8 [12.4 - 15.2] |
| NorthEast of the Republic of Ireland | Ireland   | 1991 - 2007 | 6 - 9 | 23626  | 14.5 [12.9 - 16.0] |
| NorthWest of the Republic of Ireland | Ireland   | 1991 - 2007 | 6 - 9 | 15260  | 13.9 [12.7 - 15.2] |
| SouthEast of Republic of Ireland     | Ireland   | 1991 - 2007 | 6 - 9 | 52489  | 14.2 [12.8 - 16.0] |
| SouthWest of the Republic of Ireland | Ireland   | 1991 - 2007 | 6 - 9 | 56832  | 14.8 [13.6 - 16.0] |
| West of Northern Ireland             | Ireland   | 1991 - 2007 | 6 - 9 | 27917  | 14.4 [13.0 - 16.0] |
| Mashhad                              | Iran      | 2004 - 2013 | 6 - 9 | 40824  | 26.4 [24.0 - 28.3] |
| Bari                                 | Italy     | 1996 - 2007 | 6 - 9 | 9487   | 23.6 [21.0 - 25.7] |
| Bologna                              | Italy     | 1996 - 2010 | 6 - 9 | 17787  | 24.4 [21.1 - 26.8] |
| Brescia                              | Italy     | 1993 - 2003 | 5 - 8 | 6813   | 22.8 [20.0 - 25.1] |
| Civitavecchia                        | Italy     | 1996 - 2006 | 6 - 9 | 1169   | 23.9 [22.3 - 25.5] |
| Frosinone                            | Italy     | 1995 - 2006 | 6 - 9 | 996    | 23.5 [20.9 - 25.9] |

|           |       |             |       |        |                    |
|-----------|-------|-------------|-------|--------|--------------------|
| Genoa     | Italy | 1999 - 2007 | 6 - 9 | 21779  | 23.1 [21.6 - 25.0] |
| Latina    | Italy | 1995 - 2006 | 6 - 9 | 2532   | 23.7 [21.5 - 25.8] |
| Palermo   | Italy | 1997 - 2001 | 6 - 9 | 8009   | 25.3 [22.9 - 27.1] |
| Rome      | Italy | 1991 - 2010 | 6 - 9 | 133265 | 23.4 [21.1 - 25.6] |
| Turin     | Italy | 1991 - 1999 | 6 - 9 | 20441  | 21.0 [18.0 - 23.3] |
| Viterbo   | Italy | 1995 - 2006 | 6 - 9 | 1898   | 22.5 [19.7 - 25.1] |
| Aichi     | Japan | 1991 - 2015 | 6 - 9 | 376191 | 25.7 [23.2 - 28.1] |
| Akita     | Japan | 1991 - 2015 | 6 - 9 | 96586  | 22.2 [19.9 - 24.5] |
| Aomori    | Japan | 1991 - 2015 | 6 - 9 | 109936 | 20.6 [18.1 - 22.9] |
| Chiba     | Japan | 1991 - 2015 | 6 - 9 | 316010 | 24.7 [22.1 - 27.4] |
| Ehime     | Japan | 1991 - 2015 | 6 - 9 | 110585 | 25.9 [23.3 - 28.2] |
| Fukushima | Japan | 1991 - 2015 | 6 - 9 | 148267 | 22.9 [20.1 - 25.7] |
| Fukuoka   | Japan | 1991 - 2015 | 6 - 9 | 312777 | 25.9 [23.4 - 28.5] |
| Fukui     | Japan | 1991 - 2015 | 6 - 9 | 55829  | 24.5 [22.0 - 27.3] |
| Gifu      | Japan | 1991 - 2015 | 6 - 9 | 132418 | 25.7 [23.3 - 28.2] |
| Gunma     | Japan | 1991 - 2015 | 6 - 9 | 131133 | 24.4 [21.6 - 27.2] |
| Hokkaido  | Japan | 1991 - 2015 | 6 - 9 | 378813 | 19.8 [17.4 - 22.1] |
| Hiroshima | Japan | 1991 - 2015 | 6 - 9 | 186024 | 25.9 [23.6 - 28.4] |
| Hyogo     | Japan | 1991 - 2015 | 6 - 9 | 339847 | 26.1 [23.7 - 28.3] |
| Ibaraki   | Japan | 1991 - 2015 | 6 - 9 | 185070 | 22.9 [20.2 - 25.7] |
| Ishikawa  | Japan | 1991 - 2015 | 6 - 9 | 77434  | 24.4 [21.8 - 27.2] |
| Iwate     | Japan | 1991 - 2015 | 6 - 9 | 103352 | 20.9 [18.4 - 23.5] |
| Kagawa    | Japan | 1991 - 2015 | 6 - 9 | 73062  | 26.2 [23.7 - 28.5] |
| Kagoshima | Japan | 1991 - 2015 | 6 - 9 | 138289 | 27.4 [24.8 - 28.9] |
| Kumamoto  | Japan | 1991 - 2015 | 6 - 9 | 128335 | 26.5 [24.1 - 28.4] |
| Kanagawa  | Japan | 1991 - 2015 | 6 - 9 | 432426 | 24.7 [22.0 - 27.3] |
| Kochi     | Japan | 1991 - 2015 | 6 - 9 | 66278  | 26.1 [23.8 - 27.8] |
| Kyoto     | Japan | 1991 - 2015 | 6 - 9 | 162390 | 25.9 [23.4 - 28.5] |
| Mie       | Japan | 1991 - 2015 | 6 - 9 | 121901 | 25.6 [23.1 - 27.8] |
| Miyagi    | Japan | 1991 - 2015 | 6 - 9 | 139393 | 21.7 [19.2 - 24.4] |
| Miyazaki  | Japan | 1991 - 2015 | 6 - 9 | 81520  | 26.3 [23.7 - 27.9] |
| Nagano    | Japan | 1991 - 2015 | 6 - 9 | 152729 | 22.8 [20.4 - 25.3] |
| Nara      | Japan | 1991 - 2015 | 6 - 9 | 85094  | 24.8 [22.3 - 27.2] |
| Nagasaki  | Japan | 1991 - 2015 | 6 - 9 | 109795 | 26.0 [23.6 - 27.9] |
| Niigata   | Japan | 1991 - 2015 | 6 - 9 | 176903 | 23.7 [21.3 - 26.2] |
| Oita      | Japan | 1991 - 2015 | 6 - 9 | 89202  | 25.5 [23.1 - 27.7] |
| Okinawa   | Japan | 1991 - 2015 | 6 - 9 | 69396  | 28.6 [27.6 - 29.3] |
| Okayama   | Japan | 1991 - 2015 | 6 - 9 | 134112 | 26.1 [23.6 - 28.6] |
| Osaka     | Japan | 1991 - 2015 | 6 - 9 | 509037 | 26.6 [24.0 - 29.0] |
| Saga      | Japan | 1991 - 2015 | 6 - 9 | 62229  | 25.9 [23.7 - 28.2] |
| Saitama   | Japan | 1991 - 2015 | 6 - 9 | 346364 | 24.7 [21.9 - 27.5] |
| Shiga     | Japan | 1991 - 2015 | 6 - 9 | 75148  | 24.8 [22.2 - 27.3] |
| Shimane   | Japan | 1991 - 2015 | 6 - 9 | 61427  | 24.2 [21.7 - 27.0] |
| Shizuoka  | Japan | 1991 - 2015 | 6 - 9 | 228861 | 25.3 [22.7 - 27.3] |
| Tochigi   | Japan | 1991 - 2015 | 6 - 9 | 126176 | 23.6 [21.0 - 26.3] |
| Tokushima | Japan | 1991 - 2015 | 6 - 9 | 62859  | 25.9 [23.5 - 27.9] |

|               |             |             |       |        |                    |
|---------------|-------------|-------------|-------|--------|--------------------|
| Tokyo         | Japan       | 1991 - 2015 | 6 - 9 | 690488 | 25.3 [22.6 - 28.1] |
| Toyama        | Japan       | 1991 - 2015 | 6 - 9 | 80597  | 24.0 [21.5 - 26.8] |
| Tottori       | Japan       | 1991 - 2015 | 6 - 9 | 46073  | 24.5 [21.9 - 27.4] |
| Wakayama      | Japan       | 1991 - 2015 | 6 - 9 | 80813  | 26.3 [23.7 - 28.3] |
| Yamaguchi     | Japan       | 1991 - 2015 | 6 - 9 | 118885 | 25.2 [22.9 - 27.5] |
| Yamagata      | Japan       | 1991 - 2015 | 6 - 9 | 95419  | 22.4 [19.9 - 25.0] |
| Yamanashi     | Japan       | 1991 - 2015 | 6 - 9 | 59154  | 24.8 [22.3 - 27.1] |
| Andong        | South Korea | 1997 - 2016 | 6 - 9 | 9162   | 23.0 [20.8 - 25.3] |
| Boryeong      | South Korea | 1997 - 2016 | 6 - 9 | 5935   | 23.3 [21.3 - 25.4] |
| Busan         | South Korea | 1997 - 2016 | 6 - 9 | 120380 | 23.4 [21.4 - 25.8] |
| Chuncheon     | South Korea | 1997 - 2016 | 6 - 9 | 9861   | 23.4 [21.1 - 25.3] |
| Chungju       | South Korea | 1997 - 2016 | 6 - 9 | 8962   | 23.3 [21.2 - 25.5] |
| Cheonan       | South Korea | 1997 - 2016 | 6 - 9 | 13520  | 23.3 [21.2 - 25.4] |
| Daegu         | South Korea | 1997 - 2016 | 6 - 9 | 74372  | 24.5 [22.2 - 27.1] |
| Daejeon       | South Korea | 1997 - 2016 | 6 - 9 | 37904  | 24.0 [22.0 - 25.9] |
| Donghae       | South Korea | 1997 - 2016 | 6 - 9 | 4133   | 21.5 [19.5 - 23.9] |
| Geojae        | South Korea | 1997 - 2016 | 6 - 9 | 6026   | 23.4 [21.3 - 25.6] |
| Gangneung     | South Korea | 1997 - 2016 | 6 - 9 | 9457   | 22.4 [20.1 - 25.5] |
| Gumi          | South Korea | 1997 - 2016 | 6 - 9 | 8917   | 23.7 [21.5 - 26.0] |
| Gwangju       | South Korea | 1997 - 2016 | 6 - 9 | 39458  | 24.3 [22.4 - 26.4] |
| Icheon        | South Korea | 1997 - 2016 | 6 - 9 | 6499   | 23.1 [20.9 - 24.9] |
| Incheon       | South Korea | 1997 - 2016 | 6 - 9 | 74369  | 23.4 [21.5 - 25.2] |
| Jecheon       | South Korea | 1997 - 2016 | 6 - 9 | 6235   | 22.0 [19.8 - 24.0] |
| Jeju          | South Korea | 1997 - 2016 | 6 - 9 | 10355  | 24.5 [22.3 - 27.2] |
| Jinju         | South Korea | 1997 - 2016 | 6 - 9 | 11878  | 23.7 [21.5 - 26.0] |
| Jeongeup      | South Korea | 1997 - 2016 | 6 - 9 | 7718   | 24.0 [22.0 - 26.2] |
| Milyang       | South Korea | 1997 - 2016 | 6 - 9 | 6986   | 23.9 [21.9 - 26.2] |
| Mungyeong     | South Korea | 1997 - 2016 | 6 - 9 | 5122   | 22.3 [20.1 - 24.5] |
| Mokpo         | South Korea | 1997 - 2016 | 6 - 9 | 8112   | 23.7 [21.7 - 25.8] |
| Namwon        | South Korea | 1997 - 2016 | 6 - 9 | 5331   | 23.5 [21.6 - 25.7] |
| Pohang        | South Korea | 1997 - 2016 | 6 - 9 | 17513  | 23.4 [21.1 - 26.4] |
| Seoul         | South Korea | 1997 - 2016 | 6 - 9 | 251336 | 24.2 [22.1 - 26.0] |
| Seosan        | South Korea | 1997 - 2016 | 6 - 9 | 6245   | 23.0 [21.1 - 24.9] |
| Seogyupo      | South Korea | 1997 - 2016 | 6 - 9 | 4697   | 24.9 [22.9 - 27.0] |
| Sokcho        | South Korea | 1997 - 2016 | 6 - 9 | 3471   | 21.5 [19.4 - 24.0] |
| Suwon         | South Korea | 1997 - 2016 | 6 - 9 | 23258  | 24.0 [21.9 - 25.8] |
| Taebaek       | South Korea | 1997 - 2016 | 6 - 9 | 2358   | 19.3 [16.9 - 22.2] |
| Tongyeong     | South Korea | 1997 - 2016 | 6 - 9 | 5858   | 23.5 [21.4 - 25.5] |
| Ulsan         | South Korea | 1997 - 2016 | 6 - 9 | 26946  | 23.5 [21.3 - 26.2] |
| Wonju         | South Korea | 1997 - 2016 | 6 - 9 | 10397  | 23.7 [21.5 - 25.6] |
| Yeosu         | South Korea | 1997 - 2016 | 6 - 9 | 11438  | 23.5 [21.6 - 25.6] |
| Yoengcheon    | South Korea | 1997 - 2016 | 6 - 9 | 6652   | 23.0 [20.7 - 25.7] |
| Yeongju       | South Korea | 1997 - 2016 | 6 - 9 | 6281   | 22.4 [20.3 - 24.6] |
| Kuwait        | Kuwait      | 2000 - 2016 | 6 - 9 | 22347  | 38.1 [36.3 - 39.6] |
| Ciudad Juarez | Mexico      | 1998 - 2014 | 5 - 8 | 27546  | 28.0 [25.7 - 29.8] |

|                  |             |             |        |        |                    |
|------------------|-------------|-------------|--------|--------|--------------------|
| Comarca Lagunera | Mexico      | 1998 - 2014 | 5 - 8  | 30863  | 29.2 [27.4 - 30.4] |
| Guadalajara      | Mexico      | 1998 - 2014 | 4 - 7  | 111359 | 23.6 [22.1 - 25.1] |
| Leon             | Mexico      | 1998 - 2014 | 4 - 7  | 34113  | 22.0 [21.0 - 23.0] |
| Monterrey        | Mexico      | 1998 - 2014 | 5 - 8  | 88684  | 27.5 [25.8 - 28.7] |
| Puebla-Tlaxcala  | Mexico      | 1998 - 2014 | 4 - 7  | 63772  | 18.3 [17.3 - 19.7] |
| San Luis Potosi  | Mexico      | 1998 - 2014 | 4 - 7  | 23772  | 20.5 [19.2 - 21.9] |
| Tijuana          | Mexico      | 1998 - 2014 | 7 - 10 | 30540  | 21.0 [19.0 - 23.0] |
| Toluca de Lerdo  | Mexico      | 1998 - 2014 | 4 - 7  | 39976  | 15.5 [14.5 - 16.8] |
| Valley of Mexico | Mexico      | 1998 - 2014 | 4 - 7  | 471086 | 18.0 [16.8 - 19.6] |
| Anenii Noi       | Moldova     | 2003 - 2010 | 5 - 8  | 240    | 20.8 [17.8 - 22.9] |
| Cahul            | Moldova     | 2003 - 2010 | 5 - 8  | 834    | 21.5 [18.5 - 23.8] |
| Chisinau         | Moldova     | 2001 - 2010 | 5 - 8  | 17309  | 21.1 [18.1 - 23.7] |
| Falesti          | Moldova     | 2003 - 2010 | 5 - 8  | 445    | 20.5 [17.8 - 22.7] |
| Noord-Nederland  | Netherland  | 1995 - 2016 | 6 - 9  | 108972 | 15.8 [14.1 - 17.9] |
| Oost-Nederland   | Netherland  | 1995 - 2016 | 6 - 9  | 194605 | 16.3 [14.3 - 18.5] |
| West-Nederland   | Netherland  | 1995 - 2016 | 6 - 9  | 442089 | 16.6 [14.9 - 18.4] |
| Zuid-Nederland   | Netherland  | 1995 - 2016 | 6 - 9  | 207440 | 16.7 [14.6 - 19.0] |
| Oslo             | Norway      | 1991 - 2016 | 6 - 9  | 40054  | 13.6 [11.4 - 15.7] |
| Panama           | Panama      | 2013 - 2016 | 3 - 6  | 3895   | 28.7 [27.9 - 29.4] |
| Asuncion         | Paraguay    | 2004 - 2016 | 12 - 3 | 12665  | 27.2 [25.6 - 28.9] |
| apurimac         | Peru        | 2008 - 2014 | 10 - 1 | 3003   | 16.6 [15.9 - 17.5] |
| arequipa         | Peru        | 2008 - 2014 | 12 - 3 | 10223  | 16.1 [15.3 - 17.0] |
| ayacucho         | Peru        | 2008 - 2014 | 11 - 2 | 3926   | 11.5 [10.9 - 12.2] |
| cajamarca        | Peru        | 2008 - 2014 | 12 - 3 | 7295   | 15.7 [14.9 - 16.4] |
| cusco            | Peru        | 2008 - 2014 | 10 - 1 | 8517   | 14.2 [13.3 - 14.9] |
| huancavelica     | Peru        | 2008 - 2014 | 11 - 2 | 3139   | 5.5 [4.8 - 6.0]    |
| huanuco          | Peru        | 2008 - 2014 | 10 - 1 | 5777   | 21.1 [20.2 - 21.8] |
| ica              | Peru        | 2008 - 2014 | 1 - 4  | 7273   | 25.2 [24.2 - 26.1] |
| junin            | Peru        | 2008 - 2014 | 10 - 1 | 11330  | 14.3 [13.5 - 15.1] |
| lima             | Peru        | 2008 - 2014 | 1 - 4  | 80716  | 21.7 [21.1 - 22.3] |
| la libertad      | Peru        | 2008 - 2014 | 1 - 4  | 15469  | 25.2 [24.4 - 26.0] |
| lambayeque       | Peru        | 2008 - 2014 | 1 - 4  | 11624  | 23.8 [22.5 - 24.8] |
| loreto           | Peru        | 2008 - 2014 | 9 - 12 | 1743   | 27.6 [26.9 - 28.2] |
| piura            | Peru        | 2008 - 2014 | 1 - 4  | 14787  | 28.0 [27.2 - 28.8] |
| puno             | Peru        | 2008 - 2014 | 10 - 1 | 13931  | 11.3 [10.5 - 12.1] |
| san martin       | Peru        | 2008 - 2014 | 10 - 1 | 3530   | 23.5 [22.7 - 24.2] |
| tacna            | Peru        | 2008 - 2014 | 12 - 3 | 2461   | 21.9 [21.1 - 22.8] |
| ucayali          | Peru        | 2008 - 2014 | 8 - 11 | 3316   | 26.6 [25.7 - 27.5] |
| Cebu             | Philippines | 2006 - 2010 | 4 - 7  | 14571  | 28.9 [28.3 - 29.5] |
| Davao            | Philippines | 2006 - 2010 | 3 - 6  | 14437  | 28.5 [27.9 - 29.0] |
| Manila           | Philippines | 2006 - 2010 | 3 - 6  | 30590  | 29.9 [29.0 - 30.8] |
| Quezon           | Philippines | 2006 - 2010 | 4 - 7  | 30436  | 29.1 [28.4 - 29.9] |
| Beja             | Portugal    | 1991 - 2016 | 6 - 9  | 18698  | 22.7 [20.5 - 25.2] |
| Coimbra          | Portugal    | 1991 - 2016 | 6 - 9  | 38217  | 19.5 [18.1 - 21.1] |
| Castelo Branco   | Portugal    | 1991 - 2016 | 6 - 9  | 22662  | 23.1 [20.2 - 26.1] |
| Lisboa           | Portugal    | 1991 - 2016 | 6 - 9  | 163329 | 21.7 [20.3 - 23.4] |



|                           |              |             |        |        |                    |
|---------------------------|--------------|-------------|--------|--------|--------------------|
| Porto                     | Portugal     | 1991 - 2016 | 6 - 9  | 108378 | 18.6 [17.4 - 20.1] |
| San Juan                  | Puertorico   | 2009 - 2016 | 6 - 9  | 8823   | 28.3 [27.5 - 28.9] |
| Bucharest                 | Romania      | 1994 - 2016 | 5 - 8  | 160073 | 21.2 [18.6 - 23.6] |
| Brasov                    | Romania      | 1994 - 2016 | 5 - 8  | 19082  | 17.7 [15.3 - 19.9] |
| Cluj-Napoca               | Romania      | 1994 - 2016 | 5 - 8  | 20764  | 18.5 [16.1 - 20.8] |
| Constanta                 | Romania      | 1994 - 2016 | 6 - 9  | 22735  | 22.5 [20.2 - 24.4] |
| Craiova                   | Romania      | 1994 - 2016 | 6 - 9  | 17734  | 21.6 [18.7 - 24.2] |
| Galati                    | Romania      | 1994 - 2016 | 5 - 8  | 18332  | 22.0 [19.2 - 24.6] |
| Iasi                      | Romania      | 1994 - 2016 | 5 - 8  | 19239  | 20.6 [17.9 - 23.2] |
| Timisoara                 | Romania      | 1994 - 2016 | 5 - 8  | 22072  | 20.9 [18.1 - 23.3] |
| Alfred Nzo                | South Africa | 1997 - 2013 | 12 - 3 | 37618  | 19.0 [16.7 - 21.3] |
| Amathole                  | South Africa | 1997 - 2013 | 12 - 3 | 77009  | 21.9 [19.8 - 23.9] |
| Buffalo City              | South Africa | 1997 - 2013 | 12 - 3 | 58760  | 14.9 [13.3 - 16.4] |
| Bojanala                  | South Africa | 1997 - 2013 | 11 - 2 | 68129  | 23.0 [21.6 - 24.1] |
| Cacadu                    | South Africa | 1997 - 2013 | 12 - 3 | 23419  | 22.8 [20.5 - 25.0] |
| Chris Hani                | South Africa | 1997 - 2013 | 12 - 3 | 45772  | 20.8 [18.8 - 22.7] |
| Central Karoo             | South Africa | 1997 - 2013 | 12 - 3 | 4406   | 23.3 [21.3 - 25.6] |
| City of Cape Town         | South Africa | 1997 - 2013 | 12 - 3 | 135535 | 21.9 [20.3 - 23.5] |
| Capricorn                 | South Africa | 1997 - 2013 | 12 - 3 | 65101  | 22.9 [21.5 - 24.2] |
| Cape Winelands            | South Africa | 1997 - 2013 | 12 - 3 | 31722  | 21.2 [18.8 - 23.5] |
| City of Johannesburg      | South Africa | 1997 - 2013 | 12 - 3 | 166244 | 19.9 [18.7 - 21.1] |
| City of Tshwane           | South Africa | 1997 - 2013 | 11 - 2 | 113550 | 20.9 [19.6 - 22.0] |
| Dr Kenneth Kaunda         | South Africa | 1997 - 2013 | 11 - 2 | 48687  | 23.2 [21.7 - 24.5] |
| Dr Ruth Segomotsi Mompoti | South Africa | 1997 - 2013 | 11 - 2 | 27465  | 25.6 [23.9 - 26.9] |
| Eden                      | South Africa | 1997 - 2013 | 12 - 3 | 25770  | 22.3 [20.2 - 24.4] |
| Ehlanzeni                 | South Africa | 1997 - 2013 | 12 - 3 | 83236  | 24.0 [22.6 - 25.2] |
| Ekurhuleni                | South Africa | 1997 - 2013 | 11 - 2 | 134880 | 20.2 [18.9 - 21.3] |
| eThekweni                 | South Africa | 1997 - 2013 | 12 - 3 | 188577 | 24.8 [23.6 - 26.0] |
| Frances Baard             | South Africa | 1997 - 2013 | 11 - 2 | 25641  | 24.5 [22.7 - 26.2] |
| Fezile Dabi               | South Africa | 1997 - 2013 | 11 - 2 | 33401  | 21.9 [20.4 - 23.1] |
| Gert Sibande              | South Africa | 1997 - 2013 | 12 - 3 | 63766  | 19.6 [18.0 - 20.9] |
| Greater Sekhukhune        | South Africa | 1997 - 2013 | 11 - 2 | 49965  | 24.9 [23.4 - 26.0] |
| Joe Gqabi                 | South Africa | 1997 - 2013 | 12 - 3 | 22997  | 21.2 [19.3 - 22.6] |
| Lejweleputswa             | South Africa | 1997 - 2013 | 11 - 2 | 55044  | 22.5 [20.8 - 24.0] |
| Mangaung                  | South Africa | 1997 - 2013 | 12 - 3 | 57255  | 22.2 [20.7 - 23.6] |
| Mopani                    | South Africa | 1997 - 2013 | 12 - 3 | 49301  | 25.6 [24.1 - 27.1] |
| Ngaka Modiri Molema       | South Africa | 1997 - 2013 | 11 - 2 | 49919  | 24.1 [22.7 - 25.5] |
| Nkangala                  | South Africa | 1997 - 2013 | 11 - 2 | 61254  | 20.5 [19.1 - 21.8] |
| Nelson Mandela Bay        | South Africa | 1997 - 2013 | 12 - 3 | 67588  | 21.1 [19.6 - 22.5] |
| Namakwa                   | South Africa | 1997 - 2013 | 12 - 3 | 5018   | 23.5 [20.6 - 26.3] |
| O.R.Tambo                 | South Africa | 1997 - 2013 | 12 - 3 | 64319  | 21.1 [18.9 - 23.2] |
| Overberg                  | South Africa | 1997 - 2013 | 12 - 3 | 9494   | 21.2 [19.5 - 23.1] |
| Pixley ka Seme            | South Africa | 1997 - 2013 | 12 - 3 | 13287  | 24.0 [22.1 - 25.7] |
| Sisonke                   | South Africa | 1997 - 2013 | 12 - 3 | 30003  | 18.0 [16.2 - 19.2] |
| Siyanda                   | South Africa | 1997 - 2013 | 12 - 3 | 15134  | 27.0 [25.1 - 28.7] |

|                    |              |             |        |        |                    |
|--------------------|--------------|-------------|--------|--------|--------------------|
| Thabo Mofutsanyane | South Africa | 1997 - 2013 | 12 - 3 | 62585  | 19.6 [18.3 - 20.8] |
| Ugu                | South Africa | 1997 - 2013 | 12 - 3 | 55168  | 23.9 [22.6 - 25.0] |
| uMgungundlovu      | South Africa | 1997 - 2013 | 12 - 3 | 73020  | 17.4 [15.2 - 19.2] |
| uMkhanyakude       | South Africa | 1997 - 2013 | 12 - 3 | 29772  | 25.6 [24.1 - 27.1] |
| uMzinyathi         | South Africa | 1997 - 2013 | 12 - 3 | 34448  | 19.8 [17.9 - 21.6] |
| uThukela           | South Africa | 1997 - 2013 | 11 - 2 | 45466  | 19.6 [18.0 - 20.8] |
| uThungulu          | South Africa | 1997 - 2013 | 12 - 3 | 59306  | 25.9 [24.1 - 27.8] |
| Vhembe             | South Africa | 1997 - 2013 | 11 - 2 | 43764  | 27.7 [26.0 - 29.4] |
| West Coast         | South Africa | 1997 - 2013 | 12 - 3 | 18117  | 24.2 [22.2 - 26.4] |
| Waterberg          | South Africa | 1997 - 2013 | 11 - 2 | 23497  | 26.0 [24.4 - 27.5] |
| A Coruna           | Spain        | 1991 - 2014 | 6 - 9  | 15857  | 18.9 [17.7 - 20.1] |
| Albacete           | Spain        | 1991 - 2014 | 6 - 9  | 7388   | 23.6 [20.9 - 25.8] |
| Alicante           | Spain        | 1991 - 2014 | 6 - 9  | 16928  | 25.1 [23.2 - 26.4] |
| Almeria            | Spain        | 1991 - 2014 | 6 - 9  | 9285   | 25.3 [23.3 - 27.0] |
| Avila              | Spain        | 1991 - 2014 | 6 - 9  | 3178   | 19.4 [16.5 - 21.8] |
| Badajoz            | Spain        | 1991 - 2014 | 6 - 9  | 7070   | 24.8 [22.5 - 26.9] |
| Bilbao             | Spain        | 1991 - 2014 | 6 - 9  | 25003  | 19.6 [17.8 - 21.6] |
| Barcelona          | Spain        | 1991 - 2014 | 6 - 9  | 114990 | 23.4 [21.3 - 25.1] |
| Burgos             | Spain        | 1991 - 2014 | 6 - 9  | 10542  | 18.2 [15.5 - 20.8] |
| Cadiz              | Spain        | 1991 - 2014 | 6 - 9  | 8819   | 23.5 [22.1 - 25.3] |
| Caceres            | Spain        | 1991 - 2014 | 6 - 9  | 4438   | 24.6 [21.8 - 27.2] |
| Ciudad Real        | Spain        | 1991 - 2014 | 6 - 9  | 3943   | 25.2 [22.2 - 27.5] |
| Ceuta              | Spain        | 1991 - 2014 | 6 - 9  | 3530   | 23.2 [21.9 - 24.5] |
| Cordoba            | Spain        | 1991 - 2014 | 6 - 9  | 17380  | 26.6 [24.3 - 28.6] |
| Castellon          | Spain        | 1991 - 2014 | 6 - 9  | 8591   | 24.8 [22.9 - 26.2] |
| Cuenca             | Spain        | 1991 - 2014 | 6 - 9  | 3295   | 22.2 [19.2 - 24.6] |
| Guadalajara        | Spain        | 1991 - 2014 | 6 - 9  | 3669   | 22.0 [19.3 - 24.2] |
| Girona             | Spain        | 1991 - 2014 | 6 - 9  | 4401   | 22.4 [20.0 - 24.3] |
| Granada            | Spain        | 1991 - 2014 | 6 - 9  | 14701  | 24.0 [21.6 - 26.0] |
| Huelva             | Spain        | 1991 - 2014 | 6 - 9  | 8022   | 24.5 [22.5 - 26.4] |
| Huesca             | Spain        | 1991 - 2014 | 6 - 9  | 3419   | 22.4 [19.6 - 25.1] |
| Jaen               | Spain        | 1991 - 2014 | 6 - 9  | 5918   | 25.6 [22.4 - 28.2] |
| Leon               | Spain        | 1991 - 2014 | 6 - 9  | 9187   | 18.3 [15.6 - 20.8] |
| Logrono            | Spain        | 1991 - 2014 | 6 - 9  | 7874   | 21.4 [18.9 - 24.0] |
| Lleida             | Spain        | 1991 - 2014 | 6 - 9  | 7369   | 23.8 [21.1 - 26.2] |
| Lugo               | Spain        | 1991 - 2014 | 6 - 9  | 5906   | 17.4 [15.4 - 19.5] |
| Malaga             | Spain        | 1991 - 2014 | 6 - 9  | 30994  | 24.8 [23.2 - 26.5] |
| Madrid             | Spain        | 1991 - 2014 | 6 - 9  | 187205 | 24.1 [21.0 - 26.6] |
| Melilla            | Spain        | 1991 - 2014 | 6 - 9  | 2997   | 24.5 [23.0 - 25.9] |
| Murcia             | Spain        | 1991 - 2014 | 6 - 9  | 18999  | 26.6 [24.3 - 28.0] |
| Ourense            | Spain        | 1991 - 2014 | 6 - 9  | 6988   | 21.5 [19.3 - 23.7] |
| Oviedo             | Spain        | 1991 - 2014 | 6 - 9  | 14425  | 18.2 [16.3 - 19.8] |
| Palmas G. Canaria  | Spain        | 1991 - 2014 | 7 - 10 | 20161  | 24.0 [23.2 - 24.8] |
| Palma Mallorca     | Spain        | 1991 - 2014 | 6 - 9  | 19972  | 24.0 [21.9 - 25.6] |
| Palencia           | Spain        | 1991 - 2014 | 6 - 9  | 5487   | 19.5 [17.0 - 22.1] |
| Pamplona           | Spain        | 1991 - 2014 | 6 - 9  | 11378  | 20.1 [17.5 - 22.9] |

|                |             |             |        |        |                    |
|----------------|-------------|-------------|--------|--------|--------------------|
| Pontevedra     | Spain       | 1991 - 2014 | 6 - 9  | 4359   | 19.3 [17.6 - 21.2] |
| Segovia        | Spain       | 1991 - 2014 | 6 - 9  | 3565   | 20.5 [17.4 - 23.3] |
| Salamanca      | Spain       | 1991 - 2014 | 6 - 9  | 10478  | 20.0 [17.5 - 22.3] |
| San Sebastian  | Spain       | 1991 - 2014 | 6 - 9  | 12261  | 18.3 [16.6 - 20.0] |
| Santander      | Spain       | 1991 - 2014 | 6 - 9  | 12616  | 19.3 [17.8 - 20.8] |
| Soria          | Spain       | 1991 - 2014 | 6 - 9  | 2309   | 19.0 [16.2 - 21.5] |
| Sevilla        | Spain       | 1991 - 2014 | 6 - 9  | 40431  | 27.0 [24.8 - 29.1] |
| Teruel         | Spain       | 1991 - 2014 | 6 - 9  | 2256   | 20.8 [18.1 - 23.2] |
| Tenerife       | Spain       | 1991 - 2014 | 7 - 10 | 11653  | 24.7 [23.7 - 25.7] |
| Toledo         | Spain       | 1991 - 2014 | 6 - 9  | 3799   | 25.2 [22.2 - 27.6] |
| Tarragona      | Spain       | 1991 - 2014 | 6 - 9  | 6541   | 25.5 [23.3 - 27.2] |
| Vitoria        | Spain       | 1991 - 2014 | 6 - 9  | 11521  | 17.8 [15.6 - 20.5] |
| Valladolid     | Spain       | 1991 - 2014 | 6 - 9  | 18292  | 20.8 [18.2 - 23.4] |
| Valencia       | Spain       | 1991 - 2014 | 6 - 9  | 49939  | 25.2 [23.2 - 26.5] |
| Zamora         | Spain       | 1991 - 2014 | 6 - 9  | 4359   | 21.1 [18.5 - 23.7] |
| Zaragoza       | Spain       | 1991 - 2014 | 6 - 9  | 40619  | 23.9 [21.2 - 26.6] |
| Basel          | Switzerland | 1995 - 2013 | 6 - 9  | 11742  | 18.1 [15.6 - 20.9] |
| Bern           | Switzerland | 1995 - 2013 | 6 - 9  | 8538   | 17.0 [14.5 - 19.7] |
| Geneve         | Switzerland | 1995 - 2013 | 6 - 9  | 8240   | 18.7 [16.1 - 21.3] |
| Lausanne       | Switzerland | 1995 - 2013 | 6 - 9  | 6488   | 18.8 [16.3 - 21.3] |
| Lugano         | Switzerland | 1995 - 2013 | 6 - 9  | 8670   | 20.9 [18.5 - 22.8] |
| Luzern         | Switzerland | 1995 - 2013 | 6 - 9  | 4612   | 17.6 [15.0 - 20.3] |
| St. Gallen     | Switzerland | 1995 - 2013 | 6 - 9  | 4084   | 15.7 [12.9 - 18.7] |
| Zürich         | Switzerland | 1995 - 2013 | 6 - 9  | 22648  | 17.0 [14.4 - 19.9] |
| Gothenburg     | Sweden      | 1991 - 2016 | 6 - 9  | 55289  | 16.2 [14.3 - 18.3] |
| Malmo          | Sweden      | 1991 - 2016 | 6 - 9  | 42724  | 16.3 [14.3 - 18.3] |
| Stockholm      | Sweden      | 1991 - 2016 | 6 - 9  | 117598 | 16.3 [13.8 - 18.7] |
| Amnat Charoen  | Thailand    | 1999 - 2008 | 3 - 6  | 3447   | 28.2 [27.5 - 28.9] |
| Ayutthaya      | Thailand    | 1999 - 2008 | 3 - 6  | 8173   | 29.9 [29.0 - 30.8] |
| Bangkok        | Thailand    | 1999 - 2008 | 3 - 6  | 81210  | 30.4 [29.6 - 31.3] |
| Buri Ram       | Thailand    | 1999 - 2008 | 3 - 6  | 10646  | 28.8 [27.9 - 29.8] |
| Chachoengsao   | Thailand    | 1999 - 2008 | 4 - 7  | 6948   | 28.3 [27.2 - 29.2] |
| Chumphon       | Thailand    | 1999 - 2008 | 3 - 6  | 4209   | 30.0 [29.0 - 30.9] |
| Chon Buri      | Thailand    | 1999 - 2008 | 4 - 7  | 16038  | 29.4 [28.6 - 30.0] |
| Chiang Mai     | Thailand    | 1999 - 2008 | 4 - 7  | 26170  | 28.3 [27.6 - 29.2] |
| Chiang Rai     | Thailand    | 1999 - 2008 | 4 - 7  | 18526  | 27.5 [26.5 - 28.2] |
| Chanthaburi    | Thailand    | 1999 - 2008 | 3 - 6  | 7443   | 28.4 [27.6 - 29.1] |
| Chaiyaphum     | Thailand    | 1999 - 2008 | 3 - 6  | 9470   | 29.5 [28.4 - 30.7] |
| Khon Kaen      | Thailand    | 1999 - 2008 | 3 - 6  | 20322  | 29.1 [27.9 - 30.3] |
| Kalasin        | Thailand    | 1999 - 2008 | 4 - 7  | 10235  | 29.5 [28.5 - 30.6] |
| Kamphaeng Phet | Thailand    | 1999 - 2008 | 4 - 7  | 4551   | 28.3 [27.2 - 29.5] |
| Kanchanaburi   | Thailand    | 1999 - 2008 | 3 - 6  | 7249   | 30.1 [29.2 - 30.9] |
| Krabi          | Thailand    | 1999 - 2008 | 3 - 6  | 2462   | 28.4 [27.5 - 29.2] |
| Lamphun        | Thailand    | 1999 - 2008 | 4 - 7  | 5544   | 27.9 [26.9 - 29.2] |
| Lampang        | Thailand    | 1999 - 2008 | 3 - 6  | 12937  | 29.4 [28.5 - 30.7] |
| Lop Buri       | Thailand    | 1999 - 2008 | 4 - 7  | 9947   | 28.2 [27.7 - 28.8] |

|                       |          |             |       |        |                    |
|-----------------------|----------|-------------|-------|--------|--------------------|
| Maha Sarakham         | Thailand | 1999 - 2008 | 3 - 6 | 8452   | 30.1 [29.1 - 30.9] |
| Mukdahan              | Thailand | 1999 - 2008 | 2 - 5 | 2496   | 28.7 [27.9 - 29.5] |
| Nan                   | Thailand | 1999 - 2008 | 4 - 7 | 6419   | 28.8 [27.9 - 29.8] |
| Nong Bua Lam Phu      | Thailand | 1999 - 2008 | 3 - 6 | 4236   | 29.9 [28.8 - 31.0] |
| Nakhon Ratchasima     | Thailand | 1999 - 2008 | 3 - 6 | 25182  | 28.8 [28.0 - 29.7] |
| Nakhon Sawan          | Thailand | 1999 - 2008 | 3 - 6 | 12885  | 30.1 [29.0 - 31.3] |
| Nakhon Phanom         | Thailand | 1999 - 2008 | 4 - 7 | 5367   | 28.7 [28.1 - 29.2] |
| Nakhon Pathom         | Thailand | 1999 - 2008 | 3 - 6 | 8492   | 29.7 [28.6 - 30.7] |
| Nakhon Si Thammarat   | Thailand | 1999 - 2008 | 4 - 7 | 13168  | 28.2 [27.6 - 28.7] |
| Nong Khai             | Thailand | 1999 - 2008 | 3 - 6 | 6945   | 29.6 [28.7 - 30.5] |
| Nonthaburi            | Thailand | 1999 - 2008 | 3 - 6 | 10489  | 29.5 [28.5 - 30.6] |
| Narathiwat            | Thailand | 1999 - 2008 | 3 - 6 | 5068   | 28.9 [28.0 - 29.8] |
| Phayao                | Thailand | 1999 - 2008 | 3 - 6 | 8185   | 29.2 [28.1 - 30.4] |
| Phetchaburi           | Thailand | 1999 - 2008 | 2 - 5 | 4743   | 28.7 [28.0 - 29.3] |
| Phichit               | Thailand | 1999 - 2008 | 3 - 6 | 5148   | 28.9 [28.1 - 29.7] |
| Phrae                 | Thailand | 1999 - 2008 | 3 - 6 | 7548   | 29.6 [28.7 - 30.5] |
| Phitsanulok           | Thailand | 1999 - 2008 | 3 - 6 | 10489  | 29.6 [28.8 - 30.5] |
| Prachin Buri          | Thailand | 1999 - 2008 | 2 - 5 | 4935   | 29.1 [28.4 - 29.8] |
| Prachuap Khiri Khan   | Thailand | 1999 - 2008 | 3 - 6 | 4906   | 28.8 [28.0 - 29.4] |
| Pathum Thani          | Thailand | 1999 - 2008 | 4 - 7 | 7398   | 28.9 [27.7 - 30.1] |
| Pattani               | Thailand | 1999 - 2008 | 2 - 5 | 4006   | 28.6 [27.8 - 29.3] |
| Roi Et                | Thailand | 1999 - 2008 | 4 - 7 | 13239  | 29.0 [28.0 - 30.1] |
| Ratchaburi            | Thailand | 1999 - 2008 | 3 - 6 | 9918   | 28.8 [27.8 - 30.0] |
| Rayong                | Thailand | 1999 - 2008 | 3 - 6 | 6189   | 27.6 [26.5 - 28.9] |
| Sa Kaeo               | Thailand | 1999 - 2008 | 4 - 7 | 4684   | 28.9 [28.1 - 29.6] |
| Sukhothai             | Thailand | 1999 - 2008 | 3 - 6 | 6057   | 29.9 [28.8 - 30.8] |
| Sakon Nakhon          | Thailand | 1999 - 2008 | 4 - 7 | 10656  | 28.5 [27.5 - 29.6] |
| Samutprakan           | Thailand | 1999 - 2008 | 4 - 7 | 10063  | 29.4 [28.5 - 30.0] |
| Samut Sakhon          | Thailand | 1999 - 2008 | 4 - 7 | 5206   | 29.4 [28.8 - 30.0] |
| Songkhla              | Thailand | 1999 - 2008 | 4 - 7 | 11435  | 28.8 [28.1 - 29.3] |
| Suphanburi            | Thailand | 1999 - 2008 | 3 - 6 | 8073   | 29.5 [28.6 - 30.4] |
| Saraburi              | Thailand | 1999 - 2008 | 3 - 6 | 7652   | 29.5 [28.6 - 30.7] |
| Surat Thani           | Thailand | 1999 - 2008 | 4 - 7 | 7687   | 29.2 [28.2 - 30.3] |
| Si Sa Ket             | Thailand | 1999 - 2008 | 3 - 6 | 12043  | 29.3 [28.2 - 30.4] |
| Surin                 | Thailand | 1999 - 2008 | 3 - 6 | 10238  | 29.4 [28.5 - 30.5] |
| Tak                   | Thailand | 1999 - 2008 | 4 - 7 | 3893   | 28.8 [28.1 - 29.4] |
| Trang                 | Thailand | 1999 - 2008 | 3 - 6 | 4495   | 29.9 [28.9 - 30.7] |
| Ubon Ratchathani      | Thailand | 1999 - 2008 | 3 - 6 | 16204  | 29.4 [28.1 - 30.6] |
| Udon Thani            | Thailand | 1999 - 2008 | 4 - 7 | 15321  | 29.2 [28.0 - 30.4] |
| Uttaradit             | Thailand | 1999 - 2008 | 3 - 6 | 6835   | 29.3 [28.0 - 30.9] |
| Yala                  | Thailand | 1999 - 2008 | 2 - 5 | 3575   | 28.2 [27.7 - 28.6] |
| Yasothon              | Thailand | 1999 - 2008 | 4 - 7 | 5233   | 28.2 [27.2 - 29.0] |
| Kaohsiung             | Taiwan   | 1994 - 2014 | 6 - 9 | 107675 | 28.9 [28.0 - 29.7] |
| Taipei                | Taiwan   | 1994 - 2014 | 6 - 9 | 196940 | 28.9 [27.5 - 30.0] |
| Taichung              | Taiwan   | 1994 - 2014 | 6 - 9 | 81002  | 28.4 [27.3 - 29.3] |
| Accrington/Rossendale | UK       | 1991 - 2016 | 6 - 9 | 4317   | 14.0 [12.4 - 15.6] |

|                        |    |             |       |        |                    |
|------------------------|----|-------------|-------|--------|--------------------|
| Bedford                | UK | 1991 - 2016 | 6 - 9 | 5694   | 16.1 [14.4 - 18.0] |
| Blackburn              | UK | 1991 - 2016 | 6 - 9 | 7900   | 14.6 [13.0 - 16.1] |
| Blackpool              | UK | 1991 - 2016 | 6 - 9 | 17655  | 15.2 [13.8 - 16.5] |
| Brighton and Hove      | UK | 1991 - 2016 | 6 - 9 | 32086  | 15.9 [14.4 - 17.4] |
| Barnsley/Dearne Valley | UK | 1991 - 2016 | 6 - 9 | 7569   | 15.3 [13.7 - 17.1] |
| Birkenhead             | UK | 1991 - 2016 | 6 - 9 | 21040  | 15.6 [14.2 - 17.1] |
| Burnley                | UK | 1991 - 2016 | 6 - 9 | 8551   | 14.2 [12.6 - 15.8] |
| Bournemouth/Poole      | UK | 1991 - 2016 | 6 - 9 | 32753  | 16.2 [14.6 - 17.7] |
| Bristol                | UK | 1991 - 2016 | 6 - 9 | 33133  | 16.1 [14.6 - 17.8] |
| Burton upon Trent      | UK | 1991 - 2016 | 6 - 9 | 4595   | 15.4 [13.7 - 17.2] |
| Basildon               | UK | 1991 - 2016 | 6 - 9 | 5795   | 16.4 [14.7 - 18.3] |
| Basingstoke            | UK | 1991 - 2016 | 6 - 9 | 4078   | 15.7 [14.0 - 17.5] |
| Chelmsford             | UK | 1991 - 2016 | 6 - 9 | 4474   | 16.3 [14.5 - 18.2] |
| Cheltenham             | UK | 1991 - 2016 | 6 - 9 | 7236   | 16.2 [14.6 - 18.0] |
| Chesterfield           | UK | 1991 - 2016 | 6 - 9 | 5441   | 15.2 [13.5 - 17.0] |
| Colchester             | UK | 1991 - 2016 | 6 - 9 | 5110   | 16.4 [14.6 - 18.3] |
| Cambridge              | UK | 1991 - 2016 | 6 - 9 | 5885   | 16.4 [14.7 - 18.4] |
| Cardiff                | UK | 1991 - 2016 | 6 - 9 | 21853  | 16.0 [14.6 - 17.7] |
| Crawley                | UK | 1991 - 2016 | 6 - 9 | 7052   | 16.0 [14.3 - 17.8] |
| Coventry               | UK | 1991 - 2016 | 6 - 9 | 19561  | 15.7 [14.0 - 17.6] |
| Doncaster              | UK | 1991 - 2016 | 6 - 9 | 7148   | 15.8 [14.2 - 17.7] |
| Derby                  | UK | 1991 - 2016 | 6 - 9 | 14051  | 15.7 [14.0 - 17.5] |
| Eastbourne             | UK | 1991 - 2016 | 6 - 9 | 6872   | 16.4 [14.9 - 17.8] |
| Exeter                 | UK | 1991 - 2016 | 6 - 9 | 5594   | 15.9 [14.4 - 17.3] |
| Farnborough/Aldershot  | UK | 1991 - 2016 | 6 - 9 | 9765   | 16.1 [14.3 - 17.9] |
| Gloucester             | UK | 1991 - 2016 | 6 - 9 | 7857   | 16.4 [14.8 - 18.1] |
| Grimsby                | UK | 1991 - 2016 | 6 - 9 | 7115   | 15.6 [14.0 - 17.5] |
| High Wycombe           | UK | 1991 - 2016 | 6 - 9 | 3724   | 15.9 [14.3 - 17.8] |
| Hastings               | UK | 1991 - 2016 | 6 - 9 | 10903  | 16.1 [14.5 - 17.5] |
| Ipswich                | UK | 1991 - 2016 | 6 - 9 | 9128   | 16.3 [14.5 - 18.2] |
| Kingston upon Hull     | UK | 1991 - 2016 | 6 - 9 | 19823  | 15.9 [14.2 - 17.8] |
| Leicester              | UK | 1991 - 2016 | 6 - 9 | 24706  | 15.4 [13.7 - 17.3] |
| Lincoln                | UK | 1991 - 2016 | 6 - 9 | 5348   | 15.4 [13.6 - 17.3] |
| London                 | UK | 1991 - 2016 | 6 - 9 | 470741 | 17.0 [15.2 - 18.8] |
| Luton                  | UK | 1991 - 2016 | 6 - 9 | 13417  | 15.8 [14.1 - 17.7] |
| Liverpool              | UK | 1991 - 2016 | 6 - 9 | 61988  | 15.7 [14.2 - 17.2] |
| Maidstone              | UK | 1991 - 2016 | 6 - 9 | 4736   | 16.2 [14.5 - 18.0] |
| Medway Towns           | UK | 1991 - 2016 | 6 - 9 | 12285  | 16.8 [15.1 - 18.6] |
| Milton Keynes          | UK | 1991 - 2016 | 6 - 9 | 6755   | 15.8 [14.1 - 17.7] |
| Manchester             | UK | 1991 - 2016 | 6 - 9 | 147300 | 15.2 [13.6 - 16.8] |
| Mansfield              | UK | 1991 - 2016 | 6 - 9 | 8050   | 15.1 [13.4 - 17.0] |
| Northampton            | UK | 1991 - 2016 | 6 - 9 | 11117  | 15.8 [14.1 - 17.7] |
| Norwich                | UK | 1991 - 2016 | 6 - 9 | 10696  | 15.7 [13.9 - 17.8] |
| Nottingham             | UK | 1991 - 2016 | 6 - 9 | 39242  | 15.7 [14.1 - 17.6] |
| Newport                | UK | 1991 - 2016 | 6 - 9 | 11891  | 15.6 [14.1 - 17.2] |
| Oxford                 | UK | 1991 - 2016 | 6 - 9 | 5537   | 16.4 [14.6 - 18.2] |

|                  |         |             |        |        |                    |
|------------------|---------|-------------|--------|--------|--------------------|
| Paignton/Torquay | UK      | 1991 - 2016 | 6 - 9  | 8887   | 16.0 [14.7 - 17.4] |
| Plymouth         | UK      | 1991 - 2016 | 6 - 9  | 14724  | 15.7 [14.2 - 17.0] |
| Preston          | UK      | 1991 - 2016 | 6 - 9  | 13016  | 15.1 [13.6 - 16.7] |
| Peterborough     | UK      | 1991 - 2016 | 6 - 9  | 8118   | 16.1 [14.4 - 18.1] |
| Reading          | UK      | 1991 - 2016 | 6 - 9  | 12455  | 16.3 [14.6 - 18.2] |
| Sheffield        | UK      | 1991 - 2016 | 6 - 9  | 37088  | 15.3 [13.6 - 17.1] |
| Slough           | UK      | 1991 - 2016 | 6 - 9  | 6370   | 16.6 [14.9 - 18.5] |
| Sunderland       | UK      | 1991 - 2016 | 6 - 9  | 18216  | 14.6 [13.1 - 16.3] |
| South Hampshire  | UK      | 1991 - 2016 | 6 - 9  | 42564  | 16.7 [15.2 - 18.3] |
| Southend-on-Sea  | UK      | 1991 - 2016 | 6 - 9  | 18841  | 17.1 [15.3 - 18.8] |
| Stoke-on-Trent   | UK      | 1991 - 2016 | 6 - 9  | 20589  | 14.6 [13.0 - 16.3] |
| Swindon          | UK      | 1991 - 2016 | 6 - 9  | 8833   | 15.8 [14.1 - 17.5] |
| Swansea          | UK      | 1991 - 2016 | 6 - 9  | 12810  | 16.0 [14.6 - 17.4] |
| Thanet           | UK      | 1991 - 2016 | 6 - 9  | 7504   | 16.8 [15.0 - 18.5] |
| Telford          | UK      | 1991 - 2016 | 6 - 9  | 4683   | 15.1 [13.4 - 16.8] |
| Teesside         | UK      | 1991 - 2016 | 6 - 9  | 22824  | 14.9 [13.4 - 16.8] |
| Tyneside         | UK      | 1991 - 2016 | 6 - 9  | 50842  | 14.7 [13.1 - 16.4] |
| Wigan            | UK      | 1991 - 2016 | 6 - 9  | 7704   | 15.2 [13.6 - 16.7] |
| Worcester        | UK      | 1991 - 2016 | 6 - 9  | 4547   | 16.2 [14.5 - 18.0] |
| Warrington       | UK      | 1991 - 2016 | 6 - 9  | 8337   | 15.7 [14.1 - 17.3] |
| West Midlands    | UK      | 1991 - 2016 | 6 - 9  | 157450 | 15.5 [13.8 - 17.3] |
| West Yorkshire   | UK      | 1991 - 2016 | 6 - 9  | 90319  | 15.1 [13.4 - 16.7] |
| York             | UK      | 1991 - 2016 | 6 - 9  | 7317   | 15.6 [13.9 - 17.4] |
| Montevideo       | Uruguay | 2012 - 2016 | 12 - 3 | 45487  | 24.3 [21.6 - 26.3] |
| Augusta          | USA     | 1991 - 2006 | 6 - 9  | 8520   | 25.6 [24.2 - 27.3] |
| Akron            | USA     | 1991 - 2006 | 6 - 9  | 24362  | 20.8 [18.2 - 23.1] |
| Albany           | USA     | 1991 - 2006 | 6 - 9  | 13125  | 20.4 [17.7 - 22.8] |
| Albuquerque      | USA     | 1991 - 2006 | 6 - 9  | 17150  | 24.1 [21.7 - 26.2] |
| Allentown        | USA     | 1991 - 2006 | 6 - 9  | 13876  | 21.8 [19.1 - 24.0] |
| Anchorage        | USA     | 1991 - 2006 | 5 - 8  | 4393   | 14.1 [11.8 - 16.1] |
| Anaheim          | USA     | 1991 - 2006 | 6 - 9  | 74617  | 22.5 [20.8 - 24.4] |
| AnnArbor         | USA     | 1991 - 2006 | 6 - 9  | 7912   | 20.6 [17.9 - 23.1] |
| Annandale        | USA     | 1991 - 2006 | 6 - 9  | 17480  | 24.4 [21.8 - 26.4] |
| Austin           | USA     | 1991 - 2006 | 6 - 9  | 16947  | 28.2 [26.3 - 29.6] |
| Atlantic City    | USA     | 1991 - 2006 | 6 - 9  | 11226  | 22.4 [19.8 - 24.6] |
| Atlanta          | USA     | 1991 - 2006 | 6 - 9  | 73589  | 24.7 [23.1 - 26.3] |
| Atzec            | USA     | 1991 - 2006 | 6 - 9  | 1604   | 22.6 [19.7 - 24.6] |
| Bath             | USA     | 1991 - 2006 | 6 - 9  | 2579   | 20.0 [17.3 - 22.2] |
| Buffalo          | USA     | 1991 - 2006 | 6 - 9  | 47329  | 20.1 [17.5 - 22.4] |
| Bakersfield      | USA     | 1991 - 2006 | 6 - 9  | 21287  | 27.1 [24.6 - 29.5] |
| Boulder          | USA     | 1991 - 2006 | 6 - 9  | 5955   | 22.7 [19.3 - 25.7] |
| Baltimore        | USA     | 1991 - 2006 | 6 - 9  | 71940  | 24.1 [21.7 - 26.2] |
| Bangor           | USA     | 1991 - 2006 | 6 - 9  | 5982   | 18.7 [16.1 - 20.9] |
| Boise            | USA     | 1991 - 2006 | 6 - 9  | 4362   | 21.7 [17.7 - 25.1] |
| bergen           | USA     | 1991 - 2006 | 6 - 9  | 52236  | 22.7 [19.8 - 25.2] |
| Burlington       | USA     | 1991 - 2006 | 6 - 9  | 4062   | 19.7 [17.0 - 22.3] |

|                  |     |             |       |        |                    |
|------------------|-----|-------------|-------|--------|--------------------|
| Birmingham       | USA | 1991 - 2006 | 6 - 9 | 38487  | 25.6 [23.9 - 27.1] |
| Barnstable       | USA | 1991 - 2006 | 6 - 9 | 12274  | 20.2 [17.9 - 22.4] |
| Brownsville      | USA | 1991 - 2006 | 6 - 9 | 8455   | 28.7 [27.7 - 29.4] |
| Boston           | USA | 1991 - 2006 | 6 - 9 | 103958 | 20.9 [18.2 - 23.5] |
| Baton Rouge      | USA | 1991 - 2006 | 6 - 9 | 14810  | 26.6 [25.3 - 27.9] |
| Cedar Rapids     | USA | 1991 - 2006 | 6 - 9 | 6422   | 21.2 [18.3 - 23.6] |
| Chicago          | USA | 1991 - 2006 | 6 - 9 | 251668 | 22.7 [19.6 - 25.1] |
| Charlotte        | USA | 1991 - 2006 | 6 - 9 | 19452  | 24.6 [22.7 - 26.2] |
| Charleston SC    | USA | 1991 - 2006 | 6 - 9 | 11715  | 26.1 [24.7 - 27.5] |
| Chattanooga      | USA | 1991 - 2006 | 6 - 9 | 14169  | 24.9 [22.9 - 26.5] |
| Charleston WV    | USA | 1991 - 2006 | 6 - 9 | 11311  | 22.2 [19.8 - 24.2] |
| Columbus         | USA | 1991 - 2006 | 6 - 9 | 37149  | 22.5 [19.9 - 24.7] |
| Colorado Springs | USA | 1991 - 2006 | 6 - 9 | 12338  | 19.4 [16.6 - 21.9] |
| Cleveland        | USA | 1991 - 2006 | 6 - 9 | 91317  | 22.1 [19.7 - 24.5] |
| Cincinnati       | USA | 1991 - 2006 | 6 - 9 | 38280  | 22.8 [20.3 - 24.8] |
| Canton           | USA | 1991 - 2006 | 6 - 9 | 17561  | 20.7 [18.0 - 23.0] |
| Columbia         | USA | 1991 - 2006 | 6 - 9 | 18031  | 25.8 [24.3 - 27.5] |
| Carlisle         | USA | 1991 - 2006 | 6 - 9 | 8818   | 23.4 [20.5 - 25.7] |
| Corpus Christ    | USA | 1991 - 2006 | 6 - 9 | 11006  | 28.3 [27.2 - 29.1] |
| Davis            | USA | 1991 - 2006 | 6 - 9 | 4445   | 22.6 [18.5 - 24.9] |
| Dallas           | USA | 1991 - 2006 | 6 - 9 | 61401  | 28.9 [26.5 - 30.9] |
| Denver           | USA | 1991 - 2006 | 6 - 9 | 42836  | 20.9 [17.9 - 23.4] |
| Dodge            | USA | 1991 - 2006 | 6 - 9 | 2143   | 20.1 [17.2 - 22.7] |
| Dover            | USA | 1991 - 2006 | 6 - 9 | 4643   | 22.9 [20.6 - 25.0] |
| Durham           | USA | 1991 - 2006 | 6 - 9 | 7505   | 24.4 [22.3 - 26.2] |
| Des Moines       | USA | 1991 - 2006 | 6 - 9 | 12537  | 22.4 [19.5 - 24.8] |
| Detroit          | USA | 1991 - 2006 | 6 - 9 | 166450 | 21.9 [19.1 - 24.3] |
| Davenport        | USA | 1991 - 2006 | 6 - 9 | 12341  | 21.5 [18.6 - 24.1] |
| Daytona Beach    | USA | 1991 - 2006 | 6 - 9 | 25829  | 26.5 [25.6 - 27.3] |
| Dayton           | USA | 1991 - 2006 | 6 - 9 | 24777  | 22.0 [19.3 - 24.2] |
| El Centro        | USA | 1991 - 2006 | 6 - 9 | 3786   | 32.5 [30.4 - 34.2] |
| Elkhart          | USA | 1991 - 2006 | 6 - 9 | 6248   | 23.0 [19.9 - 25.6] |
| El Paso          | USA | 1991 - 2006 | 5 - 8 | 17654  | 27.5 [25.2 - 29.5] |
| Elizabeth        | USA | 1991 - 2006 | 6 - 9 | 21154  | 23.6 [21.0 - 25.7] |
| Erie             | USA | 1991 - 2006 | 6 - 9 | 12368  | 20.7 [18.2 - 23.1] |
| Essex            | USA | 1991 - 2006 | 6 - 9 | 29264  | 20.2 [17.6 - 23.0] |
| Eugene           | USA | 1991 - 2006 | 6 - 9 | 12540  | 17.7 [15.7 - 19.9] |
| Evansville       | USA | 1991 - 2006 | 6 - 9 | 8300   | 24.1 [21.6 - 26.2] |
| Everett          | USA | 1991 - 2006 | 6 - 9 | 16792  | 16.7 [14.7 - 19.1] |
| Fargo            | USA | 1991 - 2006 | 6 - 9 | 3336   | 19.7 [16.4 - 22.4] |
| Flint            | USA | 1991 - 2006 | 6 - 9 | 17699  | 20.1 [17.3 - 22.5] |
| Fresno           | USA | 1991 - 2006 | 6 - 9 | 24309  | 26.4 [23.9 - 28.8] |
| Fort Lauderdale  | USA | 1991 - 2006 | 6 - 9 | 73356  | 28.5 [27.6 - 29.3] |
| Fort Myers       | USA | 1991 - 2006 | 6 - 9 | 21571  | 27.3 [26.3 - 28.2] |
| Fort Pierce      | USA | 1991 - 2006 | 6 - 9 | 16391  | 26.9 [25.9 - 27.8] |
| Fort Worth       | USA | 1991 - 2006 | 6 - 9 | 41101  | 28.2 [25.8 - 30.3] |

|                |     |             |        |        |                    |
|----------------|-----|-------------|--------|--------|--------------------|
| Fort Wayne     | USA | 1991 - 2006 | 6 - 9  | 11587  | 21.2 [18.6 - 23.6] |
| Fayetteville   | USA | 1991 - 2006 | 6 - 9  | 8339   | 25.6 [23.6 - 27.4] |
| Gary           | USA | 1991 - 2006 | 6 - 9  | 20739  | 22.9 [19.8 - 25.4] |
| Green bay      | USA | 1991 - 2006 | 6 - 9  | 6916   | 19.3 [16.4 - 21.8] |
| Greensburg     | USA | 1991 - 2006 | 6 - 9  | 19728  | 23.0 [20.1 - 25.1] |
| Grand Heaven   | USA | 1991 - 2006 | 6 - 9  | 6429   | 19.9 [17.2 - 22.3] |
| Grand Junction | USA | 1991 - 2006 | 6 - 9  | 2780   | 23.7 [20.4 - 26.3] |
| Grand Rapids   | USA | 1991 - 2006 | 6 - 9  | 18244  | 20.3 [17.4 - 22.7] |
| Greensburg     | USA | 1991 - 2006 | 6 - 9  | 15243  | 23.8 [21.7 - 25.6] |
| Greenv         | USA | 1991 - 2006 | 6 - 9  | 13757  | 25.3 [23.2 - 27.3] |
| Gasinesville   | USA | 1991 - 2006 | 6 - 9  | 6620   | 25.9 [24.9 - 26.9] |
| Gettysburg     | USA | 1991 - 2006 | 6 - 9  | 2082   | 22.6 [19.6 - 25.3] |
| Hicory         | USA | 1991 - 2006 | 6 - 9  | 5435   | 23.7 [21.7 - 25.3] |
| Holland        | USA | 1991 - 2006 | 6 - 9  | 2025   | 20.1 [17.3 - 22.6] |
| honolulu       | USA | 1991 - 2006 | 7 - 10 | 16299  | 26.9 [26.3 - 27.6] |
| Harrisburg     | USA | 1991 - 2006 | 6 - 9  | 11375  | 23.4 [20.5 - 25.7] |
| Hartford       | USA | 1991 - 2006 | 6 - 9  | 35697  | 21.9 [19.2 - 24.2] |
| Houston        | USA | 1991 - 2006 | 6 - 9  | 88298  | 27.9 [26.7 - 28.8] |
| Indianapolis   | USA | 1991 - 2006 | 6 - 9  | 34537  | 22.8 [20.2 - 24.7] |
| iowa city      | USA | 1991 - 2006 | 6 - 9  | 1301   | 21.9 [18.8 - 24.3] |
| Jacksonville   | USA | 1991 - 2006 | 6 - 9  | 29462  | 27.3 [26.2 - 28.4] |
| Jersy city     | USA | 1991 - 2006 | 6 - 9  | 21935  | 19.8 [17.5 - 21.9] |
| Klamath        | USA | 1991 - 2006 | 6 - 9  | 1734   | 17.4 [14.2 - 20.1] |
| Kalamazoo      | USA | 1991 - 2006 | 6 - 9  | 8217   | 21.5 [18.6 - 24.0] |
| Kenosha        | USA | 1991 - 2006 | 6 - 9  | 5289   | 20.4 [17.4 - 23.0] |
| Kansas         | USA | 1991 - 2006 | 6 - 9  | 50468  | 24.9 [22.1 - 27.6] |
| Knoxville      | USA | 1991 - 2006 | 6 - 9  | 18138  | 24.1 [22.2 - 25.7] |
| Lafayette IN   | USA | 1991 - 2006 | 6 - 9  | 4482   | 22.3 [19.4 - 24.5] |
| Lafayette LA   | USA | 1991 - 2006 | 6 - 9  | 5993   | 26.9 [25.7 - 28.2] |
| Lake Charles   | USA | 1991 - 2006 | 6 - 9  | 7423   | 28.5 [26.8 - 30.1] |
| Lakeland       | USA | 1991 - 2006 | 6 - 9  | 22689  | 28.0 [26.9 - 29.0] |
| Lancaster      | USA | 1991 - 2006 | 6 - 9  | 18565  | 22.7 [20.0 - 24.9] |
| Lansing        | USA | 1991 - 2006 | 6 - 9  | 8568   | 19.9 [16.9 - 22.4] |
| Logan          | USA | 1991 - 2006 | 6 - 9  | 962    | 20.1 [16.7 - 22.9] |
| Louisville     | USA | 1991 - 2006 | 6 - 9  | 31310  | 24.7 [22.3 - 26.7] |
| La Porte       | USA | 1991 - 2006 | 6 - 9  | 4716   | 21.1 [18.2 - 23.6] |
| Los Angeles    | USA | 1991 - 2006 | 6 - 9  | 275046 | 20.7 [19.1 - 22.3] |
| Las Vegas      | USA | 1991 - 2006 | 6 - 9  | 47174  | 31.8 [29.1 - 33.9] |
| Little Rock    | USA | 1991 - 2006 | 6 - 9  | 14885  | 26.3 [24.1 - 28.3] |
| Macon          | USA | 1991 - 2006 | 6 - 9  | 7594   | 25.7 [24.2 - 27.1] |
| Mcallen        | USA | 1991 - 2006 | 6 - 9  | 11946  | 29.4 [28.2 - 30.4] |
| Middles        | USA | 1991 - 2006 | 6 - 9  | 25024  | 22.9 [20.1 - 25.4] |
| Middletown     | USA | 1991 - 2006 | 6 - 9  | 11749  | 22.4 [20.0 - 24.6] |
| Medford        | USA | 1991 - 2006 | 6 - 9  | 8148   | 21.1 [18.2 - 24.0] |
| Madison IL     | USA | 1991 - 2006 | 6 - 9  | 10953  | 24.8 [21.9 - 27.3] |
| Modesto        | USA | 1991 - 2006 | 6 - 9  | 14941  | 25.7 [22.9 - 28.3] |



|              |     |             |       |        |                    |
|--------------|-----|-------------|-------|--------|--------------------|
| Madison WI   | USA | 1991 - 2006 | 6 - 9 | 11424  | 20.4 [17.3 - 23.0] |
| Miami        | USA | 1991 - 2006 | 6 - 9 | 88324  | 28.3 [27.3 - 29.1] |
| Melbourn     | USA | 1991 - 2006 | 6 - 9 | 22127  | 27.0 [26.1 - 27.9] |
| Milwaukee    | USA | 1991 - 2006 | 6 - 9 | 52205  | 20.8 [17.6 - 23.4] |
| Memphis      | USA | 1991 - 2006 | 6 - 9 | 35089  | 26.6 [24.5 - 28.5] |
| Monmouth     | USA | 1991 - 2006 | 6 - 9 | 54759  | 23.5 [20.4 - 26.3] |
| Minneapolis  | USA | 1991 - 2006 | 6 - 9 | 54080  | 21.1 [18.0 - 23.4] |
| Montgomery   | USA | 1991 - 2006 | 6 - 9 | 9375   | 27.7 [26.1 - 29.3] |
| Mobile       | USA | 1991 - 2006 | 6 - 9 | 17079  | 27.1 [25.8 - 28.3] |
| Monroe       | USA | 1991 - 2006 | 6 - 9 | 6043   | 26.7 [24.9 - 28.2] |
| Mercer       | USA | 1991 - 2006 | 6 - 9 | 6415   | 19.3 [16.6 - 21.7] |
| Marlboro     | USA | 1991 - 2006 | 6 - 9 | 19121  | 23.3 [20.8 - 25.5] |
| Muskegon     | USA | 1991 - 2006 | 6 - 9 | 7165   | 19.9 [17.2 - 22.3] |
| Muncie       | USA | 1991 - 2006 | 6 - 9 | 5331   | 22.3 [19.6 - 24.8] |
| Myrtle Beach | USA | 1991 - 2006 | 6 - 9 | 7844   | 25.6 [24.1 - 26.9] |
| Nashua       | USA | 1991 - 2006 | 6 - 9 | 11618  | 22.4 [19.3 - 25.3] |
| Nassau       | USA | 1991 - 2006 | 6 - 9 | 104321 | 22.6 [20.1 - 24.4] |
| Niles        | USA | 1991 - 2006 | 6 - 9 | 6944   | 21.1 [18.2 - 23.6] |
| Norfolk      | USA | 1991 - 2006 | 6 - 9 | 43738  | 24.8 [22.9 - 26.6] |
| Nashville    | USA | 1991 - 2006 | 6 - 9 | 22369  | 25.0 [23.0 - 26.8] |
| Newburgh     | USA | 1991 - 2006 | 6 - 9 | 11402  | 21.1 [18.3 - 23.4] |
| Newhaven     | USA | 1991 - 2006 | 6 - 9 | 35123  | 22.1 [19.6 - 24.2] |
| Newlond      | USA | 1991 - 2006 | 6 - 9 | 9196   | 20.5 [18.4 - 22.4] |
| NewOrleans   | USA | 1991 - 2006 | 6 - 9 | 41329  | 28.6 [27.3 - 29.6] |
| Newark       | USA | 1991 - 2006 | 6 - 9 | 48816  | 23.6 [21.0 - 25.7] |
| New York     | USA | 1991 - 2006 | 6 - 9 | 294415 | 19.8 [17.4 - 21.9] |
| Ocala        | USA | 1991 - 2006 | 6 - 9 | 14547  | 25.9 [24.9 - 26.9] |
| Oklahoma     | USA | 1991 - 2006 | 6 - 9 | 27906  | 26.3 [23.3 - 28.8] |
| Oakland      | USA | 1991 - 2006 | 6 - 9 | 74071  | 16.6 [15.6 - 17.9] |
| Omaha        | USA | 1991 - 2006 | 6 - 9 | 16132  | 22.7 [19.7 - 25.3] |
| Orlando      | USA | 1991 - 2006 | 6 - 9 | 38319  | 27.1 [26.1 - 28.1] |
| Ottawa       | USA | 1991 - 2006 | 6 - 9 | 5564   | 21.6 [18.5 - 24.2] |
| Philadelphia | USA | 1991 - 2006 | 6 - 9 | 202375 | 23.2 [20.5 - 25.5] |
| Phoenix      | USA | 1991 - 2006 | 6 - 9 | 93475  | 33.7 [31.5 - 35.6] |
| Palmbeach    | USA | 1991 - 2006 | 6 - 9 | 57008  | 27.7 [26.7 - 28.5] |
| Plymouth     | USA | 1991 - 2006 | 6 - 9 | 17676  | 20.1 [17.3 - 22.7] |
| Pensacola    | USA | 1991 - 2006 | 6 - 9 | 12556  | 27.1 [25.9 - 28.2] |
| Portland OR  | USA | 1991 - 2006 | 6 - 9 | 49341  | 18.8 [16.7 - 21.0] |
| Provo        | USA | 1991 - 2006 | 6 - 9 | 6553   | 21.7 [18.0 - 24.1] |
| Port Arthur  | USA | 1991 - 2006 | 6 - 9 | 11861  | 27.5 [26.3 - 28.3] |
| Portage      | USA | 1991 - 2006 | 6 - 9 | 4807   | 22.9 [19.8 - 25.4] |
| Portlme      | USA | 1991 - 2006 | 6 - 9 | 10442  | 18.8 [16.4 - 21.1] |
| Providence   | USA | 1991 - 2006 | 6 - 9 | 56690  | 21.1 [18.6 - 23.3] |
| Pittsburg    | USA | 1991 - 2006 | 6 - 9 | 69903  | 21.6 [18.9 - 23.7] |
| Richmond     | USA | 1991 - 2006 | 6 - 9 | 26848  | 24.1 [21.9 - 26.2] |
| Rochester    | USA | 1991 - 2006 | 6 - 9 | 29348  | 20.0 [17.3 - 22.3] |

|                |     |             |        |        |                    |
|----------------|-----|-------------|--------|--------|--------------------|
| Rockville      | USA | 1991 - 2006 | 6 - 9  | 21511  | 24.5 [22.1 - 26.6] |
| Reading        | USA | 1991 - 2006 | 6 - 9  | 16274  | 22.6 [19.8 - 25.0] |
| Reno           | USA | 1991 - 2006 | 6 - 9  | 11090  | 21.9 [18.9 - 24.4] |
| Raleigh        | USA | 1991 - 2006 | 6 - 9  | 14131  | 24.5 [22.3 - 26.2] |
| Riverside      | USA | 1991 - 2006 | 6 - 9  | 105000 | 23.4 [21.1 - 26.0] |
| Sacramento     | USA | 1991 - 2006 | 6 - 9  | 40822  | 22.1 [19.9 - 24.4] |
| Scranton       | USA | 1991 - 2006 | 6 - 9  | 33425  | 20.4 [17.8 - 22.8] |
| San Diego      | USA | 1991 - 2006 | 7 - 10 | 88688  | 20.7 [19.3 - 22.5] |
| San Francisco  | USA | 1991 - 2006 | 7 - 10 | 54781  | 16.6 [15.5 - 18.1] |
| Salt Lake      | USA | 1991 - 2006 | 6 - 9  | 21309  | 23.9 [19.7 - 26.6] |
| San Jose       | USA | 1991 - 2006 | 6 - 9  | 40235  | 21.9 [20.2 - 24.1] |
| Santa Barbara  | USA | 1991 - 2006 | 6 - 9  | 13176  | 18.0 [16.9 - 19.2] |
| San Antonio    | USA | 1991 - 2006 | 6 - 9  | 44330  | 28.8 [27.2 - 30.2] |
| Spokane        | USA | 1991 - 2006 | 6 - 9  | 16021  | 19.0 [15.7 - 22.2] |
| Springfield MA | USA | 1991 - 2006 | 6 - 9  | 21071  | 21.2 [18.4 - 23.6] |
| Springfield MO | USA | 1991 - 2006 | 6 - 9  | 10185  | 23.9 [21.2 - 26.1] |
| Spartanburg    | USA | 1991 - 2006 | 6 - 9  | 10875  | 24.2 [22.4 - 25.9] |
| Sarasota       | USA | 1991 - 2006 | 6 - 9  | 35278  | 27.7 [26.6 - 28.8] |
| Steubenville   | USA | 1991 - 2006 | 6 - 9  | 3882   | 21.7 [19.1 - 24.1] |
| Saint Charles  | USA | 1991 - 2006 | 6 - 9  | 7107   | 24.9 [22.2 - 27.3] |
| Stockton       | USA | 1991 - 2006 | 6 - 9  | 19046  | 23.4 [21.1 - 25.8] |
| Saint Clair    | USA | 1991 - 2006 | 6 - 9  | 10879  | 24.8 [21.9 - 27.3] |
| South bend     | USA | 1991 - 2006 | 6 - 9  | 10996  | 21.1 [18.2 - 23.6] |
| St Louis       | USA | 1991 - 2006 | 6 - 9  | 70190  | 24.8 [21.9 - 27.3] |
| Stamford       | USA | 1991 - 2006 | 6 - 9  | 31606  | 21.2 [18.6 - 23.4] |
| St. Petersburg | USA | 1991 - 2006 | 6 - 9  | 38081  | 28.6 [27.6 - 29.6] |
| State College  | USA | 1991 - 2006 | 6 - 9  | 3698   | 20.7 [18.2 - 22.9] |
| Seattle        | USA | 1991 - 2006 | 6 - 9  | 51974  | 15.1 [14.0 - 16.2] |
| Sioux City     | USA | 1991 - 2006 | 6 - 9  | 2386   | 21.8 [18.6 - 24.3] |
| Tacoma         | USA | 1991 - 2006 | 6 - 9  | 22649  | 17.4 [15.5 - 19.5] |
| Tampa          | USA | 1991 - 2006 | 6 - 9  | 38081  | 27.4 [26.6 - 28.3] |
| Tucson         | USA | 1991 - 2006 | 6 - 9  | 30943  | 29.6 [27.6 - 31.6] |
| Tallahassee    | USA | 1991 - 2006 | 6 - 9  | 6363   | 26.3 [25.3 - 27.4] |
| Toledo         | USA | 1991 - 2006 | 6 - 9  | 20727  | 21.2 [18.5 - 23.6] |
| Topeka         | USA | 1991 - 2006 | 6 - 9  | 7419   | 24.1 [21.1 - 26.8] |
| Trenton        | USA | 1991 - 2006 | 6 - 9  | 12877  | 22.9 [20.2 - 25.1] |
| Terra Haute    | USA | 1991 - 2006 | 6 - 9  | 5316   | 22.6 [19.8 - 24.8] |
| Tulsa          | USA | 1991 - 2006 | 6 - 9  | 22588  | 26.4 [23.6 - 29.1] |
| Visalia        | USA | 1991 - 2006 | 6 - 9  | 11854  | 24.7 [22.6 - 26.8] |
| Vancouver      | USA | 1991 - 2006 | 6 - 9  | 9533   | 18.6 [16.6 - 20.8] |
| Ventura        | USA | 1991 - 2006 | 6 - 9  | 20645  | 18.8 [17.4 - 20.1] |
| Wichita        | USA | 1991 - 2006 | 6 - 9  | 16053  | 25.2 [22.1 - 27.8] |
| Weber          | USA | 1991 - 2006 | 6 - 9  | 5805   | 23.9 [19.9 - 26.6] |
| Wilmington     | USA | 1991 - 2006 | 6 - 9  | 17491  | 23.2 [20.6 - 25.1] |
| Winston        | USA | 1991 - 2006 | 6 - 9  | 12024  | 24.6 [22.2 - 26.5] |
| Worcester      | USA | 1991 - 2006 | 6 - 9  | 30362  | 19.3 [16.6 - 21.7] |

|                  |         |             |       |       |                    |
|------------------|---------|-------------|-------|-------|--------------------|
| WDC              | USA     | 1991 - 2006 | 6 - 9 | 30295 | 24.5 [22.1 - 26.6] |
| Washington       | USA     | 1991 - 2006 | 6 - 9 | 10971 | 20.3 [17.3 - 22.6] |
| Youngstown       | USA     | 1991 - 2006 | 6 - 9 | 19480 | 20.1 [17.2 - 22.4] |
| York             | USA     | 1991 - 2006 | 6 - 9 | 14433 | 22.3 [19.3 - 24.6] |
| Ho Chi Minh City | Vietnam | 2010 - 2013 | 3 - 6 | 35600 | 29.5 [28.7 - 30.3] |
| Hue              | Vietnam | 2009 - 2013 | 5 - 8 | 2077  | 29.5 [28.3 - 30.6] |

**Supplementary Table 3.** Information about the climate data simulations used in both scenarios.

| <b>Model</b>    | <b>Member</b> | <b>Reference</b>                                                                                                                                                                                              |
|-----------------|---------------|---------------------------------------------------------------------------------------------------------------------------------------------------------------------------------------------------------------|
| ACCESS-ESM1-5   | r1i1p1f1      | Ziehn, T. et al. The Australian Earth System Model: ACCESS-ESM1.5. J. South. Hemisph. Earth Syst. Sci. (2020) doi:10.1071/es19035.                                                                            |
| CanESM5         | r1i1p1f1      | Swart, N. C. et al. The Canadian Earth System Model version 5 (CanESM5.0.3). Geosci. Model Dev. Discuss. (2019) doi:10.5194/gmd-2019-177                                                                      |
| CNRM-CM6-1      | r1i1p1f1      | Voltaire, A. et al. Evaluation of CMIP6 DECK Experiments With CNRM-CM6-1. J. Adv. Model. Earth Syst. (2019) doi:10.1029/2019MS001683.                                                                         |
| FGOALS-g3       | r1i1p1f1      | Li, L. J. et al. The Flexible Global Ocean–Atmosphere–Land System Model Grid-Point Version 3 (FGOALS-g3): Description and Evaluation. J. Adv. Model. Earth Syst. (2020) doi:10.1029/2019MS002012.             |
| GFDL-ESM4       | r1i1p1f1      | Dunne, J. P. et al. The GFDL Earth System Model version 4.1 (GFDL-ESM4.1): Overall coupled model description and simulation characteristics. J. Adv. Model. Earth Syst. (2020) doi:10.1029/2019MS002015.      |
| HadGEM3-GC31-LL | r1i1p1f3      | Williams, K. D. et al. The Met Office Global Coupled Model 3.0 and 3.1 (GC3.0 and GC3.1) Configurations. J. Adv. Model. Earth Syst. (2018) doi:10.1002/2017MS001115.                                          |
| IPSL-CM6A-LR    | r1i1p1f1      | Boucher, O., Servonnat, J., Albright, A. L., Aumont, O. & Balkanski, Y. Presentation and evaluation of the IPSL-CM6A-LR climate model. J. Adv. Model. Earth Syst. (2020) doi:10.1029/2019MS002010.            |
| MIROC6          | r1i1p1f1      | Tatebe, H. et al. Description and basic evaluation of simulated mean state, internal variability, and climate sensitivity in MIROC6. Geosci. Model Dev. (2019) doi:10.5194/gmd-12-2727-2019                   |
| MRI-ESM2-0      | r1i1p1f1      | Yukimoto, S. et al. The Meteorological Research Institute Earth system model version 2.0, MRI-ESM2.0: Description and basic evaluation of the physical component. J. Meteorol. Soc. Japan 97, 931–965 (2019). |
| NorESM2-LM      | r1i1p1f1      | Seland, Ø. et al. The Norwegian Earth System Model, NorESM2 – Evaluation of the CMIP6 DECK and historical simulations. Geosci. Model Dev. Discuss. (2020) doi:10.5194/gmd-2019-378.                           |

**Supplementary Table 4.** Summary of the country-specific heat-related mortality impacts (95% confidence interval (CI)) estimated under the two scenarios (mortality fractions, %), the estimated difference interpreted as the historical heat-mortality fraction attributed human-induced climate change, and its corresponding proportion over the estimated fraction under the factual scenario.

| Region                        | Country      | Heat-related mortality in "Natural forcings only" scenario (% - 95% CI) | Heat-related mortality "With natural and anthropogenic forcings" scenario (% - 95% CI) | Heat-related mortality attributed to human-induced climate change (% - 95% CI) | Proportion of heat-related mortality attributed to human-induced climate change (%) |
|-------------------------------|--------------|-------------------------------------------------------------------------|----------------------------------------------------------------------------------------|--------------------------------------------------------------------------------|-------------------------------------------------------------------------------------|
| Australia                     | Australia    | 1.14 [0.36, 2.00]                                                       | 1.78 [0.79, 2.66]                                                                      | 0.63 [0.15, 1.16]                                                              | 35.7                                                                                |
| North America                 | Canada       | 0.65 [0.11, 1.26]                                                       | 1.06 [0.34, 1.74]                                                                      | 0.41 [0.16, 0.79]                                                              | 38.5                                                                                |
| North America                 | USA          | 0.57 [-0.03, 1.22]                                                      | 0.87 [0.08, 1.62]                                                                      | 0.30 [0.01, 0.76]                                                              | 34.7                                                                                |
| Caribbean and Central America | Costa Rica   | 0.25 [-0.61, 1.30]                                                      | 0.69 [-1.38, 2.72]                                                                     | 0.45 [-0.96, 2.12]                                                             | 64.5                                                                                |
| Caribbean and Central America | Guatemala    | 0.23 [-0.25, 1.01]                                                      | 0.95 [-0.63, 2.65]                                                                     | 0.72 [-0.41, 1.99]                                                             | 75.4                                                                                |
| Caribbean and Central America | Mexico       | 0.95 [-0.09, 2.14]                                                      | 1.71 [0.13, 3.19]                                                                      | 0.75 [-0.02, 1.59]                                                             | 44.2                                                                                |
| Caribbean and Central America | Panama       | 0.65 [-0.26, 1.72]                                                      | 1.54 [-1.10, 4.06]                                                                     | 0.88 [-1.27, 2.98]                                                             | 57.4                                                                                |
| Caribbean and Central America | Puerto Rico  | 0.38 [-0.55, 1.37]                                                      | 0.79 [-1.34, 2.82]                                                                     | 0.41 [-0.91, 1.68]                                                             | 51.9                                                                                |
| South America                 | Argentina    | 2.25 [0.82, 5.20]                                                       | 2.83 [1.52, 4.10]                                                                      | 0.58 [-1.50, 1.46]                                                             | 20.5                                                                                |
| South America                 | Brazil       | 0.56 [-0.04, 1.27]                                                      | 1.70 [0.45, 2.96]                                                                      | 1.14 [0.35, 2.15]                                                              | 67.1                                                                                |
| South America                 | Chile        | 1.34 [0.32, 2.61]                                                       | 2.43 [0.95, 4.03]                                                                      | 1.09 [0.43, 2.04]                                                              | 44.9                                                                                |
| South America                 | Colombia     | 0.17 [-0.13, 0.58]                                                      | 0.71 [-0.08, 1.40]                                                                     | 0.54 [0.03, 1.10]                                                              | 76.0                                                                                |
| South America                 | Ecuador      | 0.41 [-0.12, 1.21]                                                      | 1.74 [0.10, 4.03]                                                                      | 1.33 [0.13, 3.36]                                                              | 76.6                                                                                |
| South America                 | Paraguay     | 1.94 [0.10, 6.10]                                                       | 4.62 [2.37, 8.08]                                                                      | 2.68 [1.55, 4.61]                                                              | 58.1                                                                                |
| South America                 | Peru         | 0.42 [-0.04, 1.15]                                                      | 1.59 [0.24, 3.04]                                                                      | 1.17 [0.22, 2.39]                                                              | 73.5                                                                                |
| South America                 | Uruguay      | 2.19 [0.46, 4.86]                                                       | 2.93 [1.14, 4.76]                                                                      | 0.75 [-0.95, 2.25]                                                             | 25.5                                                                                |
| Northern Europe               | Estonia      | 0.68 [-0.04, 1.73]                                                      | 1.06 [0.08, 2.01]                                                                      | 0.38 [-0.05, 0.92]                                                             | 35.4                                                                                |
| Northern Europe               | Finland      | 0.94 [0.30, 1.90]                                                       | 1.62 [0.95, 2.24]                                                                      | 0.68 [0.00, 1.25]                                                              | 42.0                                                                                |
| Northern Europe               | Ireland      | 0.29 [-0.17, 0.96]                                                      | 0.48 [-0.25, 1.22]                                                                     | 0.18 [-0.10, 0.63]                                                             | 38.3                                                                                |
| Northern Europe               | Norway       | 0.47 [0.03, 1.23]                                                       | 0.86 [0.11, 1.66]                                                                      | 0.40 [0.04, 0.92]                                                              | 46.1                                                                                |
| Northern Europe               | Sweden       | 0.60 [0.13, 1.27]                                                       | 0.99 [0.38, 1.59]                                                                      | 0.39 [0.11, 0.80]                                                              | 39.1                                                                                |
| Northern Europe               | UK           | 0.57 [0.16, 1.08]                                                       | 0.88 [0.41, 1.37]                                                                      | 0.31 [0.03, 0.72]                                                              | 35.1                                                                                |
| Western Europe                | France       | 1.33 [0.30, 2.50]                                                       | 2.06 [1.24, 2.91]                                                                      | 0.73 [-0.35, 1.41]                                                             | 35.2                                                                                |
| Western Europe                | Germany      | 1.64 [0.56, 2.87]                                                       | 2.30 [1.37, 3.17]                                                                      | 0.66 [-0.22, 1.50]                                                             | 28.5                                                                                |
| Western Europe                | Netherlands  | 1.24 [0.50, 1.94]                                                       | 1.80 [1.29, 2.34]                                                                      | 0.56 [-0.06, 1.26]                                                             | 31.3                                                                                |
| Western Europe                | Switzerland  | 1.62 [-0.09, 3.83]                                                      | 2.35 [0.46, 4.10]                                                                      | 0.74 [-0.64, 1.78]                                                             | 31.3                                                                                |
| Eastern Europe                | Czech Rep.   | 3.06 [1.42, 4.87]                                                       | 3.95 [2.32, 5.45]                                                                      | 0.89 [-0.10, 1.93]                                                             | 22.6                                                                                |
| Eastern Europe                | Moldova      | 2.96 [1.03, 5.52]                                                       | 3.93 [1.92, 5.98]                                                                      | 0.97 [-0.20, 2.38]                                                             | 24.6                                                                                |
| Eastern Europe                | Romania      | 4.14 [2.04, 6.61]                                                       | 5.54 [3.77, 7.23]                                                                      | 1.39 [-0.08, 3.10]                                                             | 25.2                                                                                |
| Southern Europe               | Greece       | 5.85 [3.59, 8.54]                                                       | 7.91 [5.64, 10.53]                                                                     | 2.06 [0.54, 3.81]                                                              | 26.1                                                                                |
| Southern Europe               | Italy        | 5.12 [2.87, 7.94]                                                       | 7.37 [5.36, 9.32]                                                                      | 2.25 [0.07, 4.35]                                                              | 30.6                                                                                |
| Southern Europe               | Portugal     | 3.30 [2.01, 4.69]                                                       | 4.57 [3.32, 5.72]                                                                      | 1.27 [0.57, 2.36]                                                              | 27.7                                                                                |
| Southern Europe               | Spain        | 4.35 [2.32, 6.78]                                                       | 6.24 [4.54, 7.77]                                                                      | 1.89 [0.28, 3.63]                                                              | 30.3                                                                                |
| Eastern Asia                  | China        | 1.54 [0.45, 2.82]                                                       | 1.95 [0.81, 3.05]                                                                      | 0.42 [-0.34, 1.35]                                                             | 21.3                                                                                |
| Eastern Asia                  | Japan        | 0.65 [0.05, 1.37]                                                       | 0.97 [0.27, 1.66]                                                                      | 0.32 [0.07, 0.73]                                                              | 32.8                                                                                |
| Eastern Asia                  | South Korea  | 0.59 [-0.05, 1.46]                                                      | 0.78 [0.02, 1.50]                                                                      | 0.19 [-0.28, 0.71]                                                             | 23.9                                                                                |
| Eastern Asia                  | Taiwan       | 1.06 [0.11, 2.27]                                                       | 1.75 [0.43, 3.00]                                                                      | 0.69 [0.06, 1.57]                                                              | 39.5                                                                                |
| Southern and Western Asia     | Iran         | 0.72 [-0.17, 1.81]                                                      | 1.96 [-0.15, 4.15]                                                                     | 1.24 [-0.12, 2.98]                                                             | 63.1                                                                                |
| Southern and Western Asia     | Kuwait       | 0.58 [-0.94, 2.29]                                                      | 1.81 [-0.94, 4.24]                                                                     | 1.22 [-0.28, 2.74]                                                             | 67.7                                                                                |
| South-eastern Asia            | Philippines  | 0.67 [-0.31, 2.61]                                                      | 1.74 [-0.32, 5.07]                                                                     | 1.06 [-0.05, 3.25]                                                             | 61.2                                                                                |
| South-eastern Asia            | Thailand     | 1.12 [-0.14, 4.04]                                                      | 2.39 [0.02, 5.59]                                                                      | 1.27 [0.01, 2.67]                                                              | 53.0                                                                                |
| South-eastern Asia            | Vietnam      | 1.57 [0.02, 12.36]                                                      | 3.05 [0.37, 17.51]                                                                     | 1.48 [0.33, 5.13]                                                              | 48.5                                                                                |
| Africa                        | South Africa | 0.47 [-0.27, 1.27]                                                      | 0.84 [-0.26, 1.83]                                                                     | 0.37 [-0.00, 0.88]                                                             | 43.8                                                                                |
| <b>Total</b>                  |              | <b>0.98 [0.26, 1.80]</b>                                                | <b>1.56 [0.62, 2.41]</b>                                                               | <b>0.58 [0.24, 1.14]</b>                                                       | <b>37.0</b>                                                                         |

**Supplementary Table 5.** Summary of the location-specific historical heat-related mortality (95% confidence interval (CI)), expressed as fraction (%), annual number of deaths, and proportion of heat-related mortality attributed to human-induced climate change.

| Location           | Country   | Heat-related mortality attributed to human-induced climate change (% - 95% CI) | Annual average heat-related number of deaths attributed to human-induced climate change (95% CI) | Proportion of heat-related mortality attributed to human-induced climate change (%) |
|--------------------|-----------|--------------------------------------------------------------------------------|--------------------------------------------------------------------------------------------------|-------------------------------------------------------------------------------------|
| Buenos Aires       | Argentina | 0.56 [-1.54, 1.48]                                                             | 68 [-187, 180]                                                                                   | 20.7                                                                                |
| Cordoba            | Argentina | 0.61 [-1.44, 1.62]                                                             | 21 [-50, 56]                                                                                     | 21.6                                                                                |
| Rosario            | Argentina | 0.60 [-1.62, 1.73]                                                             | 21 [-57, 61]                                                                                     | 18.8                                                                                |
| Brisbane           | Australia | 0.73 [0.23, 1.86]                                                              | 20 [7, 52]                                                                                       | 35.5                                                                                |
| Melbourne          | Australia | 0.50 [0.09, 1.08]                                                              | 33 [6, 71]                                                                                       | 35.2                                                                                |
| Sydney             | Australia | 0.71 [0.07, 1.44]                                                              | 53 [5, 108]                                                                                      | 36.0                                                                                |
| Belem              | Brazil    | 1.54 [-0.54, 4.73]                                                             | 44 [-16, 136]                                                                                    | 79.5                                                                                |
| Belo Horizonte     | Brazil    | 1.67 [0.52, 4.72]                                                              | 181 [57, 514]                                                                                    | 73.7                                                                                |
| Brasilia           | Brazil    | 0.88 [-0.18, 2.17]                                                             | 23 [-5, 55]                                                                                      | 66.0                                                                                |
| Curitiba           | Brazil    | 0.90 [0.13, 2.03]                                                              | 29 [4, 65]                                                                                       | 56.8                                                                                |
| Cuiaba             | Brazil    | 1.74 [-0.10, 4.22]                                                             | 19 [-1, 47]                                                                                      | 67.3                                                                                |
| Fortaleza          | Brazil    | 1.00 [-0.37, 2.64]                                                             | 44 [-16, 116]                                                                                    | 84.9                                                                                |
| Goiania            | Brazil    | 1.24 [0.13, 2.87]                                                              | 37 [4, 86]                                                                                       | 70.4                                                                                |
| Joao Pessoa        | Brazil    | 1.48 [0.14, 2.99]                                                              | 22 [2, 44]                                                                                       | 84.0                                                                                |
| Maceio             | Brazil    | 0.47 [-0.37, 1.32]                                                             | 10 [-8, 27]                                                                                      | 78.1                                                                                |
| Manaus             | Brazil    | 2.20 [0.27, 7.19]                                                              | 47 [6, 155]                                                                                      | 73.9                                                                                |
| Natal              | Brazil    | 0.72 [-0.63, 2.07]                                                             | 13 [-11, 37]                                                                                     | 85.9                                                                                |
| Porto Alegre       | Brazil    | 1.03 [0.04, 2.21]                                                              | 46 [2, 100]                                                                                      | 41.6                                                                                |
| Recife             | Brazil    | 1.10 [0.10, 2.25]                                                              | 64 [6, 131]                                                                                      | 81.2                                                                                |
| Sao Luis           | Brazil    | 1.05 [-0.13, 2.15]                                                             | 18 [-2, 38]                                                                                      | 71.7                                                                                |
| Salvador           | Brazil    | -0.15 [-1.12, 0.40]                                                            | -8 [-56, 20]                                                                                     | 84.0                                                                                |
| Sao Paulo          | Brazil    | 1.14 [0.41, 2.57]                                                              | 239 [86, 536]                                                                                    | 61.4                                                                                |
| Teresina           | Brazil    | 1.92 [0.34, 4.00]                                                              | 28 [5, 58]                                                                                       | 62.3                                                                                |
| Vitoria            | Brazil    | 0.90 [-0.04, 2.51]                                                             | 10 [-0, 29]                                                                                      | 66.5                                                                                |
| Abbotsford         | Canada    | 0.40 [0.05, 1.02]                                                              | 2 [0, 6]                                                                                         | 52.4                                                                                |
| Calgary            | Canada    | 0.16 [-0.33, 0.71]                                                             | 3 [-6, 13]                                                                                       | 30.5                                                                                |
| Edmonton           | Canada    | 0.21 [-0.17, 0.71]                                                             | 4 [-3, 15]                                                                                       | 41.3                                                                                |
| Halifax            | Canada    | 0.17 [-0.13, 0.64]                                                             | 1 [-1, 6]                                                                                        | 44.1                                                                                |
| Hamilton           | Canada    | 0.33 [-0.03, 0.84]                                                             | 4 [-0, 11]                                                                                       | 39.8                                                                                |
| Kingston           | Canada    | 0.10 [-0.34, 0.59]                                                             | 1 [-2, 3]                                                                                        | 42.1                                                                                |
| Kitchener-Waterloo | Canada    | 0.51 [-0.06, 1.08]                                                             | 5 [-1, 10]                                                                                       | 41.6                                                                                |
| London Ontario     | Canada    | 0.19 [-0.08, 0.64]                                                             | 2 [-1, 7]                                                                                        | 37.1                                                                                |
| Montreal           | Canada    | 1.06 [0.54, 1.59]                                                              | 50 [25, 75]                                                                                      | 46.3                                                                                |
| Niagara            | Canada    | 0.23 [-0.05, 0.72]                                                             | 3 [-1, 9]                                                                                        | 36.3                                                                                |
| Oakville           | Canada    | 0.24 [-0.14, 0.79]                                                             | 2 [-1, 6]                                                                                        | 40.4                                                                                |
| Oshawa             | Canada    | 0.24 [-0.17, 0.74]                                                             | 2 [-2, 7]                                                                                        | 38.9                                                                                |
| Ottawa             | Canada    | 0.36 [-0.07, 0.89]                                                             | 7 [-1, 17]                                                                                       | 30.6                                                                                |
| Regina             | Canada    | 0.27 [-0.56, 1.03]                                                             | 2 [-4, 6]                                                                                        | 32.1                                                                                |
| Samia              | Canada    | 0.17 [-0.21, 0.77]                                                             | 1 [-1, 3]                                                                                        | 31.6                                                                                |
| Sudbury            | Canada    | 0.17 [-0.29, 0.71]                                                             | 1 [-2, 4]                                                                                        | 39.6                                                                                |
| Saint John NB      | Canada    | -0.00 [-0.06, 0.05]                                                            | -0 [-0, 0]                                                                                       | 63.4                                                                                |
| St. John's NFL     | Canada    | -0.00 [-0.10, 0.08]                                                            | -0 [-1, 1]                                                                                       | 54.0                                                                                |
| Sault Ste. Marie   | Canada    | 0.36 [-0.12, 1.04]                                                             | 1 [-0, 4]                                                                                        | 36.6                                                                                |
| Saskatoon          | Canada    | 0.31 [-0.20, 0.92]                                                             | 2 [-1, 7]                                                                                        | 36.5                                                                                |
| Thunder Bay        | Canada    | 0.21 [-0.19, 0.82]                                                             | 1 [-1, 4]                                                                                        | 38.4                                                                                |
| Toronto            | Canada    | 0.49 [0.16, 1.01]                                                              | 44 [14, 89]                                                                                      | 30.2                                                                                |
| Victoria           | Canada    | 0.21 [-0.04, 0.61]                                                             | 2 [-0, 6]                                                                                        | 49.4                                                                                |
| Vancouver          | Canada    | 0.48 [0.03, 0.94]                                                              | 20 [1, 39]                                                                                       | 51.5                                                                                |
| Windsor            | Canada    | 0.33 [-0.09, 1.02]                                                             | 3 [-1, 9]                                                                                        | 36.9                                                                                |
| Winnipeg           | Canada    | 0.06 [-0.24, 0.41]                                                             | 1 [-5, 9]                                                                                        | 34.6                                                                                |
| Anshan             | China     | 0.14 [-0.31, 0.77]                                                             | 4 [-10, 24]                                                                                      | 17.7                                                                                |
| Beijing            | China     | 0.18 [-2.00, 2.19]                                                             | 19 [-211, 231]                                                                                   | 8.3                                                                                 |
| Fuzhou             | China     | 0.77 [-0.76, 2.76]                                                             | 14 [-14, 50]                                                                                     | 31.0                                                                                |
| Hong Kong          | China     | 0.29 [-0.13, 0.77]                                                             | 28 [-12, 75]                                                                                     | 59.2                                                                                |
| Hangzhou           | China     | 0.30 [-0.13, 1.20]                                                             | 6 [-3, 26]                                                                                       | 24.9                                                                                |
| Lanzhou            | China     | 0.16 [-0.06, 0.50]                                                             | 3 [-1, 11]                                                                                       | 41.0                                                                                |
| Shanghai           | China     | 0.23 [-0.71, 1.08]                                                             | 29 [-87, 134]                                                                                    | 17.0                                                                                |
| Shenyang           | China     | 0.37 [-0.77, 1.97]                                                             | 28 [-58, 150]                                                                                    | 20.2                                                                                |
| Suzhu              | China     | 0.81 [-1.01, 2.76]                                                             | 30 [-37, 101]                                                                                    | 21.0                                                                                |
| Taiyuan            | China     | 0.50 [-2.48, 2.02]                                                             | 14 [-69, 57]                                                                                     | 16.6                                                                                |
| Tianjin            | China     | 0.08 [-2.72, 2.75]                                                             | 1 [-33, 33]                                                                                      | 2.5                                                                                 |

|                                       |                |                     |                |      |
|---------------------------------------|----------------|---------------------|----------------|------|
| Wulumuqi                              | China          | 0.70 [-0.32, 2.03]  | 14 [-6, 41]    | 32.0 |
| Wuhan                                 | China          | 1.28 [-0.76, 3.43]  | 77 [-46, 206]  | 27.8 |
| Xian                                  | China          | 0.51 [-0.41, 1.58]  | 15 [-12, 46]   | 29.7 |
| Chillan                               | Chile          | 1.39 [0.28, 2.81]   | 5 [1, 11]      | 52.5 |
| Santiago                              | Chile          | 1.22 [0.48, 2.30]   | 136 [54, 255]  | 44.3 |
| Temuco                                | Chile          | 0.44 [0.02, 1.00]   | 2 [0, 6]       | 50.3 |
| Valparaiso                            | Chile          | 0.34 [-0.06, 0.85]  | 6 [-1, 14]     | 51.4 |
| Bogota                                | Colombia       | -0.09 [-0.36, 0.08] | -8 [-33, 7]    | 92.6 |
| Barranquilla                          | Colombia       | 1.63 [0.21, 3.34]   | 33 [4, 67]     | 85.2 |
| Cali                                  | Colombia       | 0.88 [-0.14, 1.98]  | 34 [-6, 78]    | 71.0 |
| Cartagena                             | Colombia       | 1.58 [-0.17, 3.85]  | 18 [-2, 45]    | 85.2 |
| Medellin                              | Colombia       | 0.75 [-0.05, 1.74]  | 32 [-2, 73]    | 72.1 |
| San José (CR)                         | Costa Rica     | 0.45 [-0.96, 2.12]  | 3 [-5, 12]     | 64.5 |
| Brno                                  | Czech Republic | 1.01 [-0.24, 2.22]  | 13 [-3, 29]    | 21.2 |
| Ostrava                               | Czech Republic | 1.02 [-0.21, 2.17]  | 12 [-2, 25]    | 22.4 |
| Prague                                | Czech Republic | 0.94 [-0.16, 1.97]  | 39 [-7, 83]    | 23.6 |
| South Bohemia                         | Czech Republic | 0.76 [-0.12, 1.73]  | 29 [-5, 65]    | 22.1 |
| Guayaquil                             | Ecuador        | 1.54 [0.05, 4.05]   | 69 [2, 181]    | 77.7 |
| Quito                                 | Ecuador        | 1.01 [0.11, 2.43]   | 28 [3, 68]     | 74.0 |
| Kohtla-Järve linn                     | Estonia        | 0.25 [-0.12, 0.74]  | 1 [-0, 2]      | 35.8 |
| Narva linn                            | Estonia        | 0.34 [-0.15, 0.87]  | 1 [-0, 2]      | 36.8 |
| Pärnu linn                            | Estonia        | 0.42 [-0.03, 1.06]  | 1 [-0, 2]      | 36.3 |
| Tallinn                               | Estonia        | 0.41 [-0.01, 1.01]  | 6 [-0, 14]     | 35.6 |
| Tartu linn                            | Estonia        | 0.30 [-0.16, 0.94]  | 1 [-1, 3]      | 32.6 |
| Helsinki                              | Finland        | 0.68 [0.00, 1.25]   | 16 [0, 29]     | 42.0 |
| Bordeaux                              | France         | 0.69 [-1.21, 1.91]  | 11 [-19, 29]   | 32.5 |
| Clermont-Ferrand                      | France         | 0.63 [-1.30, 1.79]  | 4 [-9, 12]     | 30.3 |
| Dijon                                 | France         | 0.57 [-0.95, 1.42]  | 3 [-5, 8]      | 33.4 |
| Grenoble                              | France         | 0.90 [-1.25, 1.86]  | 9 [-12, 18]    | 37.5 |
| Le Havre                              | France         | 0.30 [-0.01, 0.69]  | 2 [-0, 5]      | 38.2 |
| Lille                                 | France         | 0.35 [-0.05, 0.70]  | 9 [-1, 18]     | 32.5 |
| Lens-Douai                            | France         | 0.54 [-0.06, 1.27]  | 6 [-1, 13]     | 28.9 |
| Lyon                                  | France         | 0.80 [-1.60, 1.91]  | 18 [-36, 42]   | 31.1 |
| Montpellier                           | France         | 0.97 [-1.19, 2.33]  | 8 [-9, 18]     | 44.4 |
| Marseille                             | France         | 0.89 [0.01, 1.91]   | 24 [0, 51]     | 46.3 |
| Nice                                  | France         | 0.81 [-0.01, 1.71]  | 12 [-0, 25]    | 56.4 |
| Nancy                                 | France         | 0.54 [-0.50, 1.30]  | 5 [-4, 11]     | 31.7 |
| Nantes                                | France         | 0.46 [-0.18, 0.94]  | 6 [-2, 12]     | 34.6 |
| Paris                                 | France         | 0.84 [-0.21, 1.58]  | 110 [-28, 206] | 33.9 |
| Rennes                                | France         | 0.30 [-0.14, 0.69]  | 1 [-1, 3]      | 33.6 |
| Rouen                                 | France         | 0.51 [-0.07, 1.30]  | 6 [-1, 15]     | 28.5 |
| Strasbourg                            | France         | 0.70 [-0.42, 1.53]  | 7 [-4, 16]     | 36.1 |
| Toulouse                              | France         | 0.70 [-0.77, 1.82]  | 10 [-11, 26]   | 34.5 |
| Berlin                                | Germany        | 0.71 [-0.46, 1.65]  | 80 [-52, 185]  | 28.8 |
| Bremen                                | Germany        | 0.50 [-0.16, 1.18]  | 10 [-3, 24]    | 26.9 |
| Dresden                               | Germany        | 0.64 [-0.26, 1.39]  | 11 [-4, 24]    | 33.4 |
| Dortmund                              | Germany        | 0.78 [-0.33, 2.14]  | 17 [-7, 46]    | 27.8 |
| Duesseldorf                           | Germany        | 0.72 [-0.26, 1.71]  | 16 [-6, 38]    | 25.8 |
| Frankfurt                             | Germany        | 0.68 [-0.51, 1.46]  | 16 [-12, 34]   | 29.6 |
| Hamburg                               | Germany        | 0.45 [-0.14, 0.99]  | 28 [-9, 61]    | 30.6 |
| Hannover                              | Germany        | 0.54 [-0.09, 1.50]  | 21 [-4, 58]    | 28.6 |
| Koeln                                 | Germany        | 0.75 [-0.54, 1.77]  | 24 [-17, 56]   | 28.1 |
| Leipzig                               | Germany        | 0.74 [-0.27, 1.78]  | 16 [-6, 38]    | 30.0 |
| Muenchen                              | Germany        | 0.69 [-0.22, 1.43]  | 28 [-9, 58]    | 23.9 |
| Stuttgart                             | Germany        | 0.82 [-0.51, 1.67]  | 15 [-10, 32]   | 34.6 |
| Athens                                | Greece         | 2.06 [0.54, 3.81]   | 189 [50, 349]  | 26.1 |
| Guatemala                             | Guatemala      | 0.72 [-0.41, 1.99]  | 19 [-11, 52]   | 75.4 |
| East of Northern Ireland              | Ireland        | 0.13 [-0.21, 0.61]  | 4 [-6, 17]     | 38.0 |
| North East of the Republic of Ireland | Ireland        | 0.29 [-0.13, 0.95]  | 4 [-2, 13]     | 38.2 |
| North West of the Republic of Ireland | Ireland        | -0.01 [-0.19, 0.12] | -0 [-2, 1]     | 40.5 |
| South East of Republic of Ireland     | Ireland        | 0.13 [-0.32, 0.67]  | 4 [-10, 21]    | 37.3 |
| South West of the Republic of Ireland | Ireland        | 0.30 [-0.11, 1.00]  | 10 [-4, 34]    | 39.9 |
| West of Northern Ireland              | Ireland        | 0.15 [-0.26, 0.72]  | 3 [-4, 12]     | 34.5 |
| Mashhad                               | Iran           | 1.24 [-0.12, 2.98]  | 51 [-5, 123]   | 63.1 |
| Bari                                  | Italy          | 1.55 [-0.04, 3.11]  | 12 [-0, 25]    | 24.4 |
| Bologna                               | Italy          | 2.07 [-1.19, 4.51]  | 28 [-16, 62]   | 23.7 |
| Brescia                               | Italy          | 2.33 [-0.20, 4.26]  | 15 [-1, 27]    | 30.9 |
| Civitavecchia                         | Italy          | 3.11 [0.00, 5.96]   | 3 [0, 6]       | 36.2 |
| Frosinone                             | Italy          | 2.73 [0.29, 6.10]   | 2 [0, 5]       | 30.9 |

|           |             |                     |               |      |
|-----------|-------------|---------------------|---------------|------|
| Genoa     | Italy       | 1.59 [-0.50, 2.96]  | 39 [-12, 72]  | 36.3 |
| Latina    | Italy       | 2.54 [0.19, 5.78]   | 5 [0, 12]     | 33.2 |
| Palermo   | Italy       | 1.68 [0.32, 3.11]   | 27 [5, 50]    | 28.5 |
| Rome      | Italy       | 2.56 [0.32, 5.03]   | 172 [21, 338] | 32.0 |
| Turin     | Italy       | 2.74 [-0.36, 5.56]  | 63 [-8, 127]  | 30.2 |
| Viterbo   | Italy       | 1.80 [-0.11, 3.60]  | 3 [-0, 6]     | 25.6 |
| Aichi     | Japan       | 0.62 [0.13, 1.26]   | 93 [20, 191]  | 38.7 |
| Akita     | Japan       | 0.19 [-0.40, 0.55]  | 8 [-16, 21]   | 25.6 |
| Aomori    | Japan       | 0.18 [-0.66, 0.66]  | 8 [-29, 29]   | 17.5 |
| Chiba     | Japan       | 0.19 [0.01, 0.52]   | 24 [1, 67]    | 38.2 |
| Ehime     | Japan       | 0.55 [0.04, 1.31]   | 25 [2, 58]    | 31.6 |
| Fukushima | Japan       | 0.15 [-0.09, 0.48]  | 9 [-5, 28]    | 31.6 |
| Fukuoka   | Japan       | 0.21 [-0.14, 0.61]  | 26 [-17, 77]  | 30.6 |
| Fukui     | Japan       | -0.01 [-0.06, 0.02] | -0 [-1, 0]    | 46.5 |
| Gifu      | Japan       | 0.47 [0.08, 1.12]   | 25 [4, 60]    | 31.3 |
| Gunma     | Japan       | 0.28 [0.02, 0.64]   | 15 [1, 34]    | 32.4 |
| Hokkaido  | Japan       | 0.06 [-0.32, 0.32]  | 10 [-50, 49]  | 15.2 |
| Hiroshima | Japan       | 0.27 [-0.00, 0.77]  | 21 [-0, 58]   | 34.9 |
| Hyogo     | Japan       | 0.36 [0.02, 0.86]   | 50 [3, 118]   | 35.8 |
| Ibaraki   | Japan       | 0.19 [-0.08, 0.57]  | 14 [-6, 42]   | 26.7 |
| Ishikawa  | Japan       | 0.24 [-0.07, 0.71]  | 7 [-2, 22]    | 26.6 |
| Iwate     | Japan       | 0.13 [-0.28, 0.48]  | 6 [-12, 20]   | 25.2 |
| Kagawa    | Japan       | 0.44 [0.04, 1.06]   | 13 [1, 31]    | 37.0 |
| Kagoshima | Japan       | 0.43 [-0.13, 1.26]  | 24 [-7, 70]   | 28.5 |
| Kumamoto  | Japan       | -0.03 [-0.13, 0.02] | -1 [-7, 1]    | 59.6 |
| Kanagawa  | Japan       | 0.46 [0.10, 1.02]   | 80 [17, 177]  | 36.9 |
| Kochi     | Japan       | -0.01 [-0.10, 0.11] | -0 [-3, 3]    | 28.9 |
| Kyoto     | Japan       | 0.34 [0.03, 0.83]   | 22 [2, 55]    | 36.1 |
| Mie       | Japan       | 0.27 [0.03, 0.71]   | 13 [1, 35]    | 36.3 |
| Miyagi    | Japan       | 0.11 [-0.15, 0.40]  | 6 [-9, 23]    | 28.0 |
| Miyazaki  | Japan       | 0.22 [-0.17, 0.78]  | 7 [-5, 26]    | 27.1 |
| Nagano    | Japan       | 0.23 [-0.03, 0.63]  | 14 [-2, 39]   | 26.9 |
| Nara      | Japan       | 0.35 [0.00, 1.01]   | 12 [0, 35]    | 27.8 |
| Nagasaki  | Japan       | 0.12 [-0.30, 0.65]  | 5 [-13, 29]   | 20.3 |
| Niigata   | Japan       | 0.33 [-0.16, 0.77]  | 23 [-12, 55]  | 27.1 |
| Oita      | Japan       | 0.26 [-0.11, 0.84]  | 9 [-4, 30]    | 25.6 |
| Okinawa   | Japan       | 0.37 [-0.46, 1.30]  | 10 [-13, 36]  | 44.4 |
| Okayama   | Japan       | 0.26 [-0.02, 0.76]  | 14 [-1, 41]   | 31.9 |
| Osaka     | Japan       | 0.46 [0.06, 0.96]   | 94 [12, 197]  | 39.1 |
| Saga      | Japan       | 0.24 [-0.20, 0.99]  | 6 [-5, 25]    | 18.3 |
| Saitama   | Japan       | 0.41 [0.10, 0.87]   | 57 [14, 122]  | 36.1 |
| Shiga     | Japan       | 0.28 [-0.10, 0.88]  | 8 [-3, 27]    | 24.0 |
| Shimane   | Japan       | 0.14 [-0.09, 0.50]  | 3 [-2, 12]    | 37.5 |
| Shizuoka  | Japan       | 0.32 [0.05, 0.77]   | 29 [4, 71]    | 42.1 |
| Tochigi   | Japan       | 0.37 [0.05, 0.88]   | 19 [3, 45]    | 25.9 |
| Tokushima | Japan       | 0.09 [-0.33, 0.61]  | 2 [-8, 16]    | 22.7 |
| Tokyo     | Japan       | 0.56 [0.15, 1.22]   | 156 [41, 339] | 35.6 |
| Toyama    | Japan       | 0.31 [-0.03, 0.84]  | 10 [-1, 27]   | 28.8 |
| Tottori   | Japan       | 0.23 [-0.09, 0.73]  | 4 [-2, 14]    | 29.5 |
| Wakayama  | Japan       | 0.13 [-0.31, 0.66]  | 4 [-10, 22]   | 20.6 |
| Yamaguchi | Japan       | 0.25 [-0.39, 0.94]  | 12 [-19, 45]  | 21.7 |
| Yamagata  | Japan       | 0.15 [-0.02, 0.46]  | 6 [-1, 18]    | 38.8 |
| Yamanashi | Japan       | 0.29 [-0.10, 0.89]  | 7 [-2, 21]    | 36.2 |
| Andong    | South Korea | 0.26 [-0.31, 1.12]  | 1 [-1, 5]     | 21.6 |
| Boryeong  | South Korea | 0.20 [-0.93, 1.37]  | 1 [-3, 4]     | 16.4 |
| Busan     | South Korea | 0.11 [-0.13, 0.50]  | 7 [-8, 31]    | 27.6 |
| Chuncheon | South Korea | 0.27 [-0.43, 1.25]  | 1 [-2, 6]     | 18.7 |
| Chungju   | South Korea | 0.17 [-0.32, 1.00]  | 1 [-1, 5]     | 21.7 |
| Cheonan   | South Korea | 0.31 [-0.99, 1.41]  | 2 [-7, 10]    | 22.3 |
| Daegu     | South Korea | 0.29 [-0.10, 0.91]  | 11 [-4, 34]   | 27.2 |
| Daejeon   | South Korea | 0.16 [-0.44, 0.79]  | 3 [-8, 15]    | 18.5 |
| Donghae   | South Korea | 0.07 [-0.22, 0.51]  | 0 [-0, 1]     | 20.9 |
| Geojae    | South Korea | 0.15 [-0.32, 0.86]  | 0 [-1, 3]     | 27.8 |
| Gangneung | South Korea | 0.20 [-0.29, 0.83]  | 1 [-1, 4]     | 20.9 |
| Gumi      | South Korea | 0.16 [-0.42, 0.97]  | 1 [-2, 4]     | 18.7 |
| Gwangju   | South Korea | 0.21 [-0.40, 0.90]  | 4 [-8, 18]    | 21.5 |
| Icheon    | South Korea | 0.19 [-0.54, 1.07]  | 1 [-2, 4]     | 22.5 |
| Incheon   | South Korea | 0.12 [-0.31, 0.61]  | 5 [-12, 23]   | 24.9 |
| Jecheon   | South Korea | 0.24 [-0.47, 1.27]  | 1 [-1, 4]     | 19.5 |
| Jeju      | South Korea | 0.03 [-0.45, 0.55]  | 0 [-2, 3]     | 10.5 |
| Jinju     | South Korea | 0.38 [-0.15, 1.36]  | 2 [-1, 8]     | 28.2 |
| Jeongeup  | South Korea | 0.15 [-0.40, 0.84]  | 1 [-2, 3]     | 16.2 |
| Milyang   | South Korea | 0.17 [-0.27, 0.94]  | 1 [-1, 3]     | 25.4 |



|                  |             |                    |                 |      |
|------------------|-------------|--------------------|-----------------|------|
| Mungyeong        | South Korea | 0.33 [-0.37, 1.36] | 1 [-1, 4]       | 25.3 |
| Mokpo            | South Korea | 0.12 [-0.51, 0.90] | 0 [-2, 4]       | 13.6 |
| Namwon           | South Korea | 0.29 [-0.70, 1.39] | 1 [-2, 4]       | 22.6 |
| Pohang           | South Korea | 0.13 [-0.19, 0.61] | 1 [-2, 5]       | 23.6 |
| Seoul            | South Korea | 0.19 [-0.38, 0.78] | 24 [-49, 99]    | 24.8 |
| Seosan           | South Korea | 0.07 [-0.62, 0.86] | 0 [-2, 3]       | 15.0 |
| Seogyupo         | South Korea | 0.07 [-0.61, 0.84] | 0 [-1, 2]       | 14.1 |
| Sokcho           | South Korea | 0.11 [-0.22, 0.61] | 0 [-0, 1]       | 20.6 |
| Suwon            | South Korea | 0.20 [-0.49, 0.96] | 2 [-6, 11]      | 23.7 |
| Taebaek          | South Korea | 0.17 [-0.37, 0.97] | 0 [-0, 1]       | 22.4 |
| Tongyeong        | South Korea | 0.28 [-0.43, 1.32] | 1 [-1, 4]       | 26.2 |
| Ulsan            | South Korea | 0.21 [-0.14, 0.74] | 3 [-2, 10]      | 28.7 |
| Wonju            | South Korea | 0.15 [-0.38, 0.91] | 1 [-2, 5]       | 17.8 |
| Yeosu            | South Korea | 0.34 [-0.41, 1.39] | 2 [-2, 8]       | 26.4 |
| Yoengcheon       | South Korea | 0.14 [-0.29, 0.81] | 0 [-1, 3]       | 20.6 |
| Yeongju          | South Korea | 0.20 [-0.41, 1.17] | 1 [-1, 4]       | 21.6 |
| Kuwait           | Kuwait      | 1.22 [-0.28, 2.74] | 16 [-4, 36]     | 67.7 |
| Ciudad Juarez    | Mexico      | 1.36 [-0.02, 3.25] | 22 [-0, 53]     | 38.6 |
| Comarca Lagunera | Mexico      | 1.74 [0.17, 3.64]  | 32 [3, 67]      | 40.5 |
| Guadalajara      | Mexico      | 1.39 [0.38, 2.69]  | 92 [25, 178]    | 58.8 |
| Leon             | Mexico      | 0.41 [-1.27, 1.41] | 8 [-26, 28]     | 38.0 |
| Monterrey        | Mexico      | 1.71 [0.63, 3.57]  | 90 [33, 188]    | 37.3 |
| Puebla-Tlaxcala  | Mexico      | 0.62 [-0.36, 1.63] | 23 [-14, 62]    | 45.1 |
| San Luis Potosi  | Mexico      | 0.73 [-0.66, 1.70] | 10 [-9, 24]     | 39.9 |
| Tijuana          | Mexico      | 0.26 [-0.27, 0.90] | 5 [-5, 16]      | 17.1 |
| Toluca de Lerdo  | Mexico      | 0.65 [-0.81, 1.89] | 15 [-19, 45]    | 51.7 |
| Valley of Mexico | Mexico      | 0.41 [-0.45, 1.12] | 115 [-125, 313] | 47.1 |
| Anenii Noi       | Moldova     | 1.10 [-0.11, 2.56] | 0 [-0, 1]       | 29.4 |
| Cahul            | Moldova     | 0.90 [-0.54, 2.55] | 1 [-1, 3]       | 21.5 |
| Chisinau         | Moldova     | 0.97 [-0.21, 2.36] | 17 [-4, 41]     | 24.6 |
| Falesti          | Moldova     | 1.08 [-0.17, 2.98] | 1 [-0, 2]       | 27.8 |
| Noord-Nederland  | Netherlands | 0.51 [-0.09, 1.23] | 25 [-5, 61]     | 30.6 |
| Oost-Nederland   | Netherlands | 0.56 [-0.18, 1.22] | 50 [-16, 109]   | 32.0 |
| West-Nederland   | Netherlands | 0.49 [0.04, 1.10]  | 100 [8, 223]    | 36.7 |
| Zuid-Nederland   | Netherlands | 0.73 [-0.16, 1.72] | 69 [-16, 163]   | 25.6 |
| Oslo             | Norway      | 0.40 [0.04, 0.92]  | 6 [1, 15]       | 46.1 |
| Panama           | Panama      | 0.88 [-1.27, 2.98] | 9 [-12, 29]     | 57.4 |
| Asuncion         | Paraguay    | 2.68 [1.55, 4.61]  | 26 [15, 45]     | 58.1 |
| apurimac         | Peru        | 1.15 [-0.79, 4.20] | 5 [-4, 19]      | 75.8 |
| arequipa         | Peru        | 0.90 [0.01, 1.95]  | 13 [0, 29]      | 80.2 |
| ayacucho         | Peru        | 0.55 [-0.09, 1.62] | 3 [-1, 9]       | 78.5 |
| cajamarca        | Peru        | 1.15 [-0.02, 2.39] | 12 [-0, 25]     | 71.6 |
| cusco            | Peru        | 0.96 [-0.13, 2.26] | 12 [-2, 28]     | 73.7 |
| huancavelica     | Peru        | 0.32 [-0.58, 1.69] | 1 [-3, 8]       | 79.1 |
| huanuco          | Peru        | 0.97 [-0.22, 2.20] | 8 [-2, 18]      | 63.1 |
| ica              | Peru        | 0.95 [-0.02, 2.00] | 10 [-0, 21]     | 73.3 |
| junin            | Peru        | 0.56 [-0.38, 2.17] | 9 [-6, 35]      | 75.9 |
| lima             | Peru        | 1.11 [-0.16, 3.60] | 129 [-19, 418]  | 81.4 |
| la libertad      | Peru        | 1.77 [0.55, 3.18]  | 39 [12, 71]     | 71.2 |
| lambayeque       | Peru        | 1.63 [0.59, 2.94]  | 27 [10, 49]     | 65.3 |
| loreto           | Peru        | 2.55 [-0.34, 7.16] | 9 [-1, 25]      | 80.0 |
| piura            | Peru        | 1.23 [-0.56, 2.70] | 26 [-12, 57]    | 49.7 |
| puno             | Peru        | 1.43 [-0.93, 4.45] | 29 [-19, 89]    | 86.8 |
| san martin       | Peru        | 1.08 [-0.28, 3.02] | 6 [-1, 16]      | 63.2 |
| tacna            | Peru        | 1.35 [0.19, 2.73]  | 5 [1, 11]       | 75.5 |
| ucayali          | Peru        | 1.57 [-0.05, 3.60] | 8 [-0, 18]      | 75.8 |
| Cebu             | Philippines | 0.92 [-0.54, 3.70] | 27 [-16, 109]   | 65.0 |
| Davao            | Philippines | 1.31 [-0.70, 5.26] | 38 [-20, 153]   | 72.1 |
| Manila           | Philippines | 1.03 [-0.00, 3.35] | 64 [-0, 207]    | 58.2 |
| Quezon           | Philippines | 1.05 [0.05, 2.80]  | 64 [3, 172]     | 57.4 |
| Beja             | Portugal    | 1.60 [0.60, 3.17]  | 12 [4, 23]      | 24.5 |
| Coimbra          | Portugal    | 1.38 [0.44, 2.69]  | 20 [7, 40]      | 29.1 |
| Castelo Branco   | Portugal    | 2.18 [1.29, 3.80]  | 19 [11, 33]     | 27.5 |
| Lisboa           | Portugal    | 1.08 [0.49, 2.10]  | 68 [31, 133]    | 24.7 |
| Porto            | Portugal    | 1.27 [-0.02, 2.58] | 53 [-1, 109]    | 33.4 |
| San Juan         | Puertorico  | 0.41 [-0.91, 1.68] | 5 [-10, 19]     | 51.9 |
| Bucharest        | Romania     | 1.47 [-0.35, 3.40] | 103 [-25, 238]  | 24.3 |
| Brasov           | Romania     | 1.06 [0.18, 2.33]  | 9 [2, 19]       | 31.1 |
| Cluj-Napoca      | Romania     | 1.36 [0.37, 3.01]  | 12 [3, 27]      | 26.3 |
| Constanta        | Romania     | 1.20 [-0.29, 2.78] | 12 [-3, 28]     | 26.9 |
| Craiova          | Romania     | 1.21 [0.01, 2.90]  | 9 [0, 23]       | 23.0 |
| Galati           | Romania     | 1.19 [-0.47, 2.79] | 10 [-4, 22]     | 23.9 |
| Iasi             | Romania     | 1.18 [-0.39, 2.73] | 10 [-3, 23]     | 25.8 |

|                           |              |                     |               |      |
|---------------------------|--------------|---------------------|---------------|------|
| Timisoara                 | Romania      | 1.86 [-0.12, 3.83]  | 18 [-1, 37]   | 28.5 |
| Alfred Nzo                | South Africa | 0.30 [-0.19, 0.95]  | 7 [-4, 21]    | 37.1 |
| Amathole                  | South Africa | 0.28 [-0.08, 0.91]  | 13 [-4, 42]   | 27.3 |
| Buffalo City              | South Africa | -0.01 [-0.05, 0.02] | -0 [-2, 1]    | 58.1 |
| Bojanala                  | South Africa | 0.49 [-0.10, 1.37]  | 20 [-4, 55]   | 49.2 |
| Cacadu                    | South Africa | 0.32 [-0.09, 1.02]  | 4 [-1, 14]    | 32.6 |
| Chris Hani                | South Africa | 0.28 [0.00, 0.77]   | 8 [0, 21]     | 43.8 |
| Central Karoo             | South Africa | 0.56 [-0.00, 1.37]  | 1 [-0, 4]     | 35.5 |
| City of Cape Town         | South Africa | 0.21 [-0.17, 0.62]  | 17 [-13, 50]  | 34.3 |
| Capricorn                 | South Africa | 0.41 [-0.48, 1.26]  | 16 [-19, 49]  | 37.7 |
| Cape Winelands            | South Africa | 0.77 [0.24, 1.44]   | 15 [4, 27]    | 42.7 |
| City of Johannesburg      | South Africa | 0.37 [0.01, 0.87]   | 37 [1, 86]    | 59.8 |
| City of Tshwane           | South Africa | 0.17 [-0.53, 0.90]  | 11 [-36, 61]  | 59.7 |
| Dr Kenneth Kaunda         | South Africa | 0.46 [-0.23, 1.41]  | 13 [-7, 41]   | 44.0 |
| Dr Ruth Segomotsi Mompoti | South Africa | 0.57 [-0.14, 1.62]  | 9 [-2, 26]    | 44.5 |
| Eden                      | South Africa | 0.46 [0.08, 0.99]   | 7 [1, 15]     | 36.0 |
| Ehlanzeni                 | South Africa | 0.58 [-0.11, 1.46]  | 29 [-6, 72]   | 54.0 |
| Ekurhuleni                | South Africa | 0.37 [-0.11, 1.10]  | 30 [-9, 88]   | 58.3 |
| eThekweni                 | South Africa | 0.33 [-0.21, 0.99]  | 37 [-23, 111] | 34.8 |
| Frances Baard             | South Africa | 0.62 [-0.12, 1.66]  | 9 [-2, 25]    | 36.0 |
| Fezile Dabi               | South Africa | 0.38 [-0.44, 1.41]  | 8 [-9, 28]    | 41.8 |
| Gert Sibande              | South Africa | 0.22 [-0.82, 1.26]  | 9 [-31, 48]   | 38.0 |
| Greater Sekhukhune        | South Africa | 0.37 [-0.45, 1.38]  | 11 [-13, 41]  | 40.3 |
| Joe Gqabi                 | South Africa | 0.29 [-0.40, 1.14]  | 4 [-5, 16]    | 32.5 |
| Lejweleputswa             | South Africa | 0.56 [-0.01, 1.44]  | 18 [-0, 47]   | 42.9 |
| Mangaung                  | South Africa | 0.35 [-0.22, 1.22]  | 12 [-8, 42]   | 34.6 |
| Mopani                    | South Africa | 0.80 [-0.09, 1.77]  | 23 [-3, 52]   | 41.6 |
| Ngaka Modiri Molema       | South Africa | 0.50 [-0.22, 1.37]  | 15 [-7, 40]   | 50.0 |
| Nkangala                  | South Africa | 0.40 [-0.20, 1.34]  | 15 [-7, 49]   | 64.2 |
| Nelson Mandela Bay        | South Africa | 0.25 [-0.01, 0.55]  | 10 [-0, 22]   | 50.1 |
| Namakwa                   | South Africa | 0.80 [0.17, 1.58]   | 2 [1, 5]      | 41.5 |
| O.R.Tambo                 | South Africa | 0.28 [-0.23, 0.95]  | 11 [-9, 36]   | 38.2 |
| Overberg                  | South Africa | 0.35 [-0.07, 0.86]  | 2 [-0, 5]     | 41.4 |
| Pixley ka Seme            | South Africa | 0.48 [-0.20, 1.33]  | 4 [-2, 11]    | 41.2 |
| Sisonke                   | South Africa | 0.66 [-0.00, 1.42]  | 12 [-0, 25]   | 62.6 |
| Siyanda                   | South Africa | 0.91 [0.17, 1.84]   | 8 [2, 17]     | 42.8 |
| Thabo Mofutsanyane        | South Africa | -0.09 [-0.47, 0.07] | -3 [-17, 3]   | 63.4 |
| Ugu                       | South Africa | 0.22 [-0.45, 0.98]  | 7 [-15, 32]   | 47.2 |
| uMgungundlovu             | South Africa | 0.49 [-0.09, 1.13]  | 21 [-4, 49]   | 56.6 |
| uMkhanyakude              | South Africa | 0.05 [-0.70, 0.76]  | 1 [-12, 14]   | 31.8 |
| uMzinyathi                | South Africa | 0.35 [-0.23, 1.08]  | 7 [-5, 22]    | 37.1 |
| uThukela                  | South Africa | 0.21 [-0.54, 1.07]  | 6 [-15, 29]   | 31.0 |
| uThungulu                 | South Africa | 0.07 [-0.26, 0.42]  | 3 [-9, 15]    | 53.3 |
| Vhembe                    | South Africa | 1.30 [0.31, 2.71]   | 34 [8, 70]    | 50.2 |
| West Coast                | South Africa | 0.63 [0.06, 1.37]   | 7 [1, 15]     | 32.7 |
| Waterberg                 | South Africa | 0.89 [0.16, 1.94]   | 12 [2, 27]    | 46.2 |
| A Coruna                  | Spain        | 1.22 [-0.35, 2.38]  | 8 [-2, 16]    | 32.1 |
| Albacete                  | Spain        | 2.25 [-0.39, 4.61]  | 7 [-1, 14]    | 28.7 |
| Alicante                  | Spain        | 1.96 [-0.50, 4.11]  | 14 [-4, 29]   | 30.6 |
| Almeria                   | Spain        | 1.46 [-0.22, 3.50]  | 6 [-1, 14]    | 27.0 |
| Avila                     | Spain        | 2.16 [0.71, 4.59]   | 3 [1, 6]      | 29.0 |
| Badajoz                   | Spain        | 2.33 [1.13, 4.36]   | 7 [3, 13]     | 30.5 |
| Bilbao                    | Spain        | 1.26 [0.15, 3.07]   | 13 [2, 32]    | 25.6 |
| Barcelona                 | Spain        | 1.96 [0.27, 3.35]   | 94 [13, 162]  | 35.7 |
| Burgos                    | Spain        | 1.22 [0.00, 2.93]   | 5 [0, 13]     | 23.0 |
| Cadiz                     | Spain        | 1.69 [0.06, 4.58]   | 6 [0, 17]     | 27.2 |
| Caceres                   | Spain        | 2.40 [1.16, 4.60]   | 4 [2, 9]      | 30.0 |
| Ciudad Real               | Spain        | 3.00 [1.36, 4.94]   | 5 [2, 8]      | 35.4 |
| Ceuta                     | Spain        | 1.56 [0.22, 4.01]   | 2 [0, 6]      | 31.2 |
| Cordoba                   | Spain        | 2.63 [0.47, 4.31]   | 19 [3, 31]    | 38.1 |
| Castellon                 | Spain        | 2.27 [-0.36, 4.54]  | 8 [-1, 16]    | 34.4 |
| Cuenca                    | Spain        | 2.78 [-0.05, 5.73]  | 4 [-0, 8]     | 32.1 |
| Guadalajara               | Spain        | 2.63 [0.45, 5.71]   | 4 [1, 9]      | 31.2 |
| Girona                    | Spain        | 2.13 [0.03, 4.96]   | 4 [0, 9]      | 31.7 |
| Granada                   | Spain        | 2.18 [0.08, 4.16]   | 13 [0, 26]    | 32.7 |
| Huelva                    | Spain        | 1.41 [0.30, 3.44]   | 5 [1, 12]     | 25.9 |
| Huesca                    | Spain        | 1.96 [-0.12, 5.18]  | 3 [-0, 7]     | 25.2 |
| Jaen                      | Spain        | 2.36 [0.42, 4.27]   | 6 [1, 11]     | 29.0 |
| Leon                      | Spain        | 1.17 [-0.17, 2.65]  | 5 [-1, 10]    | 20.6 |
| Logrono                   | Spain        | 1.57 [0.08, 3.57]   | 5 [0, 12]     | 25.0 |
| Lleida                    | Spain        | 2.15 [0.06, 4.25]   | 7 [0, 13]     | 28.0 |
| Lugo                      | Spain        | 1.34 [-0.35, 2.46]  | 3 [-1, 6]     | 24.7 |

|                     |             |                     |               |      |
|---------------------|-------------|---------------------|---------------|------|
| Malaga              | Spain       | 1.96 [0.11, 4.21]   | 26 [1, 55]    | 31.4 |
| Madrid              | Spain       | 2.25 [0.33, 4.33]   | 177 [26, 341] | 31.9 |
| Melilla             | Spain       | 1.28 [-0.04, 3.16]  | 2 [-0, 4]     | 28.6 |
| Murcia              | Spain       | 1.75 [-0.11, 3.42]  | 14 [-1, 27]   | 29.0 |
| Ourense             | Spain       | 1.47 [-0.32, 2.82]  | 4 [-1, 8]     | 24.5 |
| Oviedo              | Spain       | 1.27 [-0.16, 2.87]  | 8 [-1, 17]    | 27.9 |
| Palmas G. Canaria   | Spain       | 0.79 [-0.39, 2.20]  | 7 [-3, 19]    | 22.5 |
| Palma Mallorca      | Spain       | 1.68 [0.10, 3.34]   | 14 [1, 28]    | 27.8 |
| Palencia            | Spain       | 1.69 [0.47, 3.45]   | 4 [1, 8]      | 23.8 |
| Pamplona            | Spain       | 1.49 [0.15, 3.39]   | 7 [1, 16]     | 24.5 |
| Pontevedra          | Spain       | 1.35 [-0.31, 2.64]  | 2 [-1, 5]     | 26.9 |
| Segovia             | Spain       | 2.00 [0.75, 4.43]   | 3 [1, 7]      | 28.0 |
| Salamanca           | Spain       | 2.30 [0.72, 4.91]   | 10 [3, 22]    | 31.2 |
| San Sebastian       | Spain       | 1.31 [-0.15, 3.13]  | 7 [-1, 16]    | 26.5 |
| Santander           | Spain       | 1.49 [-0.16, 3.82]  | 8 [-1, 20]    | 28.7 |
| Soria               | Spain       | 2.12 [-0.20, 4.91]  | 2 [-0, 5]     | 29.6 |
| Sevilla             | Spain       | 2.28 [0.61, 4.31]   | 39 [10, 73]   | 31.8 |
| Teruel              | Spain       | 2.72 [-0.04, 5.66]  | 3 [-0, 5]     | 32.7 |
| Tenerife            | Spain       | 0.79 [-0.55, 2.20]  | 4 [-3, 11]    | 20.6 |
| Toledo              | Spain       | 2.96 [0.90, 5.52]   | 5 [1, 9]      | 34.0 |
| Tarragona           | Spain       | 2.10 [0.12, 4.40]   | 6 [0, 12]     | 30.4 |
| Vitoria             | Spain       | 1.23 [0.13, 2.99]   | 6 [1, 14]     | 22.7 |
| Valladolid          | Spain       | 1.67 [0.16, 4.14]   | 13 [1, 32]    | 25.4 |
| Valencia            | Spain       | 1.80 [-0.29, 3.71]  | 38 [-6, 78]   | 31.1 |
| Zamora              | Spain       | 1.88 [0.60, 4.42]   | 3 [1, 8]      | 26.1 |
| Zaragoza            | Spain       | 1.90 [-0.27, 3.81]  | 32 [-5, 65]   | 26.3 |
| Basel               | Switzerland | 0.64 [-0.92, 1.62]  | 4 [-6, 10]    | 30.5 |
| Bern                | Switzerland | 0.52 [-0.78, 1.51]  | 2 [-4, 7]     | 29.4 |
| Geneve              | Switzerland | 0.82 [-1.12, 2.19]  | 4 [-5, 10]    | 30.2 |
| Lausanne            | Switzerland | 0.76 [-1.01, 2.05]  | 3 [-3, 7]     | 31.9 |
| Lugano              | Switzerland | 0.90 [-0.38, 2.22]  | 4 [-2, 10]    | 37.0 |
| Luzern              | Switzerland | 0.89 [-0.80, 2.09]  | 2 [-2, 5]     | 36.6 |
| St. Gallen          | Switzerland | 0.61 [-0.24, 1.98]  | 1 [-1, 4]     | 40.0 |
| Zürich              | Switzerland | 0.75 [-0.51, 1.77]  | 9 [-6, 21]    | 28.4 |
| Gothenburg          | Sweden      | 0.45 [0.03, 0.96]   | 10 [1, 21]    | 36.9 |
| Malmö               | Sweden      | 0.45 [0.09, 1.08]   | 7 [1, 18]     | 39.5 |
| Stockholm           | Sweden      | 0.33 [0.10, 0.70]   | 15 [5, 32]    | 40.4 |
| Amnat Charoen       | Thailand    | 1.63 [-7.83, 8.23]  | 6 [-27, 29]   | 60.5 |
| Ayutthaya           | Thailand    | 0.82 [-2.09, 3.52]  | 7 [-17, 29]   | 45.4 |
| Bangkok             | Thailand    | 1.78 [0.35, 4.78]   | 146 [29, 391] | 53.4 |
| Buri Ram            | Thailand    | 0.84 [-1.44, 2.62]  | 9 [-15, 28]   | 46.4 |
| Chachoengsao        | Thailand    | 0.69 [-0.55, 2.58]  | 5 [-4, 18]    | 54.3 |
| Chumphon            | Thailand    | 0.78 [-0.36, 2.26]  | 3 [-2, 10]    | 62.6 |
| Chon Buri           | Thailand    | 1.47 [-1.17, 6.27]  | 24 [-19, 101] | 61.3 |
| Chiang Mai          | Thailand    | 0.83 [-0.79, 2.54]  | 22 [-21, 67]  | 50.6 |
| Chiang Rai          | Thailand    | 0.72 [-1.73, 2.82]  | 14 [-32, 53]  | 56.1 |
| Chanthaburi         | Thailand    | 0.96 [-0.24, 3.28]  | 7 [-2, 25]    | 69.0 |
| Chaiyaphum          | Thailand    | 0.76 [-0.70, 2.80]  | 7 [-7, 27]    | 37.1 |
| Khon Kaen           | Thailand    | 0.69 [-0.25, 2.14]  | 14 [-5, 44]   | 40.8 |
| Kalasin             | Thailand    | 0.68 [-0.46, 2.19]  | 7 [-5, 23]    | 47.3 |
| Kamphaeng Phet      | Thailand    | 0.72 [-0.37, 2.08]  | 3 [-2, 10]    | 43.4 |
| Kanchanaburi        | Thailand    | 1.59 [-0.28, 3.89]  | 12 [-2, 28]   | 52.1 |
| Krabi               | Thailand    | 0.95 [-0.47, 2.43]  | 2 [-1, 6]     | 67.9 |
| Lamphun             | Thailand    | 1.15 [-0.63, 2.85]  | 6 [-4, 16]    | 47.6 |
| Lampang             | Thailand    | 1.83 [0.25, 3.63]   | 24 [3, 47]    | 53.6 |
| Lop Buri            | Thailand    | 1.05 [-6.04, 5.36]  | 11 [-61, 54]  | 55.8 |
| Maha Sarakham       | Thailand    | 2.27 [-0.37, 5.53]  | 19 [-3, 47]   | 48.1 |
| Mukdahan            | Thailand    | 2.11 [-1.92, 7.30]  | 5 [-5, 18]    | 55.2 |
| Nan                 | Thailand    | 0.76 [-1.00, 2.17]  | 5 [-6, 14]    | 45.1 |
| Nong Bua Lam Phu    | Thailand    | 0.54 [-2.38, 2.68]  | 2 [-10, 11]   | 42.7 |
| Nakhon Ratchasima   | Thailand    | 1.81 [0.33, 4.66]   | 46 [8, 118]   | 53.2 |
| Nakhon Sawan        | Thailand    | 1.93 [0.27, 5.16]   | 25 [4, 67]    | 48.4 |
| Nakhon Phanom       | Thailand    | 1.41 [-4.11, 6.44]  | 8 [-22, 35]   | 63.0 |
| Nakhon Pathom       | Thailand    | -0.18 [-2.18, 0.63] | -2 [-19, 5]   | 70.5 |
| Nakhon Si Thammarat | Thailand    | 1.44 [-0.60, 3.33]  | 19 [-8, 44]   | 64.9 |
| Nong Khai           | Thailand    | 0.58 [-3.24, 3.24]  | 4 [-23, 23]   | 46.3 |
| Nonthaburi          | Thailand    | 1.30 [-0.11, 3.91]  | 14 [-1, 41]   | 53.0 |
| Narathiwat          | Thailand    | 0.55 [-0.63, 1.88]  | 3 [-3, 10]    | 57.9 |
| Phayao              | Thailand    | 0.63 [-1.30, 2.21]  | 5 [-11, 18]   | 44.6 |
| Phetchaburi         | Thailand    | 1.92 [-0.56, 5.37]  | 9 [-3, 26]    | 68.7 |
| Phichit             | Thailand    | 3.08 [0.23, 8.10]   | 16 [1, 42]    | 50.2 |
| Phrae               | Thailand    | 1.42 [-2.53, 4.74]  | 11 [-19, 36]  | 52.2 |
| Phitsanulok         | Thailand    | 2.22 [-0.44, 6.14]  | 23 [-5, 65]   | 50.7 |

|                        |          |                     |               |      |
|------------------------|----------|---------------------|---------------|------|
| Prachin Buri           | Thailand | 3.09 [-2.21, 11.88] | 15 [-11, 59]  | 51.8 |
| Prachuap Khiri Khan    | Thailand | 0.87 [-0.73, 3.86]  | 4 [-4, 19]    | 70.7 |
| Pathum Thani           | Thailand | 0.93 [-0.05, 2.73]  | 7 [-0, 20]    | 47.9 |
| Pattani                | Thailand | 0.82 [-0.66, 3.76]  | 3 [-3, 15]    | 69.9 |
| Roi Et                 | Thailand | 1.02 [-0.38, 2.62]  | 14 [-5, 35]   | 46.5 |
| Ratchaburi             | Thailand | 0.88 [-0.40, 2.59]  | 9 [-4, 26]    | 45.8 |
| Rayong                 | Thailand | 1.12 [0.01, 3.24]   | 7 [0, 20]     | 58.4 |
| Sa Kaeo                | Thailand | 1.77 [-0.34, 4.08]  | 8 [-2, 19]    | 58.2 |
| Sukhothai              | Thailand | 1.80 [-0.17, 4.62]  | 11 [-1, 28]   | 54.7 |
| Sakon Nakhon           | Thailand | 0.74 [-0.34, 2.68]  | 8 [-4, 29]    | 54.8 |
| Samutprakan            | Thailand | 1.69 [-0.54, 6.17]  | 17 [-5, 62]   | 61.9 |
| Samut Sakhon           | Thailand | 1.07 [-1.02, 5.32]  | 6 [-5, 28]    | 60.0 |
| Songkhla               | Thailand | 0.69 [-1.12, 2.41]  | 8 [-13, 28]   | 67.2 |
| Suphanburi             | Thailand | 1.64 [-0.16, 4.84]  | 13 [-1, 40]   | 52.9 |
| Saraburi               | Thailand | 0.95 [-0.39, 3.37]  | 7 [-3, 26]    | 51.7 |
| Surat Thani            | Thailand | 0.42 [-0.35, 1.27]  | 3 [-3, 10]    | 46.5 |
| Si Sa Ket              | Thailand | 1.65 [0.06, 3.62]   | 20 [1, 44]    | 57.8 |
| Surin                  | Thailand | 1.00 [-0.92, 2.78]  | 10 [-9, 29]   | 50.4 |
| Tak                    | Thailand | 1.97 [-3.60, 6.69]  | 8 [-14, 26]   | 53.3 |
| Trang                  | Thailand | 0.67 [-0.69, 2.06]  | 3 [-3, 9]     | 65.6 |
| Ubon Ratchathani       | Thailand | 1.58 [0.14, 3.28]   | 26 [2, 54]    | 56.3 |
| Udon Thani             | Thailand | 0.76 [-0.46, 2.22]  | 12 [-7, 34]   | 44.7 |
| Uttaradit              | Thailand | 1.15 [-0.04, 3.32]  | 8 [-0, 23]    | 53.2 |
| Yala                   | Thailand | 1.62 [-1.54, 4.40]  | 6 [-6, 16]    | 69.8 |
| Yasothon               | Thailand | 1.05 [-0.50, 3.83]  | 6 [-3, 20]    | 62.7 |
| Kaohsiung              | Taiwan   | 0.72 [-0.07, 1.65]  | 37 [-4, 85]   | 72.0 |
| Taipei                 | Taiwan   | 0.65 [-0.25, 1.52]  | 61 [-24, 143] | 33.6 |
| Taichung               | Taiwan   | 0.76 [-0.00, 1.96]  | 29 [-0, 76]   | 32.9 |
| Accrington/Rossendale  | UK       | 0.17 [-0.17, 0.73]  | 0 [-0, 1]     | 34.9 |
| Bedford                | UK       | 0.37 [-0.00, 1.12]  | 1 [-0, 2]     | 36.5 |
| Blackburn              | UK       | 0.17 [-0.14, 0.70]  | 1 [-0, 2]     | 34.8 |
| Blackpool              | UK       | 0.17 [-0.04, 0.55]  | 1 [-0, 4]     | 39.8 |
| Brighton and Hove      | UK       | 0.35 [0.04, 0.92]   | 4 [0, 11]     | 38.3 |
| Barnsley/Dearne Valley | UK       | 0.37 [-0.03, 1.19]  | 1 [-0, 4]     | 35.1 |
| Birkenhead             | UK       | 0.15 [-0.16, 0.57]  | 1 [-1, 5]     | 36.6 |
| Burnley                | UK       | 0.21 [-0.13, 0.81]  | 1 [-0, 3]     | 35.2 |
| Bournemouth/Poole      | UK       | 0.19 [-0.07, 0.67]  | 2 [-1, 8]     | 41.0 |
| Bristol                | UK       | 0.31 [0.01, 0.84]   | 4 [0, 11]     | 38.6 |
| Burton upon Trent      | UK       | 0.27 [-0.19, 1.06]  | 0 [-0, 2]     | 35.8 |
| Basildon               | UK       | 0.29 [-0.02, 0.88]  | 1 [-0, 2]     | 33.7 |
| Basingstoke            | UK       | 0.25 [-0.12, 0.87]  | 0 [-0, 1]     | 37.2 |
| Chelmsford             | UK       | 0.31 [-0.06, 0.99]  | 1 [-0, 2]     | 32.7 |
| Cheltenham             | UK       | 0.41 [0.03, 1.21]   | 1 [0, 3]      | 37.4 |
| Chesterfield           | UK       | 0.37 [-0.04, 1.18]  | 1 [-0, 2]     | 34.1 |
| Colchester             | UK       | 0.32 [-0.04, 1.13]  | 1 [-0, 2]     | 35.1 |
| Cambridge              | UK       | 0.29 [-0.03, 1.01]  | 1 [-0, 2]     | 33.8 |
| Cardiff                | UK       | 0.34 [0.01, 0.96]   | 3 [0, 8]      | 39.7 |
| Crawley                | UK       | 0.18 [-0.14, 0.68]  | 0 [-0, 2]     | 33.7 |
| Coventry               | UK       | 0.11 [-0.27, 0.65]  | 1 [-2, 5]     | 35.6 |
| Doncaster              | UK       | 0.74 [0.11, 1.85]   | 2 [0, 5]      | 35.5 |
| Derby                  | UK       | 0.34 [-0.03, 1.15]  | 2 [-0, 6]     | 37.1 |
| Eastbourne             | UK       | 0.14 [-0.24, 0.67]  | 0 [-1, 2]     | 39.5 |
| Exeter                 | UK       | 0.27 [-0.19, 1.02]  | 1 [-0, 2]     | 42.9 |
| Farnborough/Aldershot  | UK       | 0.35 [0.02, 0.94]   | 1 [0, 4]      | 34.6 |
| Gloucester             | UK       | 0.34 [-0.04, 1.02]  | 1 [-0, 3]     | 36.4 |
| Grimsby                | UK       | 0.32 [-0.09, 1.00]  | 1 [-0, 3]     | 34.7 |
| High Wycombe           | UK       | 0.23 [-0.06, 0.74]  | 0 [-0, 1]     | 34.3 |
| Hastings               | UK       | 0.11 [-0.23, 0.57]  | 0 [-1, 2]     | 35.3 |
| Ipswich                | UK       | 0.30 [-0.04, 0.85]  | 1 [-0, 3]     | 36.2 |
| Kingston upon Hull     | UK       | 0.22 [-0.13, 0.74]  | 2 [-1, 6]     | 32.9 |
| Leicester              | UK       | 0.24 [-0.08, 0.87]  | 2 [-1, 8]     | 37.3 |
| Lincoln                | UK       | 0.24 [-0.15, 0.85]  | 1 [-0, 2]     | 32.3 |
| London                 | UK       | 0.45 [0.07, 0.91]   | 82 [12, 167]  | 33.6 |
| Luton                  | UK       | 0.41 [0.02, 1.22]   | 2 [0, 6]      | 35.3 |
| Liverpool              | UK       | 0.17 [-0.00, 0.50]  | 4 [-0, 12]    | 37.1 |
| Maidstone              | UK       | 0.22 [-0.05, 0.73]  | 0 [-0, 1]     | 32.7 |
| Medway Towns           | UK       | 0.27 [-0.01, 0.80]  | 1 [-0, 4]     | 34.5 |
| Milton Keynes          | UK       | 0.39 [-0.03, 1.23]  | 1 [-0, 3]     | 36.5 |
| Manchester             | UK       | 0.28 [0.00, 0.76]   | 16 [0, 43]    | 35.0 |
| Mansfield              | UK       | 0.15 [-0.29, 0.74]  | 0 [-1, 2]     | 33.6 |
| Northampton            | UK       | 0.39 [-0.01, 1.23]  | 2 [-0, 5]     | 34.8 |
| Norwich                | UK       | 0.20 [-0.17, 0.73]  | 1 [-1, 3]     | 32.0 |
| Nottingham             | UK       | 0.19 [-0.15, 0.74]  | 3 [-2, 11]    | 36.2 |

|                  |         |                     |               |      |
|------------------|---------|---------------------|---------------|------|
| Newport          | UK      | 0.19 [-0.17, 0.74]  | 1 [-1, 3]     | 39.4 |
| Oxford           | UK      | 0.31 [-0.06, 0.96]  | 1 [-0, 2]     | 36.3 |
| Paignton/Torquay | UK      | 0.41 [0.00, 1.19]   | 1 [0, 4]      | 44.5 |
| Plymouth         | UK      | 0.22 [-0.06, 0.74]  | 1 [-0, 4]     | 43.1 |
| Preston          | UK      | 0.24 [-0.04, 0.82]  | 1 [-0, 4]     | 35.9 |
| Peterborough     | UK      | 0.31 [-0.08, 1.05]  | 1 [-0, 3]     | 35.8 |
| Reading          | UK      | 0.36 [0.03, 0.97]   | 2 [0, 5]      | 35.2 |
| Sheffield        | UK      | 0.33 [0.00, 0.94]   | 5 [0, 13]     | 33.3 |
| Slough           | UK      | 0.32 [-0.00, 0.90]  | 1 [-0, 2]     | 33.5 |
| Sunderland       | UK      | 0.33 [-0.06, 0.99]  | 2 [-0, 7]     | 37.4 |
| South Hampshire  | UK      | 0.35 [0.01, 0.96]   | 6 [0, 16]     | 38.3 |
| Southend-on-Sea  | UK      | 0.52 [0.07, 1.30]   | 4 [1, 10]     | 34.2 |
| Stoke-on-Trent   | UK      | 0.14 [-0.12, 0.66]  | 1 [-1, 5]     | 34.7 |
| Swindon          | UK      | 0.19 [-0.20, 0.78]  | 1 [-1, 3]     | 33.4 |
| Swansea          | UK      | 0.19 [-0.11, 0.70]  | 1 [-1, 3]     | 43.1 |
| Thanet           | UK      | 0.24 [-0.02, 0.67]  | 1 [-0, 2]     | 40.0 |
| Telford          | UK      | 0.30 [-0.05, 1.09]  | 1 [-0, 2]     | 36.6 |
| Teesside         | UK      | 0.38 [-0.03, 1.00]  | 3 [-0, 9]     | 33.5 |
| Tyneside         | UK      | -0.03 [-0.25, 0.05] | -1 [-5, 1]    | 41.0 |
| Wigan            | UK      | 0.25 [-0.04, 0.85]  | 1 [-0, 3]     | 36.3 |
| Worcester        | UK      | 0.18 [-0.23, 0.86]  | 0 [-0, 2]     | 37.2 |
| Warrington       | UK      | 0.28 [-0.05, 0.92]  | 1 [-0, 3]     | 35.6 |
| West Midlands    | UK      | 0.32 [0.03, 0.91]   | 20 [2, 56]    | 37.2 |
| West Yorkshire   | UK      | 0.11 [-0.14, 0.48]  | 4 [-5, 17]    | 32.5 |
| York             | UK      | 0.42 [0.01, 1.25]   | 1 [0, 4]      | 36.3 |
| Montevideo       | Uruguay | 0.75 [-0.95, 2.25]  | 69 [-87, 208] | 25.5 |
| Augusta          | USA     | 0.35 [-0.53, 1.29]  | 2 [-3, 7]     | 35.7 |
| Akron            | USA     | -0.04 [-0.34, 0.09] | -1 [-5, 1]    | 52.9 |
| Albany           | USA     | 0.40 [-0.15, 1.30]  | 3 [-1, 11]    | 40.2 |
| Albuquerque      | USA     | 0.31 [-0.42, 1.23]  | 3 [-5, 13]    | 30.8 |
| Allentown        | USA     | 0.11 [-0.47, 0.77]  | 1 [-4, 7]     | 33.5 |
| Anchorage        | USA     | -0.06 [-0.90, 0.52] | -0 [-2, 1]    | 65.5 |
| Anaheim          | USA     | 0.08 [-0.15, 0.46]  | 4 [-7, 21]    | 26.8 |
| AnnArbor         | USA     | 0.21 [-0.22, 0.91]  | 1 [-1, 5]     | 34.5 |
| Annandale        | USA     | 0.20 [-0.36, 0.87]  | 2 [-4, 10]    | 31.2 |
| Austin           | USA     | 0.28 [-0.20, 0.96]  | 3 [-2, 10]    | 22.7 |
| Atlantic City    | USA     | 0.08 [-0.49, 0.66]  | 1 [-3, 5]     | 34.5 |
| Atlanta          | USA     | 0.41 [0.00, 1.17]   | 19 [0, 54]    | 24.3 |
| Atzac            | USA     | 0.33 [-0.50, 1.42]  | 1 [-1, 3]     | 35.0 |
| Bath             | USA     | 0.44 [-0.06, 1.30]  | 1 [-0, 4]     | 43.7 |
| Buffalo          | USA     | 0.46 [0.02, 1.24]   | 14 [1, 37]    | 41.7 |
| Bakersfield      | USA     | 0.10 [-0.54, 0.93]  | 1 [-7, 12]    | 7.3  |
| Boulder          | USA     | 0.27 [-0.32, 1.06]  | 1 [-1, 4]     | 24.9 |
| Baltimore        | USA     | 0.57 [0.04, 1.30]   | 26 [2, 59]    | 47.2 |
| Bangor           | USA     | 0.34 [-0.15, 1.00]  | 1 [-1, 4]     | 45.1 |
| Boise            | USA     | 0.07 [-1.34, 1.37]  | 0 [-6, 6]     | 24.6 |
| bergen           | USA     | 0.42 [-0.01, 0.98]  | 14 [-0, 32]   | 44.0 |
| Burlington       | USA     | 0.35 [-0.20, 1.01]  | 1 [-1, 3]     | 36.3 |
| Birmingham       | USA     | 0.29 [-0.23, 1.00]  | 7 [-5, 24]    | 23.0 |
| Barnstable       | USA     | 0.24 [-0.24, 0.89]  | 2 [-2, 7]     | 45.1 |
| Brownsville      | USA     | 0.31 [-1.45, 1.76]  | 2 [-8, 9]     | 33.7 |
| Boston           | USA     | 0.05 [-0.13, 0.27]  | 3 [-9, 18]    | 36.6 |
| Baton Rouge      | USA     | 0.41 [-0.95, 1.45]  | 4 [-9, 14]    | 35.3 |
| Cedar Rapids     | USA     | 0.19 [-2.57, 1.55]  | 1 [-10, 6]    | 17.6 |
| Chicago          | USA     | 0.55 [-0.56, 1.41]  | 87 [-88, 223] | 36.4 |
| Charlotte        | USA     | -0.03 [-0.28, 0.09] | -0 [-3, 1]    | 72.2 |
| Charleston SC    | USA     | 0.27 [-0.30, 0.95]  | 2 [-2, 7]     | 40.0 |
| Chattanooga      | USA     | 0.25 [-0.27, 0.96]  | 2 [-2, 9]     | 40.1 |
| Charleston WV    | USA     | 0.27 [-0.56, 1.30]  | 2 [-4, 9]     | 42.3 |
| Columbus         | USA     | 0.17 [-0.45, 0.86]  | 4 [-11, 20]   | 21.2 |
| Colorado Springs | USA     | 0.58 [-0.28, 1.90]  | 4 [-2, 15]    | 42.4 |
| Cleveland        | USA     | 0.20 [-0.12, 0.74]  | 12 [-7, 42]   | 38.7 |
| Cincinnati       | USA     | 0.26 [-0.16, 0.99]  | 6 [-4, 24]    | 49.2 |
| Canton           | USA     | 0.37 [-0.22, 1.31]  | 4 [-2, 14]    | 41.3 |
| Columbia         | USA     | 0.22 [-0.31, 0.88]  | 2 [-4, 10]    | 33.9 |
| Carlisle         | USA     | 0.19 [-0.37, 0.87]  | 1 [-2, 5]     | 35.1 |
| Corpus Christ    | USA     | 0.30 [-0.44, 1.13]  | 2 [-3, 8]     | 47.9 |
| Davis            | USA     | 0.22 [-0.48, 1.09]  | 1 [-1, 3]     | 29.9 |
| Dallas           | USA     | 0.22 [-0.35, 1.23]  | 8 [-13, 48]   | 13.7 |
| Denver           | USA     | 0.35 [-0.25, 1.35]  | 10 [-7, 37]   | 18.6 |
| Dodge            | USA     | 0.36 [-2.79, 2.29]  | 1 [-7, 6]     | 26.0 |
| Dover            | USA     | 0.39 [-0.24, 1.33]  | 1 [-1, 4]     | 50.7 |
| Durham           | USA     | 0.40 [-0.42, 1.34]  | 2 [-2, 6]     | 49.7 |

|                 |     |                     |               |      |
|-----------------|-----|---------------------|---------------|------|
| Des Moines      | USA | 0.23 [-2.01, 1.67]  | 2 [-16, 13]   | 19.3 |
| Detroit         | USA | 0.54 [-0.10, 1.32]  | 57 [-10, 139] | 38.3 |
| Davenport       | USA | 0.15 [-0.26, 0.66]  | 1 [-2, 5]     | 29.6 |
| Daytona Beach   | USA | -0.16 [-0.99, 0.15] | -3 [-16, 2]   | 72.8 |
| Dayton          | USA | 0.14 [-0.63, 0.97]  | 2 [-10, 15]   | 23.5 |
| El Centro       | USA | 0.41 [-0.43, 1.34]  | 1 [-1, 3]     | 18.6 |
| Elkhart         | USA | 0.16 [-0.38, 1.00]  | 1 [-1, 4]     | 29.4 |
| El Paso         | USA | 0.50 [-0.07, 1.59]  | 6 [-1, 18]    | 29.0 |
| Elizabeth       | USA | 0.48 [-0.01, 1.11]  | 6 [-0, 15]    | 44.6 |
| Erie            | USA | 0.66 [0.02, 1.69]   | 5 [0, 13]     | 41.2 |
| Essex           | USA | 0.28 [-0.04, 0.77]  | 5 [-1, 14]    | 42.0 |
| Eugene          | USA | 0.01 [-0.36, 0.36]  | 0 [-3, 3]     | 28.2 |
| Evansville      | USA | 0.46 [-2.63, 2.19]  | 2 [-14, 12]   | 25.5 |
| Everett         | USA | 0.03 [-0.20, 0.30]  | 0 [-2, 3]     | 45.1 |
| Fargo           | USA | 0.20 [-0.78, 1.01]  | 0 [-2, 2]     | 25.7 |
| Flint           | USA | 0.41 [-0.18, 1.41]  | 5 [-2, 16]    | 35.1 |
| Fresno          | USA | 0.06 [-0.58, 0.66]  | 1 [-9, 10]    | 4.6  |
| Fort Lauderdale | USA | 0.02 [-0.60, 0.61]  | 1 [-28, 28]   | 71.1 |
| Fort Myers      | USA | 0.29 [-0.69, 1.27]  | 4 [-9, 17]    | 51.4 |
| Fort Pierce     | USA | 0.45 [-0.36, 1.32]  | 5 [-4, 14]    | 44.8 |
| Fort Worth      | USA | 0.26 [-0.46, 1.40]  | 7 [-12, 36]   | 18.1 |
| Fort Wayne      | USA | 0.11 [-0.34, 0.92]  | 1 [-3, 7]     | 15.0 |
| Fayetteville    | USA | 0.69 [-0.12, 1.74]  | 4 [-1, 9]     | 44.4 |
| Gary            | USA | 0.18 [-1.51, 0.98]  | 2 [-20, 13]   | 23.3 |
| Green bay       | USA | 0.21 [-0.28, 0.82]  | 1 [-1, 4]     | 31.5 |
| Greensburg      | USA | 0.12 [-0.24, 0.62]  | 2 [-3, 8]     | 42.9 |
| Grand Heaven    | USA | 0.31 [-0.38, 1.32]  | 1 [-2, 5]     | 37.2 |
| Grand Junction  | USA | 0.54 [-0.60, 1.83]  | 2 [-2, 6]     | 34.0 |
| Grand Rapids    | USA | 0.26 [-0.24, 0.96]  | 3 [-3, 11]    | 34.9 |
| Greensburg      | USA | 0.32 [-0.43, 1.22]  | 3 [-4, 12]    | 51.6 |
| Greenv          | USA | 0.26 [-0.24, 0.91]  | 2 [-2, 8]     | 30.6 |
| Gasinesville    | USA | 0.63 [-0.57, 1.95]  | 3 [-2, 8]     | 45.4 |
| Gettysburg      | USA | 0.26 [-0.22, 0.96]  | 1 [-1, 2]     | 40.7 |
| Hicory          | USA | 0.24 [-0.47, 1.04]  | 1 [-2, 4]     | 53.1 |
| Holland         | USA | 0.24 [-0.37, 1.12]  | 1 [-1, 3]     | 36.4 |
| honolulu        | USA | 2.15 [-0.15, 5.67]  | 35 [-2, 93]   | 82.2 |
| Harrisburg      | USA | 0.40 [-0.12, 1.20]  | 3 [-1, 9]     | 44.0 |
| Hartford        | USA | 0.35 [0.05, 0.87]   | 8 [1, 20]     | 42.9 |
| Houston         | USA | 0.18 [-0.25, 0.71]  | 10 [-14, 40]  | 26.3 |
| Indianapolis    | USA | 0.70 [-0.03, 2.03]  | 15 [-1, 44]   | 46.9 |
| iowa city       | USA | 0.11 [-1.21, 0.93]  | 0 [-2, 1]     | 19.3 |
| Jacksonville    | USA | 0.29 [-0.37, 1.07]  | 5 [-7, 20]    | 30.3 |
| Jersy city      | USA | 0.46 [-0.03, 1.27]  | 6 [-0, 18]    | 43.9 |
| Klamath         | USA | 0.54 [-0.13, 1.62]  | 1 [-0, 3]     | 35.0 |
| Kalamazoo       | USA | 0.32 [-0.25, 1.08]  | 2 [-1, 6]     | 33.9 |
| Kenosha         | USA | 0.19 [-0.28, 0.83]  | 1 [-1, 3]     | 31.6 |
| Kansas          | USA | 0.21 [-0.44, 1.31]  | 7 [-14, 42]   | 16.5 |
| Knoxville       | USA | 0.51 [-0.04, 1.50]  | 6 [-0, 17]    | 47.3 |
| Lafayette IN    | USA | 0.12 [-1.19, 1.25]  | 0 [-3, 4]     | 24.9 |
| Lafayette LA    | USA | -0.03 [-0.50, 0.44] | -0 [-2, 2]    | 30.3 |
| Lake Charles    | USA | 0.15 [-0.49, 0.76]  | 1 [-2, 4]     | 21.3 |
| Lakeland        | USA | 0.60 [-0.22, 1.63]  | 9 [-3, 23]    | 37.0 |
| Lancaster       | USA | 0.29 [-0.11, 0.95]  | 3 [-1, 11]    | 48.4 |
| Lansing         | USA | 0.35 [-0.32, 1.34]  | 2 [-2, 7]     | 29.3 |
| Logan           | USA | 0.12 [-0.16, 0.50]  | 0 [-0, 1]     | 38.2 |
| Louisville      | USA | 0.42 [-0.09, 1.31]  | 8 [-2, 26]    | 38.2 |
| La Porte        | USA | 0.06 [-0.54, 0.46]  | 0 [-2, 1]     | 20.2 |
| Los Angeles     | USA | 0.12 [-0.16, 0.59]  | 21 [-28, 102] | 29.6 |
| Las Vegas       | USA | 0.28 [-0.10, 1.03]  | 8 [-3, 31]    | 16.9 |
| Little Rock     | USA | 0.35 [-0.83, 1.54]  | 3 [-8, 14]    | 24.8 |
| Macon           | USA | 0.25 [-0.97, 1.31]  | 1 [-5, 6]     | 29.9 |
| Mcallen         | USA | 0.47 [-0.30, 1.33]  | 4 [-2, 10]    | 37.3 |
| Middles         | USA | 0.15 [-0.23, 0.67]  | 2 [-4, 11]    | 35.6 |
| Middletown      | USA | -0.01 [-0.20, 0.13] | -0 [-1, 1]    | 63.6 |
| Medford         | USA | 0.08 [-0.26, 0.46]  | 0 [-1, 2]     | 28.7 |
| Madison IL      | USA | 0.01 [-0.34, 0.60]  | 0 [-2, 4]     | -8.8 |
| Modesto         | USA | 0.05 [-0.34, 0.53]  | 0 [-3, 5]     | 6.3  |
| Madison WI      | USA | 0.10 [-1.32, 0.88]  | 1 [-10, 6]    | 20.1 |
| Miami           | USA | 0.50 [-1.02, 2.10]  | 28 [-57, 117] | 43.7 |
| Melbourn        | USA | 0.69 [-0.25, 1.82]  | 10 [-3, 25]   | 45.2 |
| Milwaukee       | USA | 0.36 [-0.39, 1.06]  | 12 [-13, 35]  | 34.1 |
| Memphis         | USA | 0.27 [-1.08, 1.47]  | 6 [-24, 33]   | 26.7 |
| Monmouth        | USA | 0.11 [-0.19, 0.48]  | 4 [-6, 17]    | 37.3 |

|                |     |                     |               |      |
|----------------|-----|---------------------|---------------|------|
| Minneapolis    | USA | 0.08 [-0.79, 0.64]  | 3 [-27, 22]   | 21.1 |
| Montgomery     | USA | 0.18 [-1.00, 0.98]  | 1 [-6, 6]     | 23.0 |
| Mobile         | USA | 0.26 [-0.91, 0.94]  | 3 [-10, 10]   | 30.2 |
| Monroe         | USA | 0.32 [-1.76, 2.08]  | 1 [-7, 8]     | 18.9 |
| Mercer         | USA | 0.34 [-0.33, 1.19]  | 1 [-1, 5]     | 39.8 |
| Marlboro       | USA | 0.29 [-0.18, 1.04]  | 3 [-2, 12]    | 46.6 |
| Muskegon       | USA | 0.28 [-0.40, 1.29]  | 1 [-2, 6]     | 34.6 |
| Muncie         | USA | 0.37 [-0.24, 1.31]  | 1 [-1, 4]     | 36.5 |
| Myrtle Beach   | USA | 0.55 [-0.15, 1.81]  | 3 [-1, 9]     | 50.7 |
| Nashua         | USA | 0.35 [-0.20, 1.16]  | 3 [-1, 8]     | 32.0 |
| Nassau         | USA | 0.14 [-0.05, 0.43]  | 9 [-3, 28]    | 48.6 |
| Niles          | USA | 0.21 [-0.46, 1.16]  | 1 [-2, 5]     | 30.2 |
| Norfolk        | USA | 0.39 [-0.03, 1.06]  | 11 [-1, 29]   | 52.9 |
| Nashville      | USA | 0.27 [-0.50, 1.19]  | 4 [-7, 17]    | 22.7 |
| Newburgh       | USA | 0.15 [-0.37, 0.72]  | 1 [-3, 5]     | 28.8 |
| Newhaven       | USA | 0.13 [-0.23, 0.55]  | 3 [-5, 12]    | 26.8 |
| Newlond        | USA | 0.39 [-0.05, 1.12]  | 2 [-0, 7]     | 49.7 |
| NewOrleans     | USA | 0.34 [-0.16, 1.10]  | 9 [-4, 29]    | 30.0 |
| Newark         | USA | 0.47 [-0.01, 1.03]  | 15 [-0, 32]   | 43.5 |
| New York       | USA | 0.76 [0.12, 1.52]   | 141 [23, 282] | 44.2 |
| Ocala          | USA | 0.28 [-0.30, 0.93]  | 3 [-3, 9]     | 34.3 |
| Oklahoma       | USA | 0.19 [-0.40, 1.11]  | 3 [-7, 20]    | 16.5 |
| Oakland        | USA | 0.08 [-0.13, 0.47]  | 4 [-6, 22]    | 35.0 |
| Omaha          | USA | 0.07 [-0.98, 1.01]  | 1 [-10, 10]   | 14.5 |
| Orlando        | USA | 0.13 [-0.50, 0.77]  | 3 [-12, 19]   | 47.1 |
| Ottawa         | USA | 0.09 [-0.92, 0.61]  | 0 [-3, 2]     | 22.4 |
| Philadelphia   | USA | 0.31 [-0.01, 0.75]  | 39 [-1, 96]   | 46.1 |
| Phoenix        | USA | 0.38 [-0.04, 1.06]  | 23 [-3, 62]   | 37.0 |
| Palmbeach      | USA | 0.13 [-1.53, 1.54]  | 5 [-55, 55]   | 66.9 |
| Plymouth       | USA | 0.27 [-0.18, 0.99]  | 3 [-2, 11]    | 29.1 |
| Pensacola      | USA | 0.21 [-0.44, 0.93]  | 2 [-3, 7]     | 42.9 |
| Portland OR    | USA | 0.26 [-0.17, 0.64]  | 8 [-5, 20]    | 29.6 |
| Provo          | USA | 0.25 [-0.18, 0.93]  | 1 [-1, 4]     | 42.7 |
| Port Arthur    | USA | 0.35 [-0.60, 1.39]  | 3 [-4, 10]    | 34.9 |
| Portage        | USA | 0.18 [-0.25, 0.63]  | 1 [-1, 2]     | 26.1 |
| Portlme        | USA | 0.39 [-0.03, 1.02]  | 3 [-0, 7]     | 41.3 |
| Providence     | USA | 0.63 [0.16, 1.33]   | 23 [6, 48]    | 40.7 |
| Pittsburg      | USA | 0.32 [-0.25, 0.98]  | 14 [-11, 43]  | 43.4 |
| Richmond       | USA | 0.38 [-0.14, 1.11]  | 6 [-2, 19]    | 49.2 |
| Rochester      | USA | 0.35 [-0.04, 1.02]  | 7 [-1, 19]    | 39.0 |
| Rockville      | USA | -0.02 [-0.17, 0.09] | -0 [-2, 1]    | 75.0 |
| Reading        | USA | 0.39 [-0.07, 1.18]  | 4 [-1, 12]    | 43.2 |
| Reno           | USA | 0.10 [-0.46, 0.75]  | 1 [-3, 5]     | 24.0 |
| Raleigh        | USA | -0.07 [-0.58, 0.18] | -1 [-5, 2]    | 63.7 |
| Riverside      | USA | 0.18 [-0.11, 0.78]  | 12 [-7, 52]   | 13.2 |
| Sacramento     | USA | 0.05 [-0.33, 0.37]  | 1 [-8, 9]     | 9.4  |
| Scranton       | USA | 0.29 [-0.05, 0.87]  | 6 [-1, 18]    | 47.9 |
| San Diego      | USA | 0.08 [-0.16, 0.37]  | 4 [-9, 20]    | 20.6 |
| San Francisco  | USA | 0.03 [-0.24, 0.32]  | 1 [-8, 11]    | 32.4 |
| Salt Lake      | USA | -0.01 [-0.13, 0.07] | -0 [-2, 1]    | 63.9 |
| San Jose       | USA | 0.07 [-0.50, 0.54]  | 2 [-13, 14]   | 10.5 |
| Santa Barbara  | USA | -0.00 [-0.09, 0.06] | -0 [-1, 0]    | 51.5 |
| San Antonio    | USA | 0.14 [-0.18, 0.55]  | 4 [-5, 15]    | 31.9 |
| Spokane        | USA | 0.35 [-0.48, 1.13]  | 4 [-5, 11]    | 40.2 |
| Springfield MA | USA | 0.12 [-0.26, 0.62]  | 2 [-3, 8]     | 37.8 |
| Springfied MO  | USA | 0.33 [-0.35, 1.22]  | 2 [-2, 8]     | 41.6 |
| Spartanburg    | USA | 0.33 [-0.20, 1.17]  | 2 [-1, 8]     | 47.3 |
| Sarasota       | USA | -0.03 [-0.25, 0.10] | -1 [-6, 2]    | 54.4 |
| Steubenville   | USA | 0.43 [-0.32, 1.40]  | 2 [-1, 6]     | 42.5 |
| Saint Charles  | USA | 0.27 [-1.64, 1.79]  | 1 [-7, 8]     | 22.5 |
| Stockton       | USA | 0.01 [-0.25, 0.28]  | 0 [-3, 3]     | 11.8 |
| Saint Clair    | USA | 0.06 [-0.90, 0.90]  | 0 [-6, 6]     | 20.1 |
| South bend     | USA | 0.11 [-1.11, 0.98]  | 1 [-8, 7]     | 20.7 |
| St Louis       | USA | 0.04 [-0.56, 0.55]  | 2 [-25, 24]   | 20.1 |
| Stamford       | USA | 0.31 [0.00, 0.79]   | 6 [0, 16]     | 45.1 |
| St. Petersbur  | USA | 0.57 [-0.17, 1.39]  | 14 [-4, 33]   | 41.0 |
| State College  | USA | 0.23 [-0.46, 1.05]  | 1 [-1, 2]     | 40.6 |
| Seattle        | USA | 0.26 [-0.27, 1.10]  | 9 [-9, 36]    | 42.4 |
| Sioux City     | USA | 0.19 [-1.79, 1.68]  | 0 [-5, 4]     | 15.7 |
| Tacoma         | USA | 0.06 [-0.13, 0.26]  | 1 [-2, 4]     | 33.6 |
| Tampa          | USA | 0.51 [-0.60, 1.59]  | 12 [-14, 38]  | 40.2 |
| Tucson         | USA | 0.67 [0.02, 1.74]   | 13 [0, 34]    | 33.0 |
| Tallahassee    | USA | 0.48 [-0.51, 1.38]  | 2 [-2, 6]     | 42.4 |

|                  |         |                    |               |      |
|------------------|---------|--------------------|---------------|------|
| Toledo           | USA     | 0.15 [-0.16, 0.68] | 2 [-2, 9]     | 34.0 |
| Topeka           | USA     | 0.18 [-0.50, 1.35] | 1 [-2, 6]     | 18.8 |
| Trenton          | USA     | 0.24 [-0.27, 0.94] | 2 [-2, 8]     | 37.3 |
| Terra Haute      | USA     | 0.34 [-2.04, 1.83] | 1 [-7, 6]     | 28.4 |
| Tulsa            | USA     | 0.07 [-0.55, 0.84] | 1 [-8, 12]    | 8.4  |
| Visalia          | USA     | 0.12 [-0.30, 1.00] | 1 [-2, 7]     | 11.3 |
| Vancouver        | USA     | 0.15 [-0.27, 0.63] | 1 [-2, 4]     | 30.9 |
| Ventura          | USA     | 0.08 [-0.27, 0.66] | 1 [-3, 9]     | 24.6 |
| Wichita          | USA     | 0.34 [-0.59, 1.62] | 3 [-6, 16]    | 16.7 |
| Weber            | USA     | 0.25 [-0.59, 1.29] | 1 [-2, 5]     | 29.5 |
| Wilmington       | USA     | 0.39 [-0.13, 1.23] | 4 [-1, 14]    | 51.4 |
| Winston          | USA     | 0.68 [0.06, 1.65]  | 5 [0, 12]     | 47.2 |
| Worcester        | USA     | 0.45 [-0.16, 1.28] | 9 [-3, 24]    | 27.6 |
| WDC              | USA     | 0.52 [0.02, 1.34]  | 10 [0, 26]    | 51.0 |
| Washington       | USA     | 0.13 [-0.30, 0.71] | 1 [-2, 5]     | 42.8 |
| Youngstown       | USA     | 0.23 [-0.27, 0.87] | 3 [-3, 11]    | 40.9 |
| York             | USA     | 0.19 [-0.34, 0.86] | 2 [-3, 8]     | 33.8 |
| Ho Chi Minh City | Vietnam | 1.52 [0.34, 5.40]  | 137 [30, 485] | 48.5 |
| Hue              | Vietnam | 0.54 [-0.72, 1.76] | 2 [-3, 7]     | 45.5 |
